# Supplementary material
Source: HighWire-hosted journal article supplement (https://jnis.bmj.com/highwire/filestream/171045/field_highwire_adjunct_files/0/neurintsurg-2021-018501supp001_data_supplement.pdf)
Supplement: neurintsurg-2021-018501supp001_data_supplement.pdf [file neurintsurg-2021-018501supp001_data_supplement.pdf]

ICMJE DISCLOSURE FORM

Date:1/13/2022

Your Name:Adel M. Malek

Manuscript Title:Prospective Study on Embolization of Intracranial Aneurysms with the Pipeline Device (PREMIER study): 3-year results with the application of a flow diverter-specific occlusion classification

Manuscript Number (if known):neurintsurg-2021-018501

In the interest of transparency, we ask you to disclose all relationships/activities/interests listed below that are related to the content of your manuscript. “Related” means any relation with for-profit or not-for-profit third parties whose interests may be affected by the content of the manuscript. Disclosure represents a commitment to transparency and does not necessarily indicate a bias. If you are in doubt about whether to list a relationship/activity/interest, it is preferable that you do so.

The author’s relationships/activities/interests should be defined broadly. For example, if your manuscript pertains to the epidemiology of hypertension, you should declare all relationships with manufacturers of antihypertensive medication, even if that medication is not mentioned in the manuscript.

In item #1 below, report all support for the work reported in this manuscript without time limit. For all other items, the time frame for disclosure is the past 36 months.

|                                                    | Name all entities with whom you have this relationship or indicate none (add rows as needed)                                                                                                                                                                                                                                                                                      | Specifications/Comments (e.g., if payments were made to you or to your institution) |  |  |  |  |                                           |  |
|----------------------------------------------------|-----------------------------------------------------------------------------------------------------------------------------------------------------------------------------------------------------------------------------------------------------------------------------------------------------------------------------------------------------------------------------------|-------------------------------------------------------------------------------------|--|--|--|--|-------------------------------------------|--|
| Time frame: Since the initial planning of the work |                                                                                                                                                                                                                                                                                                                                                                                   |                                                                                     |  |  |  |  |                                           |  |
| 1                                                  | <div>All support for the present manuscript (e.g., funding, provision of study materials, medical writing, article processing charges, etc.)<br/>No time limit for this item.</div> <div><input checked="" type="checkbox"/> None</div> <table><tr><td></td><td></td></tr><tr><td></td><td></td></tr><tr><td></td><td>Click the tab key to add additional rows.</td></tr></table> |                                                                                     |  |  |  |  | Click the tab key to add additional rows. |  |
|                                                    |                                                                                                                                                                                                                                                                                                                                                                                   |                                                                                     |  |  |  |  |                                           |  |
|                                                    |                                                                                                                                                                                                                                                                                                                                                                                   |                                                                                     |  |  |  |  |                                           |  |
|                                                    | Click the tab key to add additional rows.                                                                                                                                                                                                                                                                                                                                         |                                                                                     |  |  |  |  |                                           |  |
| Time frame: past 36 months                         |                                                                                                                                                                                                                                                                                                                                                                                   |                                                                                     |  |  |  |  |                                           |  |
| 2                                                  | <div>Grants or contracts from any entity (if not indicated in item #1 above).</div> <div><input checked="" type="checkbox"/> None</div> <table><tr><td></td><td></td></tr><tr><td></td><td></td></tr><tr><td></td><td></td></tr></table>                                                                                                                                          |                                                                                     |  |  |  |  |                                           |  |
|                                                    |                                                                                                                                                                                                                                                                                                                                                                                   |                                                                                     |  |  |  |  |                                           |  |
|                                                    |                                                                                                                                                                                                                                                                                                                                                                                   |                                                                                     |  |  |  |  |                                           |  |
|                                                    |                                                                                                                                                                                                                                                                                                                                                                                   |                                                                                     |  |  |  |  |                                           |  |
| 3                                                  | <div>Royalties or licenses</div> <div><input checked="" type="checkbox"/> None</div> <table><tr><td></td><td></td></tr><tr><td></td><td></td></tr><tr><td></td><td></td></tr></table>                                                                                                                                                                                             |                                                                                     |  |  |  |  |                                           |  |
|                                                    |                                                                                                                                                                                                                                                                                                                                                                                   |                                                                                     |  |  |  |  |                                           |  |
|                                                    |                                                                                                                                                                                                                                                                                                                                                                                   |                                                                                     |  |  |  |  |                                           |  |
|                                                    |                                                                                                                                                                                                                                                                                                                                                                                   |                                                                                     |  |  |  |  |                                           |  |

|                                                      |                                                                                                              | Name all entities with whom you have this relationship or indicate none (add rows as needed)                                                                                                                            | Specifications/Comments (e.g., if payments were made to you or to your institution) |            |               |  |  |  |  |  |  |
|------------------------------------------------------|--------------------------------------------------------------------------------------------------------------|-------------------------------------------------------------------------------------------------------------------------------------------------------------------------------------------------------------------------|-------------------------------------------------------------------------------------|------------|---------------|--|--|--|--|--|--|
| 4                                                    | Consulting fees                                                                                              | <input type="checkbox"/> None<br><table border="1"> <tr> <td>CereVasc Inc.</td> <td>Made to me</td> </tr> <tr> <td></td> <td></td> </tr> <tr> <td></td> <td></td> </tr> <tr> <td></td> <td></td> </tr> </table>         | CereVasc Inc.                                                                       | Made to me |               |  |  |  |  |  |  |
| CereVasc Inc.                                        | Made to me                                                                                                   |                                                                                                                                                                                                                         |                                                                                     |            |               |  |  |  |  |  |  |
|                                                      |                                                                                                              |                                                                                                                                                                                                                         |                                                                                     |            |               |  |  |  |  |  |  |
|                                                      |                                                                                                              |                                                                                                                                                                                                                         |                                                                                     |            |               |  |  |  |  |  |  |
|                                                      |                                                                                                              |                                                                                                                                                                                                                         |                                                                                     |            |               |  |  |  |  |  |  |
| 5                                                    | Payment or honoraria for lectures, presentations, speakers bureaus, manuscript writing or educational events | <input checked="" type="checkbox"/> None<br><table border="1"> <tr> <td></td> <td></td> </tr> <tr> <td></td> <td></td> </tr> <tr> <td></td> <td></td> </tr> </table>                                                    |                                                                                     |            |               |  |  |  |  |  |  |
|                                                      |                                                                                                              |                                                                                                                                                                                                                         |                                                                                     |            |               |  |  |  |  |  |  |
|                                                      |                                                                                                              |                                                                                                                                                                                                                         |                                                                                     |            |               |  |  |  |  |  |  |
|                                                      |                                                                                                              |                                                                                                                                                                                                                         |                                                                                     |            |               |  |  |  |  |  |  |
| 6                                                    | Payment for expert testimony                                                                                 | <input type="checkbox"/> None<br><table border="1"> <tr> <td>Harvard Risk Management - CRICO</td> <td>Made to me</td> </tr> <tr> <td></td> <td></td> </tr> <tr> <td></td> <td></td> </tr> </table>                      | Harvard Risk Management - CRICO                                                     | Made to me |               |  |  |  |  |  |  |
| Harvard Risk Management - CRICO                      | Made to me                                                                                                   |                                                                                                                                                                                                                         |                                                                                     |            |               |  |  |  |  |  |  |
|                                                      |                                                                                                              |                                                                                                                                                                                                                         |                                                                                     |            |               |  |  |  |  |  |  |
|                                                      |                                                                                                              |                                                                                                                                                                                                                         |                                                                                     |            |               |  |  |  |  |  |  |
| 7                                                    | Support for attending meetings and/or travel                                                                 | <input checked="" type="checkbox"/> None<br><table border="1"> <tr> <td>CereVasc Inc.</td> <td>Made to me</td> </tr> <tr> <td></td> <td></td> </tr> <tr> <td></td> <td></td> </tr> </table>                             | CereVasc Inc.                                                                       | Made to me |               |  |  |  |  |  |  |
| CereVasc Inc.                                        | Made to me                                                                                                   |                                                                                                                                                                                                                         |                                                                                     |            |               |  |  |  |  |  |  |
|                                                      |                                                                                                              |                                                                                                                                                                                                                         |                                                                                     |            |               |  |  |  |  |  |  |
|                                                      |                                                                                                              |                                                                                                                                                                                                                         |                                                                                     |            |               |  |  |  |  |  |  |
| 8                                                    | Patents planned, issued or pending                                                                           | <input type="checkbox"/> None<br><table border="1"> <tr> <td>Unrelated to current manuscript</td> <td></td> </tr> <tr> <td>CereVasc Inc.</td> <td></td> </tr> <tr> <td></td> <td></td> </tr> </table>                   | Unrelated to current manuscript                                                     |            | CereVasc Inc. |  |  |  |  |  |  |
| Unrelated to current manuscript                      |                                                                                                              |                                                                                                                                                                                                                         |                                                                                     |            |               |  |  |  |  |  |  |
| CereVasc Inc.                                        |                                                                                                              |                                                                                                                                                                                                                         |                                                                                     |            |               |  |  |  |  |  |  |
|                                                      |                                                                                                              |                                                                                                                                                                                                                         |                                                                                     |            |               |  |  |  |  |  |  |
| 9                                                    | Participation on a Data Safety Monitoring Board or Advisory Board                                            | <input type="checkbox"/> None<br><table border="1"> <tr> <td>eShunt CereVasc First-in-Human Study (CereVasc Inc.)</td> <td>Made to me</td> </tr> <tr> <td></td> <td></td> </tr> <tr> <td></td> <td></td> </tr> </table> | eShunt CereVasc First-in-Human Study (CereVasc Inc.)                                | Made to me |               |  |  |  |  |  |  |
| eShunt CereVasc First-in-Human Study (CereVasc Inc.) | Made to me                                                                                                   |                                                                                                                                                                                                                         |                                                                                     |            |               |  |  |  |  |  |  |
|                                                      |                                                                                                              |                                                                                                                                                                                                                         |                                                                                     |            |               |  |  |  |  |  |  |
|                                                      |                                                                                                              |                                                                                                                                                                                                                         |                                                                                     |            |               |  |  |  |  |  |  |
| 10                                                   | Leadership or fiduciary role in other board, society, committee or advocacy group, paid or unpaid            | <input checked="" type="checkbox"/> None<br><table border="1"> <tr> <td></td> <td></td> </tr> <tr> <td></td> <td></td> </tr> <tr> <td></td> <td></td> </tr> </table>                                                    |                                                                                     |            |               |  |  |  |  |  |  |
|                                                      |                                                                                                              |                                                                                                                                                                                                                         |                                                                                     |            |               |  |  |  |  |  |  |
|                                                      |                                                                                                              |                                                                                                                                                                                                                         |                                                                                     |            |               |  |  |  |  |  |  |
|                                                      |                                                                                                              |                                                                                                                                                                                                                         |                                                                                     |            |               |  |  |  |  |  |  |

|               |                                                                                  | Name all entities with whom you have this relationship or indicate none (add rows as needed)                                                                         | Specifications/Comments (e.g., if payments were made to you or to your institution) |  |  |  |  |  |  |
|---------------|----------------------------------------------------------------------------------|----------------------------------------------------------------------------------------------------------------------------------------------------------------------|-------------------------------------------------------------------------------------|--|--|--|--|--|--|
| <b>11</b>     | Stock or stock options                                                           | <input type="checkbox"/> <b>None</b><br><table border="1"> <tr><td>CereVasc Inc.</td><td></td></tr> <tr><td></td><td></td></tr> <tr><td></td><td></td></tr> </table> | CereVasc Inc.                                                                       |  |  |  |  |  |  |
| CereVasc Inc. |                                                                                  |                                                                                                                                                                      |                                                                                     |  |  |  |  |  |  |
|               |                                                                                  |                                                                                                                                                                      |                                                                                     |  |  |  |  |  |  |
|               |                                                                                  |                                                                                                                                                                      |                                                                                     |  |  |  |  |  |  |
| <b>12</b>     | Receipt of equipment, materials, drugs, medical writing, gifts or other services | <input checked="" type="checkbox"/> <b>None</b><br><table border="1"> <tr><td></td><td></td></tr> <tr><td></td><td></td></tr> <tr><td></td><td></td></tr> </table>   |                                                                                     |  |  |  |  |  |  |
|               |                                                                                  |                                                                                                                                                                      |                                                                                     |  |  |  |  |  |  |
|               |                                                                                  |                                                                                                                                                                      |                                                                                     |  |  |  |  |  |  |
|               |                                                                                  |                                                                                                                                                                      |                                                                                     |  |  |  |  |  |  |
| <b>13</b>     | Other financial or non-financial interests                                       | <input checked="" type="checkbox"/> <b>None</b><br><table border="1"> <tr><td></td><td></td></tr> <tr><td></td><td></td></tr> <tr><td></td><td></td></tr> </table>   |                                                                                     |  |  |  |  |  |  |
|               |                                                                                  |                                                                                                                                                                      |                                                                                     |  |  |  |  |  |  |
|               |                                                                                  |                                                                                                                                                                      |                                                                                     |  |  |  |  |  |  |
|               |                                                                                  |                                                                                                                                                                      |                                                                                     |  |  |  |  |  |  |

**Please place an "X" next to the following statement to indicate your agreement:**

☒ I certify that I have answered every question and have not altered the wording of any of the questions on this form.

## ICMJE DISCLOSURE FORM

**Date:** 1/26/2022

**Your Name:** Adnan H. Siddiqui MD PhD

**Manuscript Title:** Prospective Study on Embolization of Intracranial Aneurysms with the Pipeline Device (PREMIER study): 3-year results with the application of a flow diverter-specific occlusion classification

**Manuscript Number (if known):** neurintsurg-2021-018501

In the interest of transparency, we ask you to disclose all relationships/activities/interests listed below that are related to the content of your manuscript. "Related" means any relation with for-profit or not-for-profit third parties whose interests may be affected by the content of the manuscript. Disclosure represents a commitment to transparency and does not necessarily indicate a bias. If you are in doubt about whether to list a relationship/activity/interest, it is preferable that you do so.

The author's relationships/activities/interests should be defined broadly. For example, if your manuscript pertains to the epidemiology of hypertension, you should declare all relationships with manufacturers of antihypertensive medication, even if that medication is not mentioned in the manuscript.

In item #1 below, report all support for the work reported in this manuscript without time limit. For all other items, the time frame for disclosure is the past 36 months.

|                                                                                                                                                                                                                                         | Name all entities with whom you have this relationship or indicate none (add rows as needed)                                                                                   | Specifications/Comments (e.g., if payments were made to you or to your institution)                                                                                                                                                                                                                                                                                                                                                                                                                                          |                                                                                                            |             |                                                                                                                                                                                                                                         |  |  |                                           |
|-----------------------------------------------------------------------------------------------------------------------------------------------------------------------------------------------------------------------------------------|--------------------------------------------------------------------------------------------------------------------------------------------------------------------------------|------------------------------------------------------------------------------------------------------------------------------------------------------------------------------------------------------------------------------------------------------------------------------------------------------------------------------------------------------------------------------------------------------------------------------------------------------------------------------------------------------------------------------|------------------------------------------------------------------------------------------------------------|-------------|-----------------------------------------------------------------------------------------------------------------------------------------------------------------------------------------------------------------------------------------|--|--|-------------------------------------------|
| <b>Time frame: Since the initial planning of the work</b>                                                                                                                                                                               |                                                                                                                                                                                |                                                                                                                                                                                                                                                                                                                                                                                                                                                                                                                              |                                                                                                            |             |                                                                                                                                                                                                                                         |  |  |                                           |
| <b>1</b>                                                                                                                                                                                                                                | All support for the present manuscript (e.g., funding, provision of study materials, medical writing, article processing charges, etc.)<br><b>No time limit for this item.</b> | <input checked="" type="checkbox"/> <b>None</b><br><table border="1"> <tr><td></td><td></td></tr> <tr><td></td><td></td></tr> <tr><td></td><td>Click the tab key to add additional rows.</td></tr> </table>                                                                                                                                                                                                                                                                                                                  |                                                                                                            |             |                                                                                                                                                                                                                                         |  |  | Click the tab key to add additional rows. |
|                                                                                                                                                                                                                                         |                                                                                                                                                                                |                                                                                                                                                                                                                                                                                                                                                                                                                                                                                                                              |                                                                                                            |             |                                                                                                                                                                                                                                         |  |  |                                           |
|                                                                                                                                                                                                                                         |                                                                                                                                                                                |                                                                                                                                                                                                                                                                                                                                                                                                                                                                                                                              |                                                                                                            |             |                                                                                                                                                                                                                                         |  |  |                                           |
|                                                                                                                                                                                                                                         | Click the tab key to add additional rows.                                                                                                                                      |                                                                                                                                                                                                                                                                                                                                                                                                                                                                                                                              |                                                                                                            |             |                                                                                                                                                                                                                                         |  |  |                                           |
| <b>Time frame: past 36 months</b>                                                                                                                                                                                                       |                                                                                                                                                                                |                                                                                                                                                                                                                                                                                                                                                                                                                                                                                                                              |                                                                                                            |             |                                                                                                                                                                                                                                         |  |  |                                           |
| <b>2</b>                                                                                                                                                                                                                                | Grants or contracts from any entity (if not indicated in item #1 above).                                                                                                       | <input type="checkbox"/> <b>None</b><br><table border="1"> <tr> <td>Co-investigator for NIH - 1R01EB030092-01, Project Title: High Speed Angiography at 1000 frames per second</td> <td>Institution</td> </tr> <tr> <td>Mentor for Brain Aneurysm Foundation Carol W. Harvey Chair of Research, Sharon Epperson Chair of Research, Project Title: A Whole Blood RNA Diagnostic for Unruptured Brain Aneurysm: Risk Assessment Prototype Development and Testing</td> <td></td> </tr> <tr> <td></td> <td></td> </tr> </table> | Co-investigator for NIH - 1R01EB030092-01, Project Title: High Speed Angiography at 1000 frames per second | Institution | Mentor for Brain Aneurysm Foundation Carol W. Harvey Chair of Research, Sharon Epperson Chair of Research, Project Title: A Whole Blood RNA Diagnostic for Unruptured Brain Aneurysm: Risk Assessment Prototype Development and Testing |  |  |                                           |
| Co-investigator for NIH - 1R01EB030092-01, Project Title: High Speed Angiography at 1000 frames per second                                                                                                                              | Institution                                                                                                                                                                    |                                                                                                                                                                                                                                                                                                                                                                                                                                                                                                                              |                                                                                                            |             |                                                                                                                                                                                                                                         |  |  |                                           |
| Mentor for Brain Aneurysm Foundation Carol W. Harvey Chair of Research, Sharon Epperson Chair of Research, Project Title: A Whole Blood RNA Diagnostic for Unruptured Brain Aneurysm: Risk Assessment Prototype Development and Testing |                                                                                                                                                                                |                                                                                                                                                                                                                                                                                                                                                                                                                                                                                                                              |                                                                                                            |             |                                                                                                                                                                                                                                         |  |  |                                           |
|                                                                                                                                                                                                                                         |                                                                                                                                                                                |                                                                                                                                                                                                                                                                                                                                                                                                                                                                                                                              |                                                                                                            |             |                                                                                                                                                                                                                                         |  |  |                                           |

|          |                                                                                                              | Name all entities with whom you have this relationship or indicate none (add rows as needed) | Specifications/Comments (e.g., if payments were made to you or to your institution) |
|----------|--------------------------------------------------------------------------------------------------------------|----------------------------------------------------------------------------------------------|-------------------------------------------------------------------------------------|
| <b>3</b> | Royalties or licenses                                                                                        | <input checked="" type="checkbox"/> <b>None</b>                                              |                                                                                     |
|          |                                                                                                              |                                                                                              |                                                                                     |
|          |                                                                                                              |                                                                                              |                                                                                     |
|          |                                                                                                              |                                                                                              |                                                                                     |
| <b>4</b> | Consulting fees                                                                                              | <input type="checkbox"/> <b>None</b>                                                         |                                                                                     |
|          |                                                                                                              | Amnis Therapeutics                                                                           | Payments made to me                                                                 |
|          |                                                                                                              | Apellis Pharmaceuticals, Inc.                                                                |                                                                                     |
|          |                                                                                                              | Boston Scientific                                                                            |                                                                                     |
|          |                                                                                                              | Canon Medical Systems USA, Inc.                                                              |                                                                                     |
|          |                                                                                                              | Cardinal Health 200, LLC                                                                     |                                                                                     |
|          |                                                                                                              | Cerebrotech Medical Systems, Inc                                                             |                                                                                     |
|          |                                                                                                              | Cerenovus                                                                                    |                                                                                     |
|          |                                                                                                              | Cerevatech Medical, Inc                                                                      |                                                                                     |
|          |                                                                                                              | Cordis                                                                                       |                                                                                     |
|          |                                                                                                              | Corindus, Inc.                                                                               |                                                                                     |
|          |                                                                                                              | Endostream Medical, Ltd                                                                      |                                                                                     |
|          |                                                                                                              | Imperative Care                                                                              |                                                                                     |
|          |                                                                                                              | Integra                                                                                      |                                                                                     |
|          |                                                                                                              | IRRAS AB                                                                                     |                                                                                     |
|          |                                                                                                              | Medtronic                                                                                    |                                                                                     |
|          |                                                                                                              | MicroVention                                                                                 |                                                                                     |
|          |                                                                                                              | Minnetronix Neuro, Inc.                                                                      |                                                                                     |
|          |                                                                                                              | Penumbra                                                                                     |                                                                                     |
|          |                                                                                                              | Q'Apel Medical, Inc.                                                                         |                                                                                     |
|          |                                                                                                              | Rapid Medical                                                                                |                                                                                     |
|          |                                                                                                              | Serenity Medical Inc.                                                                        |                                                                                     |
|          |                                                                                                              | Silk Road Medical                                                                            |                                                                                     |
|          |                                                                                                              | StimMed, LLC                                                                                 |                                                                                     |
|          |                                                                                                              | Stryker Neurovascular                                                                        |                                                                                     |
|          |                                                                                                              | Three Rivers Medical, Inc.                                                                   |                                                                                     |
|          |                                                                                                              | VasSol                                                                                       |                                                                                     |
|          |                                                                                                              | Viz.ai, Inc.                                                                                 |                                                                                     |
|          |                                                                                                              | W.L. Gore & Associates                                                                       |                                                                                     |
| <b>5</b> | Payment or honoraria for lectures, presentations, speakers bureaus, manuscript writing or educational events | <input checked="" type="checkbox"/> <b>None</b>                                              |                                                                                     |
|          |                                                                                                              |                                                                                              |                                                                                     |
|          |                                                                                                              |                                                                                              |                                                                                     |
|          |                                                                                                              |                                                                                              |                                                                                     |

|                                                                                |                                                                                                   | Name all entities with whom you have this relationship or indicate none (add rows as needed)                                                                                                                                                                                                                                                                                                                                                                                                                                                                                                                                                                                                                                                                                                                                                                                                                                                                                                              | Specifications/Comments (e.g., if payments were made to you or to your institution) |                                                                                |                     |                                                           |            |                            |  |               |  |                                   |  |                           |  |                                  |  |                          |  |                                |  |          |  |                         |  |                        |  |                |  |                                                              |  |                                |  |                                                            |  |
|--------------------------------------------------------------------------------|---------------------------------------------------------------------------------------------------|-----------------------------------------------------------------------------------------------------------------------------------------------------------------------------------------------------------------------------------------------------------------------------------------------------------------------------------------------------------------------------------------------------------------------------------------------------------------------------------------------------------------------------------------------------------------------------------------------------------------------------------------------------------------------------------------------------------------------------------------------------------------------------------------------------------------------------------------------------------------------------------------------------------------------------------------------------------------------------------------------------------|-------------------------------------------------------------------------------------|--------------------------------------------------------------------------------|---------------------|-----------------------------------------------------------|------------|----------------------------|--|---------------|--|-----------------------------------|--|---------------------------|--|----------------------------------|--|--------------------------|--|--------------------------------|--|----------|--|-------------------------|--|------------------------|--|----------------|--|--------------------------------------------------------------|--|--------------------------------|--|------------------------------------------------------------|--|
| 6                                                                              | Payment for expert testimony                                                                      | <input checked="" type="checkbox"/> <b>None</b><br><table border="1"> <tr><td></td><td></td></tr> <tr><td></td><td></td></tr> <tr><td></td><td></td></tr> </table>                                                                                                                                                                                                                                                                                                                                                                                                                                                                                                                                                                                                                                                                                                                                                                                                                                        |                                                                                     |                                                                                |                     |                                                           |            |                            |  |               |  |                                   |  |                           |  |                                  |  |                          |  |                                |  |          |  |                         |  |                        |  |                |  |                                                              |  |                                |  |                                                            |  |
|                                                                                |                                                                                                   |                                                                                                                                                                                                                                                                                                                                                                                                                                                                                                                                                                                                                                                                                                                                                                                                                                                                                                                                                                                                           |                                                                                     |                                                                                |                     |                                                           |            |                            |  |               |  |                                   |  |                           |  |                                  |  |                          |  |                                |  |          |  |                         |  |                        |  |                |  |                                                              |  |                                |  |                                                            |  |
|                                                                                |                                                                                                   |                                                                                                                                                                                                                                                                                                                                                                                                                                                                                                                                                                                                                                                                                                                                                                                                                                                                                                                                                                                                           |                                                                                     |                                                                                |                     |                                                           |            |                            |  |               |  |                                   |  |                           |  |                                  |  |                          |  |                                |  |          |  |                         |  |                        |  |                |  |                                                              |  |                                |  |                                                            |  |
|                                                                                |                                                                                                   |                                                                                                                                                                                                                                                                                                                                                                                                                                                                                                                                                                                                                                                                                                                                                                                                                                                                                                                                                                                                           |                                                                                     |                                                                                |                     |                                                           |            |                            |  |               |  |                                   |  |                           |  |                                  |  |                          |  |                                |  |          |  |                         |  |                        |  |                |  |                                                              |  |                                |  |                                                            |  |
| 7                                                                              | Support for attending meetings and/or travel                                                      | <input checked="" type="checkbox"/> <b>None</b><br><table border="1"> <tr><td></td><td></td></tr> <tr><td></td><td></td></tr> <tr><td></td><td></td></tr> </table>                                                                                                                                                                                                                                                                                                                                                                                                                                                                                                                                                                                                                                                                                                                                                                                                                                        |                                                                                     |                                                                                |                     |                                                           |            |                            |  |               |  |                                   |  |                           |  |                                  |  |                          |  |                                |  |          |  |                         |  |                        |  |                |  |                                                              |  |                                |  |                                                            |  |
|                                                                                |                                                                                                   |                                                                                                                                                                                                                                                                                                                                                                                                                                                                                                                                                                                                                                                                                                                                                                                                                                                                                                                                                                                                           |                                                                                     |                                                                                |                     |                                                           |            |                            |  |               |  |                                   |  |                           |  |                                  |  |                          |  |                                |  |          |  |                         |  |                        |  |                |  |                                                              |  |                                |  |                                                            |  |
|                                                                                |                                                                                                   |                                                                                                                                                                                                                                                                                                                                                                                                                                                                                                                                                                                                                                                                                                                                                                                                                                                                                                                                                                                                           |                                                                                     |                                                                                |                     |                                                           |            |                            |  |               |  |                                   |  |                           |  |                                  |  |                          |  |                                |  |          |  |                         |  |                        |  |                |  |                                                              |  |                                |  |                                                            |  |
|                                                                                |                                                                                                   |                                                                                                                                                                                                                                                                                                                                                                                                                                                                                                                                                                                                                                                                                                                                                                                                                                                                                                                                                                                                           |                                                                                     |                                                                                |                     |                                                           |            |                            |  |               |  |                                   |  |                           |  |                                  |  |                          |  |                                |  |          |  |                         |  |                        |  |                |  |                                                              |  |                                |  |                                                            |  |
| 8                                                                              | Patents planned, issued or pending                                                                | <input checked="" type="checkbox"/> <b>None</b><br><table border="1"> <tr><td></td><td></td></tr> <tr><td></td><td></td></tr> <tr><td></td><td></td></tr> </table>                                                                                                                                                                                                                                                                                                                                                                                                                                                                                                                                                                                                                                                                                                                                                                                                                                        |                                                                                     |                                                                                |                     |                                                           |            |                            |  |               |  |                                   |  |                           |  |                                  |  |                          |  |                                |  |          |  |                         |  |                        |  |                |  |                                                              |  |                                |  |                                                            |  |
|                                                                                |                                                                                                   |                                                                                                                                                                                                                                                                                                                                                                                                                                                                                                                                                                                                                                                                                                                                                                                                                                                                                                                                                                                                           |                                                                                     |                                                                                |                     |                                                           |            |                            |  |               |  |                                   |  |                           |  |                                  |  |                          |  |                                |  |          |  |                         |  |                        |  |                |  |                                                              |  |                                |  |                                                            |  |
|                                                                                |                                                                                                   |                                                                                                                                                                                                                                                                                                                                                                                                                                                                                                                                                                                                                                                                                                                                                                                                                                                                                                                                                                                                           |                                                                                     |                                                                                |                     |                                                           |            |                            |  |               |  |                                   |  |                           |  |                                  |  |                          |  |                                |  |          |  |                         |  |                        |  |                |  |                                                              |  |                                |  |                                                            |  |
|                                                                                |                                                                                                   |                                                                                                                                                                                                                                                                                                                                                                                                                                                                                                                                                                                                                                                                                                                                                                                                                                                                                                                                                                                                           |                                                                                     |                                                                                |                     |                                                           |            |                            |  |               |  |                                   |  |                           |  |                                  |  |                          |  |                                |  |          |  |                         |  |                        |  |                |  |                                                              |  |                                |  |                                                            |  |
| 9                                                                              | Participation on a Data Safety Monitoring Board or Advisory Board                                 | <input checked="" type="checkbox"/> <b>None</b><br><table border="1"> <tr><td></td><td></td></tr> <tr><td></td><td></td></tr> </table>                                                                                                                                                                                                                                                                                                                                                                                                                                                                                                                                                                                                                                                                                                                                                                                                                                                                    |                                                                                     |                                                                                |                     |                                                           |            |                            |  |               |  |                                   |  |                           |  |                                  |  |                          |  |                                |  |          |  |                         |  |                        |  |                |  |                                                              |  |                                |  |                                                            |  |
|                                                                                |                                                                                                   |                                                                                                                                                                                                                                                                                                                                                                                                                                                                                                                                                                                                                                                                                                                                                                                                                                                                                                                                                                                                           |                                                                                     |                                                                                |                     |                                                           |            |                            |  |               |  |                                   |  |                           |  |                                  |  |                          |  |                                |  |          |  |                         |  |                        |  |                |  |                                                              |  |                                |  |                                                            |  |
|                                                                                |                                                                                                   |                                                                                                                                                                                                                                                                                                                                                                                                                                                                                                                                                                                                                                                                                                                                                                                                                                                                                                                                                                                                           |                                                                                     |                                                                                |                     |                                                           |            |                            |  |               |  |                                   |  |                           |  |                                  |  |                          |  |                                |  |          |  |                         |  |                        |  |                |  |                                                              |  |                                |  |                                                            |  |
| 10                                                                             | Leadership or fiduciary role in other board, society, committee or advocacy group, paid or unpaid | <input type="checkbox"/> <b>None</b><br><table border="1"> <tr> <td>Past Secretary – Board of the Society of NeuroInterventional Surgery 2020-2021</td> <td>n/a unpaid</td> </tr> <tr> <td>Chair – Cerebrovascular Section of the AANS/CNS 2020-2021</td> <td>n/a unpaid</td> </tr> <tr> <td></td> <td></td> </tr> </table>                                                                                                                                                                                                                                                                                                                                                                                                                                                                                                                                                                                                                                                                               |                                                                                     | Past Secretary – Board of the Society of NeuroInterventional Surgery 2020-2021 | n/a unpaid          | Chair – Cerebrovascular Section of the AANS/CNS 2020-2021 | n/a unpaid |                            |  |               |  |                                   |  |                           |  |                                  |  |                          |  |                                |  |          |  |                         |  |                        |  |                |  |                                                              |  |                                |  |                                                            |  |
| Past Secretary – Board of the Society of NeuroInterventional Surgery 2020-2021 | n/a unpaid                                                                                        |                                                                                                                                                                                                                                                                                                                                                                                                                                                                                                                                                                                                                                                                                                                                                                                                                                                                                                                                                                                                           |                                                                                     |                                                                                |                     |                                                           |            |                            |  |               |  |                                   |  |                           |  |                                  |  |                          |  |                                |  |          |  |                         |  |                        |  |                |  |                                                              |  |                                |  |                                                            |  |
| Chair – Cerebrovascular Section of the AANS/CNS 2020-2021                      | n/a unpaid                                                                                        |                                                                                                                                                                                                                                                                                                                                                                                                                                                                                                                                                                                                                                                                                                                                                                                                                                                                                                                                                                                                           |                                                                                     |                                                                                |                     |                                                           |            |                            |  |               |  |                                   |  |                           |  |                                  |  |                          |  |                                |  |          |  |                         |  |                        |  |                |  |                                                              |  |                                |  |                                                            |  |
|                                                                                |                                                                                                   |                                                                                                                                                                                                                                                                                                                                                                                                                                                                                                                                                                                                                                                                                                                                                                                                                                                                                                                                                                                                           |                                                                                     |                                                                                |                     |                                                           |            |                            |  |               |  |                                   |  |                           |  |                                  |  |                          |  |                                |  |          |  |                         |  |                        |  |                |  |                                                              |  |                                |  |                                                            |  |
| 11                                                                             | Stock or stock options                                                                            | <input type="checkbox"/> <b>None</b><br><table border="1"> <tr><td>Adona Medical, Inc.</td><td>Payments made to me</td></tr> <tr><td>Amnis Therapeutics</td><td></td></tr> <tr><td>Bend IT Technologies, Ltd.</td><td></td></tr> <tr><td>BlinkTBI, Inc</td><td></td></tr> <tr><td>Buffalo Technology Partners, Inc.</td><td></td></tr> <tr><td>Cardinal Consultants, LLC</td><td></td></tr> <tr><td>Cerebrotech Medical Systems, Inc</td><td></td></tr> <tr><td>Cerevatech Medical, Inc.</td><td></td></tr> <tr><td>Cognition Medical, CVAID Ltd.,</td><td></td></tr> <tr><td>E8, Inc.</td><td></td></tr> <tr><td>Endostream Medical, Ltd</td><td></td></tr> <tr><td>Imperative Care, Inc.,</td><td></td></tr> <tr><td>Instylla, Inc.</td><td></td></tr> <tr><td>International Medical Distribution Partners, Launch NY, Inc.</td><td></td></tr> <tr><td>NeuroRadial Technologies, Inc.</td><td></td></tr> <tr><td>Neurotechnology Investors, Neurovascular Diagnostics, Inc.</td><td></td></tr> </table> |                                                                                     | Adona Medical, Inc.                                                            | Payments made to me | Amnis Therapeutics                                        |            | Bend IT Technologies, Ltd. |  | BlinkTBI, Inc |  | Buffalo Technology Partners, Inc. |  | Cardinal Consultants, LLC |  | Cerebrotech Medical Systems, Inc |  | Cerevatech Medical, Inc. |  | Cognition Medical, CVAID Ltd., |  | E8, Inc. |  | Endostream Medical, Ltd |  | Imperative Care, Inc., |  | Instylla, Inc. |  | International Medical Distribution Partners, Launch NY, Inc. |  | NeuroRadial Technologies, Inc. |  | Neurotechnology Investors, Neurovascular Diagnostics, Inc. |  |
| Adona Medical, Inc.                                                            | Payments made to me                                                                               |                                                                                                                                                                                                                                                                                                                                                                                                                                                                                                                                                                                                                                                                                                                                                                                                                                                                                                                                                                                                           |                                                                                     |                                                                                |                     |                                                           |            |                            |  |               |  |                                   |  |                           |  |                                  |  |                          |  |                                |  |          |  |                         |  |                        |  |                |  |                                                              |  |                                |  |                                                            |  |
| Amnis Therapeutics                                                             |                                                                                                   |                                                                                                                                                                                                                                                                                                                                                                                                                                                                                                                                                                                                                                                                                                                                                                                                                                                                                                                                                                                                           |                                                                                     |                                                                                |                     |                                                           |            |                            |  |               |  |                                   |  |                           |  |                                  |  |                          |  |                                |  |          |  |                         |  |                        |  |                |  |                                                              |  |                                |  |                                                            |  |
| Bend IT Technologies, Ltd.                                                     |                                                                                                   |                                                                                                                                                                                                                                                                                                                                                                                                                                                                                                                                                                                                                                                                                                                                                                                                                                                                                                                                                                                                           |                                                                                     |                                                                                |                     |                                                           |            |                            |  |               |  |                                   |  |                           |  |                                  |  |                          |  |                                |  |          |  |                         |  |                        |  |                |  |                                                              |  |                                |  |                                                            |  |
| BlinkTBI, Inc                                                                  |                                                                                                   |                                                                                                                                                                                                                                                                                                                                                                                                                                                                                                                                                                                                                                                                                                                                                                                                                                                                                                                                                                                                           |                                                                                     |                                                                                |                     |                                                           |            |                            |  |               |  |                                   |  |                           |  |                                  |  |                          |  |                                |  |          |  |                         |  |                        |  |                |  |                                                              |  |                                |  |                                                            |  |
| Buffalo Technology Partners, Inc.                                              |                                                                                                   |                                                                                                                                                                                                                                                                                                                                                                                                                                                                                                                                                                                                                                                                                                                                                                                                                                                                                                                                                                                                           |                                                                                     |                                                                                |                     |                                                           |            |                            |  |               |  |                                   |  |                           |  |                                  |  |                          |  |                                |  |          |  |                         |  |                        |  |                |  |                                                              |  |                                |  |                                                            |  |
| Cardinal Consultants, LLC                                                      |                                                                                                   |                                                                                                                                                                                                                                                                                                                                                                                                                                                                                                                                                                                                                                                                                                                                                                                                                                                                                                                                                                                                           |                                                                                     |                                                                                |                     |                                                           |            |                            |  |               |  |                                   |  |                           |  |                                  |  |                          |  |                                |  |          |  |                         |  |                        |  |                |  |                                                              |  |                                |  |                                                            |  |
| Cerebrotech Medical Systems, Inc                                               |                                                                                                   |                                                                                                                                                                                                                                                                                                                                                                                                                                                                                                                                                                                                                                                                                                                                                                                                                                                                                                                                                                                                           |                                                                                     |                                                                                |                     |                                                           |            |                            |  |               |  |                                   |  |                           |  |                                  |  |                          |  |                                |  |          |  |                         |  |                        |  |                |  |                                                              |  |                                |  |                                                            |  |
| Cerevatech Medical, Inc.                                                       |                                                                                                   |                                                                                                                                                                                                                                                                                                                                                                                                                                                                                                                                                                                                                                                                                                                                                                                                                                                                                                                                                                                                           |                                                                                     |                                                                                |                     |                                                           |            |                            |  |               |  |                                   |  |                           |  |                                  |  |                          |  |                                |  |          |  |                         |  |                        |  |                |  |                                                              |  |                                |  |                                                            |  |
| Cognition Medical, CVAID Ltd.,                                                 |                                                                                                   |                                                                                                                                                                                                                                                                                                                                                                                                                                                                                                                                                                                                                                                                                                                                                                                                                                                                                                                                                                                                           |                                                                                     |                                                                                |                     |                                                           |            |                            |  |               |  |                                   |  |                           |  |                                  |  |                          |  |                                |  |          |  |                         |  |                        |  |                |  |                                                              |  |                                |  |                                                            |  |
| E8, Inc.                                                                       |                                                                                                   |                                                                                                                                                                                                                                                                                                                                                                                                                                                                                                                                                                                                                                                                                                                                                                                                                                                                                                                                                                                                           |                                                                                     |                                                                                |                     |                                                           |            |                            |  |               |  |                                   |  |                           |  |                                  |  |                          |  |                                |  |          |  |                         |  |                        |  |                |  |                                                              |  |                                |  |                                                            |  |
| Endostream Medical, Ltd                                                        |                                                                                                   |                                                                                                                                                                                                                                                                                                                                                                                                                                                                                                                                                                                                                                                                                                                                                                                                                                                                                                                                                                                                           |                                                                                     |                                                                                |                     |                                                           |            |                            |  |               |  |                                   |  |                           |  |                                  |  |                          |  |                                |  |          |  |                         |  |                        |  |                |  |                                                              |  |                                |  |                                                            |  |
| Imperative Care, Inc.,                                                         |                                                                                                   |                                                                                                                                                                                                                                                                                                                                                                                                                                                                                                                                                                                                                                                                                                                                                                                                                                                                                                                                                                                                           |                                                                                     |                                                                                |                     |                                                           |            |                            |  |               |  |                                   |  |                           |  |                                  |  |                          |  |                                |  |          |  |                         |  |                        |  |                |  |                                                              |  |                                |  |                                                            |  |
| Instylla, Inc.                                                                 |                                                                                                   |                                                                                                                                                                                                                                                                                                                                                                                                                                                                                                                                                                                                                                                                                                                                                                                                                                                                                                                                                                                                           |                                                                                     |                                                                                |                     |                                                           |            |                            |  |               |  |                                   |  |                           |  |                                  |  |                          |  |                                |  |          |  |                         |  |                        |  |                |  |                                                              |  |                                |  |                                                            |  |
| International Medical Distribution Partners, Launch NY, Inc.                   |                                                                                                   |                                                                                                                                                                                                                                                                                                                                                                                                                                                                                                                                                                                                                                                                                                                                                                                                                                                                                                                                                                                                           |                                                                                     |                                                                                |                     |                                                           |            |                            |  |               |  |                                   |  |                           |  |                                  |  |                          |  |                                |  |          |  |                         |  |                        |  |                |  |                                                              |  |                                |  |                                                            |  |
| NeuroRadial Technologies, Inc.                                                 |                                                                                                   |                                                                                                                                                                                                                                                                                                                                                                                                                                                                                                                                                                                                                                                                                                                                                                                                                                                                                                                                                                                                           |                                                                                     |                                                                                |                     |                                                           |            |                            |  |               |  |                                   |  |                           |  |                                  |  |                          |  |                                |  |          |  |                         |  |                        |  |                |  |                                                              |  |                                |  |                                                            |  |
| Neurotechnology Investors, Neurovascular Diagnostics, Inc.                     |                                                                                                   |                                                                                                                                                                                                                                                                                                                                                                                                                                                                                                                                                                                                                                                                                                                                                                                                                                                                                                                                                                                                           |                                                                                     |                                                                                |                     |                                                           |            |                            |  |               |  |                                   |  |                           |  |                                  |  |                          |  |                                |  |          |  |                         |  |                        |  |                |  |                                                              |  |                                |  |                                                            |  |

|                                                                                                                                                                                                                                                               |                                                                                  | Name all entities with whom you have this relationship or indicate none (add rows as needed)                                                                                                                                                                                                                                                                             | Specifications/Comments (e.g., if payments were made to you or to your institution) |
|---------------------------------------------------------------------------------------------------------------------------------------------------------------------------------------------------------------------------------------------------------------|----------------------------------------------------------------------------------|--------------------------------------------------------------------------------------------------------------------------------------------------------------------------------------------------------------------------------------------------------------------------------------------------------------------------------------------------------------------------|-------------------------------------------------------------------------------------|
|                                                                                                                                                                                                                                                               |                                                                                  | PerFlow Medical, Ltd.                                                                                                                                                                                                                                                                                                                                                    |                                                                                     |
|                                                                                                                                                                                                                                                               |                                                                                  | Q'Apel Medical, Inc.                                                                                                                                                                                                                                                                                                                                                     |                                                                                     |
|                                                                                                                                                                                                                                                               |                                                                                  | QAS.ai, Inc.                                                                                                                                                                                                                                                                                                                                                             |                                                                                     |
|                                                                                                                                                                                                                                                               |                                                                                  | Radical Catheter Technologies, Inc.                                                                                                                                                                                                                                                                                                                                      |                                                                                     |
|                                                                                                                                                                                                                                                               |                                                                                  | Rebound Therapeutics Corp. (Purchased 2019 by Integra Lifesciences, Corp)                                                                                                                                                                                                                                                                                                |                                                                                     |
|                                                                                                                                                                                                                                                               |                                                                                  | Rist Neurovascular, Inc. (Purchased 2020 by Medtronic)                                                                                                                                                                                                                                                                                                                   |                                                                                     |
|                                                                                                                                                                                                                                                               |                                                                                  | Sense Diagnostics, Inc.                                                                                                                                                                                                                                                                                                                                                  |                                                                                     |
|                                                                                                                                                                                                                                                               |                                                                                  | Serenity Medical, Inc.                                                                                                                                                                                                                                                                                                                                                   |                                                                                     |
|                                                                                                                                                                                                                                                               |                                                                                  | Silk Road Medical                                                                                                                                                                                                                                                                                                                                                        |                                                                                     |
|                                                                                                                                                                                                                                                               |                                                                                  | SongBird Therapy                                                                                                                                                                                                                                                                                                                                                         |                                                                                     |
|                                                                                                                                                                                                                                                               |                                                                                  | Spinnaker Medical, Inc.,                                                                                                                                                                                                                                                                                                                                                 |                                                                                     |
|                                                                                                                                                                                                                                                               |                                                                                  | StimMed, LLC, Synchron, Inc.                                                                                                                                                                                                                                                                                                                                             |                                                                                     |
|                                                                                                                                                                                                                                                               |                                                                                  | Three Rivers Medical, Inc.                                                                                                                                                                                                                                                                                                                                               |                                                                                     |
|                                                                                                                                                                                                                                                               |                                                                                  | Truvic Medical, Inc.                                                                                                                                                                                                                                                                                                                                                     |                                                                                     |
|                                                                                                                                                                                                                                                               |                                                                                  | Tulavi Therapeutics, Inc.                                                                                                                                                                                                                                                                                                                                                |                                                                                     |
|                                                                                                                                                                                                                                                               |                                                                                  | Vastrax, LLC                                                                                                                                                                                                                                                                                                                                                             |                                                                                     |
|                                                                                                                                                                                                                                                               |                                                                                  | VICIS, Inc.                                                                                                                                                                                                                                                                                                                                                              |                                                                                     |
|                                                                                                                                                                                                                                                               |                                                                                  | Viseon, Inc.                                                                                                                                                                                                                                                                                                                                                             |                                                                                     |
| 12                                                                                                                                                                                                                                                            | Receipt of equipment, materials, drugs, medical writing, gifts or other services | <input checked="" type="checkbox"/> <b>None</b>                                                                                                                                                                                                                                                                                                                          |                                                                                     |
|                                                                                                                                                                                                                                                               |                                                                                  |                                                                                                                                                                                                                                                                                                                                                                          |                                                                                     |
|                                                                                                                                                                                                                                                               |                                                                                  |                                                                                                                                                                                                                                                                                                                                                                          |                                                                                     |
| 13                                                                                                                                                                                                                                                            | Other financial or non-financial interests                                       | <input type="checkbox"/> <b>None</b>                                                                                                                                                                                                                                                                                                                                     |                                                                                     |
|                                                                                                                                                                                                                                                               |                                                                                  | National PI/Steering Committees: Cerenovus EXCELLENT and ARISE II Trial; Medtronic SWIFT PRIME, VANTAGE, EMBOLISE and SWIFT DIRECT Trials; MicroVention FRED Trial & CONFIDENCE Study; MUSC POSITIVE Trial; Penumbra 3D Separator Trial, COMPASS Trial, INVEST Trial, MIVI neuroscience EVAQ Trial; Rapid Medical SUCCESS Trial; InspireMD C-GUARDIANS IDE Pivotal Trial | Payments made to me                                                                 |
|                                                                                                                                                                                                                                                               |                                                                                  |                                                                                                                                                                                                                                                                                                                                                                          |                                                                                     |
|                                                                                                                                                                                                                                                               |                                                                                  |                                                                                                                                                                                                                                                                                                                                                                          |                                                                                     |
| <p><b>Please place an "X" next to the following statement to indicate your agreement:</b></p> <p><input checked="" type="checkbox"/> I certify that I have answered every question and have not altered the wording of any of the questions on this form.</p> |                                                                                  |                                                                                                                                                                                                                                                                                                                                                                          |                                                                                     |

## ICMJE DISCLOSURE FORM

Date:

Click or tap to enter a date.

1/13/2022

Your Name:

Click or tap here to enter text.

ADIT S. PURI

Manuscript Title:

Prospective Study on Embolization of Intracranial Aneurysms with the Pipeline Device (PREMIER study): 3-year results with the application of a flow diverter-specific occlusion classification

Manuscript Number (if known):

neurintsurg-2021-018501

In the interest of transparency, we ask you to disclose all relationships/activities/interests listed below that are related to the content of your manuscript. "Related" means any relation with for-profit or not-for-profit third parties whose interests may be affected by the content of the manuscript. Disclosure represents a commitment to transparency and does not necessarily indicate a bias. If you are in doubt about whether to list a relationship/activity/interest, it is preferable that you do so.

The author's relationships/activities/interests should be defined broadly. For example, if your manuscript pertains to the epidemiology of hypertension, you should declare all relationships with manufacturers of antihypertensive medication, even if that medication is not mentioned in the manuscript.

In item #1 below, report all support for the work reported in this manuscript without time limit. For all other items, the time frame for disclosure is the past 36 months.

|                                                    | Name all entities with whom you have this relationship or indicate none (add rows as needed)                                                                            | Specifications/Comments (e.g., if payments were made to you or to your institution)           |
|----------------------------------------------------|-------------------------------------------------------------------------------------------------------------------------------------------------------------------------|-----------------------------------------------------------------------------------------------|
| Time frame: Since the initial planning of the work |                                                                                                                                                                         |                                                                                               |
| 1                                                  | <input checked="" type="checkbox"/> None<br><div> <div></div> <div></div> <div></div> </div>                                                                            |                                                                                               |
|                                                    | All support for the present manuscript (e.g., funding, provision of study materials, medical writing, article processing charges, etc.)<br>No time limit for this item. |                                                                                               |
| Time frame: past 36 months                         |                                                                                                                                                                         |                                                                                               |
| 2                                                  | <input type="checkbox"/> None<br><div> <div></div> <div></div> <div></div> </div>                                                                                       | <div>Medtronic, Stryker, Cerenovus research grants</div> <div>(Payments to Institution)</div> |
|                                                    | Grants or contracts from any entity (if not indicated in item #1 above).                                                                                                |                                                                                               |
| 3                                                  | <input checked="" type="checkbox"/> None<br><div> <div></div> <div></div> <div></div> </div>                                                                            |                                                                                               |
|                                                    | Royalties or licenses                                                                                                                                                   |                                                                                               |



|    |                                                                                                              | Name all entities with whom you have this relationship or indicate none (add rows as needed)                 | Specifications/Comments (e.g., if payments were made to you or to your institution) |
|----|--------------------------------------------------------------------------------------------------------------|--------------------------------------------------------------------------------------------------------------|-------------------------------------------------------------------------------------|
| 4  | Consulting fees                                                                                              | <input type="checkbox"/> None<br>Microvention, Agile, Merit,<br>Corindus, QApel, Arsenal,<br>Imperative Care | } Payments to me.                                                                   |
| 5  | Payment or honoraria for lectures, presentations, speakers bureaus, manuscript writing or educational events | <input checked="" type="checkbox"/> None                                                                     |                                                                                     |
| 6  | Payment for expert testimony                                                                                 | <input checked="" type="checkbox"/> None                                                                     |                                                                                     |
| 7  | Support for attending meetings and/or travel                                                                 | <input checked="" type="checkbox"/> None                                                                     |                                                                                     |
| 8  | Patents planned, issued or pending                                                                           | <input checked="" type="checkbox"/> None                                                                     |                                                                                     |
| 9  | Participation on a Data Safety Monitoring Board or Advisory Board                                            | <input type="checkbox"/> None<br>CereVasc                                                                    | Payments to me                                                                      |
| 10 | Leadership or fiduciary role in other board, society, committee or advocacy group, paid or unpaid            | <input checked="" type="checkbox"/> None                                                                     |                                                                                     |

|    |                                                                                  | Name all entities with whom you have this relationship or indicate none (add rows as needed) | Specifications/Comments (e.g., if payments were made to you or to your institution) |
|----|----------------------------------------------------------------------------------|----------------------------------------------------------------------------------------------|-------------------------------------------------------------------------------------|
| 11 | Stock or stock options                                                           | <input type="checkbox"/> None<br><i>InNeuroCo, Galaxy, NTI, Perfuse, Agile</i>               | <i>me</i>                                                                           |
| 12 | Receipt of equipment, materials, drugs, medical writing, gifts or other services | <input checked="" type="checkbox"/> None                                                     |                                                                                     |
| 13 | Other financial or non-financial interests                                       | <input checked="" type="checkbox"/> None                                                     |                                                                                     |

Please place an "X" next to the following statement to indicate your agreement:

☒ I certify that I have answered every question and have not altered the wording of any of the questions on this form.

*Ajit Singh Puri*

## ICMJE DISCLOSURE FORM

**Date:** 1/13/2022

**Your Name:** Beverly Aagaard Kienitz

**Manuscript Title:** Prospective Study on Embolization of Intracranial Aneurysms with the Pipeline Device (PREMIER study): 3-year results with the application of a flow diverter-specific occlusion classification

**Manuscript Number (if known):** neurintsurg-2021-018501

In the interest of transparency, we ask you to disclose all relationships/activities/interests listed below that are related to the content of your manuscript. "Related" means any relation with for-profit or not-for-profit third parties whose interests may be affected by the content of the manuscript. Disclosure represents a commitment to transparency and does not necessarily indicate a bias. If you are in doubt about whether to list a relationship/activity/interest, it is preferable that you do so.

The author's relationships/activities/interests should be defined broadly. For example, if your manuscript pertains to the epidemiology of hypertension, you should declare all relationships with manufacturers of antihypertensive medication, even if that medication is not mentioned in the manuscript.

In item #1 below, report all support for the work reported in this manuscript without time limit. For all other items, the time frame for disclosure is the past 36 months.

|                                                           | Name all entities with whom you have this relationship or indicate none (add rows as needed)                                                                                   | Specifications/Comments (e.g., if payments were made to you or to your institution)                                                                                                                                                                                                |           |                                                                  |  |  |  |                                           |
|-----------------------------------------------------------|--------------------------------------------------------------------------------------------------------------------------------------------------------------------------------|------------------------------------------------------------------------------------------------------------------------------------------------------------------------------------------------------------------------------------------------------------------------------------|-----------|------------------------------------------------------------------|--|--|--|-------------------------------------------|
| <b>Time frame: Since the initial planning of the work</b> |                                                                                                                                                                                |                                                                                                                                                                                                                                                                                    |           |                                                                  |  |  |  |                                           |
| <b>1</b>                                                  | All support for the present manuscript (e.g., funding, provision of study materials, medical writing, article processing charges, etc.)<br><b>No time limit for this item.</b> | <input type="checkbox"/> <b>None</b><br><table border="1"> <tr> <td>Medtronic</td> <td>Payments to institution for trial work—no funding for manuscript</td> </tr> <tr> <td></td> <td></td> </tr> <tr> <td></td> <td>Click the tab key to add additional rows.</td> </tr> </table> | Medtronic | Payments to institution for trial work—no funding for manuscript |  |  |  | Click the tab key to add additional rows. |
| Medtronic                                                 | Payments to institution for trial work—no funding for manuscript                                                                                                               |                                                                                                                                                                                                                                                                                    |           |                                                                  |  |  |  |                                           |
|                                                           |                                                                                                                                                                                |                                                                                                                                                                                                                                                                                    |           |                                                                  |  |  |  |                                           |
|                                                           | Click the tab key to add additional rows.                                                                                                                                      |                                                                                                                                                                                                                                                                                    |           |                                                                  |  |  |  |                                           |
| <b>Time frame: past 36 months</b>                         |                                                                                                                                                                                |                                                                                                                                                                                                                                                                                    |           |                                                                  |  |  |  |                                           |
| <b>2</b>                                                  | Grants or contracts from any entity (if not indicated in item #1 above).                                                                                                       | <input checked="" type="checkbox"/> <b>None</b><br><table border="1"> <tr><td></td><td></td></tr> <tr><td></td><td></td></tr> <tr><td></td><td></td></tr> </table>                                                                                                                 |           |                                                                  |  |  |  |                                           |
|                                                           |                                                                                                                                                                                |                                                                                                                                                                                                                                                                                    |           |                                                                  |  |  |  |                                           |
|                                                           |                                                                                                                                                                                |                                                                                                                                                                                                                                                                                    |           |                                                                  |  |  |  |                                           |
|                                                           |                                                                                                                                                                                |                                                                                                                                                                                                                                                                                    |           |                                                                  |  |  |  |                                           |
| <b>3</b>                                                  | Royalties or licenses                                                                                                                                                          | <input checked="" type="checkbox"/> <b>None</b><br><table border="1"> <tr><td></td><td></td></tr> <tr><td></td><td></td></tr> <tr><td></td><td></td></tr> </table>                                                                                                                 |           |                                                                  |  |  |  |                                           |
|                                                           |                                                                                                                                                                                |                                                                                                                                                                                                                                                                                    |           |                                                                  |  |  |  |                                           |
|                                                           |                                                                                                                                                                                |                                                                                                                                                                                                                                                                                    |           |                                                                  |  |  |  |                                           |
|                                                           |                                                                                                                                                                                |                                                                                                                                                                                                                                                                                    |           |                                                                  |  |  |  |                                           |

|    |                                                                                                              | Name all entities with whom you have this relationship or indicate none (add rows as needed)                                                                                                   | Specifications/Comments (e.g., if payments were made to you or to your institution) |  |  |  |  |  |  |  |  |
|----|--------------------------------------------------------------------------------------------------------------|------------------------------------------------------------------------------------------------------------------------------------------------------------------------------------------------|-------------------------------------------------------------------------------------|--|--|--|--|--|--|--|--|
| 4  | Consulting fees                                                                                              | <input checked="" type="checkbox"/> <b>None</b><br><table border="1"> <tr><td></td><td></td></tr> <tr><td></td><td></td></tr> <tr><td></td><td></td></tr> <tr><td></td><td></td></tr> </table> |                                                                                     |  |  |  |  |  |  |  |  |
|    |                                                                                                              |                                                                                                                                                                                                |                                                                                     |  |  |  |  |  |  |  |  |
|    |                                                                                                              |                                                                                                                                                                                                |                                                                                     |  |  |  |  |  |  |  |  |
|    |                                                                                                              |                                                                                                                                                                                                |                                                                                     |  |  |  |  |  |  |  |  |
|    |                                                                                                              |                                                                                                                                                                                                |                                                                                     |  |  |  |  |  |  |  |  |
| 5  | Payment or honoraria for lectures, presentations, speakers bureaus, manuscript writing or educational events | <input checked="" type="checkbox"/> <b>None</b><br><table border="1"> <tr><td></td><td></td></tr> <tr><td></td><td></td></tr> <tr><td></td><td></td></tr> </table>                             |                                                                                     |  |  |  |  |  |  |  |  |
|    |                                                                                                              |                                                                                                                                                                                                |                                                                                     |  |  |  |  |  |  |  |  |
|    |                                                                                                              |                                                                                                                                                                                                |                                                                                     |  |  |  |  |  |  |  |  |
|    |                                                                                                              |                                                                                                                                                                                                |                                                                                     |  |  |  |  |  |  |  |  |
| 6  | Payment for expert testimony                                                                                 | <input checked="" type="checkbox"/> <b>None</b><br><table border="1"> <tr><td></td><td></td></tr> <tr><td></td><td></td></tr> <tr><td></td><td></td></tr> </table>                             |                                                                                     |  |  |  |  |  |  |  |  |
|    |                                                                                                              |                                                                                                                                                                                                |                                                                                     |  |  |  |  |  |  |  |  |
|    |                                                                                                              |                                                                                                                                                                                                |                                                                                     |  |  |  |  |  |  |  |  |
|    |                                                                                                              |                                                                                                                                                                                                |                                                                                     |  |  |  |  |  |  |  |  |
| 7  | Support for attending meetings and/or travel                                                                 | <input checked="" type="checkbox"/> <b>None</b><br><table border="1"> <tr><td></td><td></td></tr> <tr><td></td><td></td></tr> <tr><td></td><td></td></tr> </table>                             |                                                                                     |  |  |  |  |  |  |  |  |
|    |                                                                                                              |                                                                                                                                                                                                |                                                                                     |  |  |  |  |  |  |  |  |
|    |                                                                                                              |                                                                                                                                                                                                |                                                                                     |  |  |  |  |  |  |  |  |
|    |                                                                                                              |                                                                                                                                                                                                |                                                                                     |  |  |  |  |  |  |  |  |
| 8  | Patents planned, issued or pending                                                                           | <input checked="" type="checkbox"/> <b>None</b><br><table border="1"> <tr><td></td><td></td></tr> <tr><td></td><td></td></tr> <tr><td></td><td></td></tr> </table>                             |                                                                                     |  |  |  |  |  |  |  |  |
|    |                                                                                                              |                                                                                                                                                                                                |                                                                                     |  |  |  |  |  |  |  |  |
|    |                                                                                                              |                                                                                                                                                                                                |                                                                                     |  |  |  |  |  |  |  |  |
|    |                                                                                                              |                                                                                                                                                                                                |                                                                                     |  |  |  |  |  |  |  |  |
| 9  | Participation on a Data Safety Monitoring Board or Advisory Board                                            | <input checked="" type="checkbox"/> <b>None</b><br><table border="1"> <tr><td></td><td></td></tr> <tr><td></td><td></td></tr> <tr><td></td><td></td></tr> </table>                             |                                                                                     |  |  |  |  |  |  |  |  |
|    |                                                                                                              |                                                                                                                                                                                                |                                                                                     |  |  |  |  |  |  |  |  |
|    |                                                                                                              |                                                                                                                                                                                                |                                                                                     |  |  |  |  |  |  |  |  |
|    |                                                                                                              |                                                                                                                                                                                                |                                                                                     |  |  |  |  |  |  |  |  |
| 10 | Leadership or fiduciary role in other board, society, committee or advocacy group, paid or unpaid            | <input checked="" type="checkbox"/> <b>None</b><br><table border="1"> <tr><td></td><td></td></tr> <tr><td></td><td></td></tr> <tr><td></td><td></td></tr> </table>                             |                                                                                     |  |  |  |  |  |  |  |  |
|    |                                                                                                              |                                                                                                                                                                                                |                                                                                     |  |  |  |  |  |  |  |  |
|    |                                                                                                              |                                                                                                                                                                                                |                                                                                     |  |  |  |  |  |  |  |  |
|    |                                                                                                              |                                                                                                                                                                                                |                                                                                     |  |  |  |  |  |  |  |  |

|                                                                                                                                                                                                                                                               |                                                                                  | Name all entities with whom you have this relationship or indicate none (add rows as needed)                                                                                                    | Specifications/Comments (e.g., if payments were made to you or to your institution) |  |  |  |  |  |  |
|---------------------------------------------------------------------------------------------------------------------------------------------------------------------------------------------------------------------------------------------------------------|----------------------------------------------------------------------------------|-------------------------------------------------------------------------------------------------------------------------------------------------------------------------------------------------|-------------------------------------------------------------------------------------|--|--|--|--|--|--|
| <b>11</b>                                                                                                                                                                                                                                                     | Stock or stock options                                                           | <input checked="" type="checkbox"/> <b>None</b><br><table border="1" data-bbox="415 342 1437 434"> <tr><td></td><td></td></tr> <tr><td></td><td></td></tr> <tr><td></td><td></td></tr> </table> |                                                                                     |  |  |  |  |  |  |
|                                                                                                                                                                                                                                                               |                                                                                  |                                                                                                                                                                                                 |                                                                                     |  |  |  |  |  |  |
|                                                                                                                                                                                                                                                               |                                                                                  |                                                                                                                                                                                                 |                                                                                     |  |  |  |  |  |  |
|                                                                                                                                                                                                                                                               |                                                                                  |                                                                                                                                                                                                 |                                                                                     |  |  |  |  |  |  |
| <b>12</b>                                                                                                                                                                                                                                                     | Receipt of equipment, materials, drugs, medical writing, gifts or other services | <input checked="" type="checkbox"/> <b>None</b><br><table border="1" data-bbox="415 537 1437 630"> <tr><td></td><td></td></tr> <tr><td></td><td></td></tr> <tr><td></td><td></td></tr> </table> |                                                                                     |  |  |  |  |  |  |
|                                                                                                                                                                                                                                                               |                                                                                  |                                                                                                                                                                                                 |                                                                                     |  |  |  |  |  |  |
|                                                                                                                                                                                                                                                               |                                                                                  |                                                                                                                                                                                                 |                                                                                     |  |  |  |  |  |  |
|                                                                                                                                                                                                                                                               |                                                                                  |                                                                                                                                                                                                 |                                                                                     |  |  |  |  |  |  |
| <b>13</b>                                                                                                                                                                                                                                                     | Other financial or non-financial interests                                       | <input checked="" type="checkbox"/> <b>None</b><br><table border="1" data-bbox="415 732 1437 825"> <tr><td></td><td></td></tr> <tr><td></td><td></td></tr> <tr><td></td><td></td></tr> </table> |                                                                                     |  |  |  |  |  |  |
|                                                                                                                                                                                                                                                               |                                                                                  |                                                                                                                                                                                                 |                                                                                     |  |  |  |  |  |  |
|                                                                                                                                                                                                                                                               |                                                                                  |                                                                                                                                                                                                 |                                                                                     |  |  |  |  |  |  |
|                                                                                                                                                                                                                                                               |                                                                                  |                                                                                                                                                                                                 |                                                                                     |  |  |  |  |  |  |
| <p><b>Please place an "X" next to the following statement to indicate your agreement:</b></p> <p><input checked="" type="checkbox"/> I certify that I have answered every question and have not altered the wording of any of the questions on this form.</p> |                                                                                  |                                                                                                                                                                                                 |                                                                                     |  |  |  |  |  |  |

## ICMJE DISCLOSURE FORM

**Date:** 1/15/2022

**Your Name:** Chetan Bettegowda

**Manuscript Title:** Prospective Study on Embolization of Intracranial Aneurysms with the Pipeline Device (PREMIER study): 3-year results with the application of a flow diverter-specific occlusion classification

**Manuscript Number (if known):** neurintsurg-2021-018501

In the interest of transparency, we ask you to disclose all relationships/activities/interests listed below that are related to the content of your manuscript. "Related" means any relation with for-profit or not-for-profit third parties whose interests may be affected by the content of the manuscript. Disclosure represents a commitment to transparency and does not necessarily indicate a bias. If you are in doubt about whether to list a relationship/activity/interest, it is preferable that you do so.

The author's relationships/activities/interests should be defined broadly. For example, if your manuscript pertains to the epidemiology of hypertension, you should declare all relationships with manufacturers of antihypertensive medication, even if that medication is not mentioned in the manuscript.

In item #1 below, report all support for the work reported in this manuscript without time limit. For all other items, the time frame for disclosure is the past 36 months.

|                                                           | Name all entities with whom you have this relationship or indicate none (add rows as needed)                                                                                   | Specifications/Comments (e.g., if payments were made to you or to your institution)                                                                                                                         |  |  |  |  |  |                                           |
|-----------------------------------------------------------|--------------------------------------------------------------------------------------------------------------------------------------------------------------------------------|-------------------------------------------------------------------------------------------------------------------------------------------------------------------------------------------------------------|--|--|--|--|--|-------------------------------------------|
| <b>Time frame: Since the initial planning of the work</b> |                                                                                                                                                                                |                                                                                                                                                                                                             |  |  |  |  |  |                                           |
| <b>1</b>                                                  | All support for the present manuscript (e.g., funding, provision of study materials, medical writing, article processing charges, etc.)<br><b>No time limit for this item.</b> | <input checked="" type="checkbox"/> <b>None</b><br><table border="1"> <tr><td></td><td></td></tr> <tr><td></td><td></td></tr> <tr><td></td><td>Click the tab key to add additional rows.</td></tr> </table> |  |  |  |  |  | Click the tab key to add additional rows. |
|                                                           |                                                                                                                                                                                |                                                                                                                                                                                                             |  |  |  |  |  |                                           |
|                                                           |                                                                                                                                                                                |                                                                                                                                                                                                             |  |  |  |  |  |                                           |
|                                                           | Click the tab key to add additional rows.                                                                                                                                      |                                                                                                                                                                                                             |  |  |  |  |  |                                           |
| <b>Time frame: past 36 months</b>                         |                                                                                                                                                                                |                                                                                                                                                                                                             |  |  |  |  |  |                                           |
| <b>2</b>                                                  | Grants or contracts from any entity (if not indicated in item #1 above).                                                                                                       | <input checked="" type="checkbox"/> <b>None</b><br><table border="1"> <tr><td></td><td></td></tr> <tr><td></td><td></td></tr> <tr><td></td><td></td></tr> </table>                                          |  |  |  |  |  |                                           |
|                                                           |                                                                                                                                                                                |                                                                                                                                                                                                             |  |  |  |  |  |                                           |
|                                                           |                                                                                                                                                                                |                                                                                                                                                                                                             |  |  |  |  |  |                                           |
|                                                           |                                                                                                                                                                                |                                                                                                                                                                                                             |  |  |  |  |  |                                           |
| <b>3</b>                                                  | Royalties or licenses                                                                                                                                                          | <input checked="" type="checkbox"/> <b>None</b><br><table border="1"> <tr><td></td><td></td></tr> <tr><td></td><td></td></tr> <tr><td></td><td></td></tr> </table>                                          |  |  |  |  |  |                                           |
|                                                           |                                                                                                                                                                                |                                                                                                                                                                                                             |  |  |  |  |  |                                           |
|                                                           |                                                                                                                                                                                |                                                                                                                                                                                                             |  |  |  |  |  |                                           |
|                                                           |                                                                                                                                                                                |                                                                                                                                                                                                             |  |  |  |  |  |                                           |

|                                        |                                                                                                              | Name all entities with whom you have this relationship or indicate none (add rows as needed)                                                                                                                                                                                  | Specifications/Comments (e.g., if payments were made to you or to your institution) |  |                               |  |                                        |  |  |  |  |
|----------------------------------------|--------------------------------------------------------------------------------------------------------------|-------------------------------------------------------------------------------------------------------------------------------------------------------------------------------------------------------------------------------------------------------------------------------|-------------------------------------------------------------------------------------|--|-------------------------------|--|----------------------------------------|--|--|--|--|
| 4                                      | Consulting fees                                                                                              | <input type="checkbox"/> None<br><table border="1"> <tr><td>Depuy-Synthes – payments to me</td><td></td></tr> <tr><td>Bionaut Labs – payments to me</td><td></td></tr> <tr><td>Galectin Therapeutics – payments to me</td><td></td></tr> <tr><td></td><td></td></tr> </table> | Depuy-Synthes – payments to me                                                      |  | Bionaut Labs – payments to me |  | Galectin Therapeutics – payments to me |  |  |  |  |
| Depuy-Synthes – payments to me         |                                                                                                              |                                                                                                                                                                                                                                                                               |                                                                                     |  |                               |  |                                        |  |  |  |  |
| Bionaut Labs – payments to me          |                                                                                                              |                                                                                                                                                                                                                                                                               |                                                                                     |  |                               |  |                                        |  |  |  |  |
| Galectin Therapeutics – payments to me |                                                                                                              |                                                                                                                                                                                                                                                                               |                                                                                     |  |                               |  |                                        |  |  |  |  |
|                                        |                                                                                                              |                                                                                                                                                                                                                                                                               |                                                                                     |  |                               |  |                                        |  |  |  |  |
| 5                                      | Payment or honoraria for lectures, presentations, speakers bureaus, manuscript writing or educational events | <input checked="" type="checkbox"/> None<br><table border="1"> <tr><td></td><td></td></tr> <tr><td></td><td></td></tr> <tr><td></td><td></td></tr> </table>                                                                                                                   |                                                                                     |  |                               |  |                                        |  |  |  |  |
|                                        |                                                                                                              |                                                                                                                                                                                                                                                                               |                                                                                     |  |                               |  |                                        |  |  |  |  |
|                                        |                                                                                                              |                                                                                                                                                                                                                                                                               |                                                                                     |  |                               |  |                                        |  |  |  |  |
|                                        |                                                                                                              |                                                                                                                                                                                                                                                                               |                                                                                     |  |                               |  |                                        |  |  |  |  |
| 6                                      | Payment for expert testimony                                                                                 | <input checked="" type="checkbox"/> None<br><table border="1"> <tr><td></td><td></td></tr> <tr><td></td><td></td></tr> <tr><td></td><td></td></tr> </table>                                                                                                                   |                                                                                     |  |                               |  |                                        |  |  |  |  |
|                                        |                                                                                                              |                                                                                                                                                                                                                                                                               |                                                                                     |  |                               |  |                                        |  |  |  |  |
|                                        |                                                                                                              |                                                                                                                                                                                                                                                                               |                                                                                     |  |                               |  |                                        |  |  |  |  |
|                                        |                                                                                                              |                                                                                                                                                                                                                                                                               |                                                                                     |  |                               |  |                                        |  |  |  |  |
| 7                                      | Support for attending meetings and/or travel                                                                 | <input checked="" type="checkbox"/> None<br><table border="1"> <tr><td></td><td></td></tr> <tr><td></td><td></td></tr> <tr><td></td><td></td></tr> </table>                                                                                                                   |                                                                                     |  |                               |  |                                        |  |  |  |  |
|                                        |                                                                                                              |                                                                                                                                                                                                                                                                               |                                                                                     |  |                               |  |                                        |  |  |  |  |
|                                        |                                                                                                              |                                                                                                                                                                                                                                                                               |                                                                                     |  |                               |  |                                        |  |  |  |  |
|                                        |                                                                                                              |                                                                                                                                                                                                                                                                               |                                                                                     |  |                               |  |                                        |  |  |  |  |
| 8                                      | Patents planned, issued or pending                                                                           | <input checked="" type="checkbox"/> None<br><table border="1"> <tr><td></td><td></td></tr> <tr><td></td><td></td></tr> <tr><td></td><td></td></tr> </table>                                                                                                                   |                                                                                     |  |                               |  |                                        |  |  |  |  |
|                                        |                                                                                                              |                                                                                                                                                                                                                                                                               |                                                                                     |  |                               |  |                                        |  |  |  |  |
|                                        |                                                                                                              |                                                                                                                                                                                                                                                                               |                                                                                     |  |                               |  |                                        |  |  |  |  |
|                                        |                                                                                                              |                                                                                                                                                                                                                                                                               |                                                                                     |  |                               |  |                                        |  |  |  |  |
| 9                                      | Participation on a Data Safety Monitoring Board or Advisory Board                                            | <input checked="" type="checkbox"/> None<br><table border="1"> <tr><td></td><td></td></tr> <tr><td></td><td></td></tr> <tr><td></td><td></td></tr> </table>                                                                                                                   |                                                                                     |  |                               |  |                                        |  |  |  |  |
|                                        |                                                                                                              |                                                                                                                                                                                                                                                                               |                                                                                     |  |                               |  |                                        |  |  |  |  |
|                                        |                                                                                                              |                                                                                                                                                                                                                                                                               |                                                                                     |  |                               |  |                                        |  |  |  |  |
|                                        |                                                                                                              |                                                                                                                                                                                                                                                                               |                                                                                     |  |                               |  |                                        |  |  |  |  |
| 10                                     | Leadership or fiduciary role in other board, society, committee or advocacy group, paid or unpaid            | <input checked="" type="checkbox"/> None<br><table border="1"> <tr><td></td><td></td></tr> <tr><td></td><td></td></tr> <tr><td></td><td></td></tr> </table>                                                                                                                   |                                                                                     |  |                               |  |                                        |  |  |  |  |
|                                        |                                                                                                              |                                                                                                                                                                                                                                                                               |                                                                                     |  |                               |  |                                        |  |  |  |  |
|                                        |                                                                                                              |                                                                                                                                                                                                                                                                               |                                                                                     |  |                               |  |                                        |  |  |  |  |
|                                        |                                                                                                              |                                                                                                                                                                                                                                                                               |                                                                                     |  |                               |  |                                        |  |  |  |  |

|           |                                                                                  | Name all entities with whom you have this relationship or indicate none (add rows as needed)                                                                       | Specifications/Comments (e.g., if payments were made to you or to your institution) |  |  |  |  |  |  |
|-----------|----------------------------------------------------------------------------------|--------------------------------------------------------------------------------------------------------------------------------------------------------------------|-------------------------------------------------------------------------------------|--|--|--|--|--|--|
| <b>11</b> | Stock or stock options                                                           | <input checked="" type="checkbox"/> <b>None</b><br><table border="1"> <tr><td></td><td></td></tr> <tr><td></td><td></td></tr> <tr><td></td><td></td></tr> </table> |                                                                                     |  |  |  |  |  |  |
|           |                                                                                  |                                                                                                                                                                    |                                                                                     |  |  |  |  |  |  |
|           |                                                                                  |                                                                                                                                                                    |                                                                                     |  |  |  |  |  |  |
|           |                                                                                  |                                                                                                                                                                    |                                                                                     |  |  |  |  |  |  |
| <b>12</b> | Receipt of equipment, materials, drugs, medical writing, gifts or other services | <input checked="" type="checkbox"/> <b>None</b><br><table border="1"> <tr><td></td><td></td></tr> <tr><td></td><td></td></tr> <tr><td></td><td></td></tr> </table> |                                                                                     |  |  |  |  |  |  |
|           |                                                                                  |                                                                                                                                                                    |                                                                                     |  |  |  |  |  |  |
|           |                                                                                  |                                                                                                                                                                    |                                                                                     |  |  |  |  |  |  |
|           |                                                                                  |                                                                                                                                                                    |                                                                                     |  |  |  |  |  |  |
| <b>13</b> | Other financial or non-financial interests                                       | <input checked="" type="checkbox"/> <b>None</b><br><table border="1"> <tr><td></td><td></td></tr> <tr><td></td><td></td></tr> <tr><td></td><td></td></tr> </table> |                                                                                     |  |  |  |  |  |  |
|           |                                                                                  |                                                                                                                                                                    |                                                                                     |  |  |  |  |  |  |
|           |                                                                                  |                                                                                                                                                                    |                                                                                     |  |  |  |  |  |  |
|           |                                                                                  |                                                                                                                                                                    |                                                                                     |  |  |  |  |  |  |

**Please place an "X" next to the following statement to indicate your agreement:**

☒ I certify that I have answered every question and have not altered the wording of any of the questions on this form.



## ICMJE DISCLOSURE FORM

**Date:** 1/13/2022

**Your Name:** Clemens M. Schirmer, MD, PhD, MBA

**Manuscript Title:** Prospective Study on Embolization of Intracranial Aneurysms with the Pipeline Device (PREMIER study): 3-year results with the application of a flow diverter-specific occlusion classification

**Manuscript Number (if known):** neurintsurg-2021-018501

In the interest of transparency, we ask you to disclose all relationships/activities/interests listed below that are related to the content of your manuscript. "Related" means any relation with for-profit or not-for-profit third parties whose interests may be affected by the content of the manuscript. Disclosure represents a commitment to transparency and does not necessarily indicate a bias. If you are in doubt about whether to list a relationship/activity/interest, it is preferable that you do so.

The author's relationships/activities/interests should be defined broadly. For example, if your manuscript pertains to the epidemiology of hypertension, you should declare all relationships with manufacturers of antihypertensive medication, even if that medication is not mentioned in the manuscript.

In item #1 below, report all support for the work reported in this manuscript without time limit. For all other items, the time frame for disclosure is the past 36 months.

|                                                           | Name all entities with whom you have this relationship or indicate none (add rows as needed)                                                                                   | Specifications/Comments (e.g., if payments were made to you or to your institution)                                                                                                                         |                               |  |  |  |  |                                           |
|-----------------------------------------------------------|--------------------------------------------------------------------------------------------------------------------------------------------------------------------------------|-------------------------------------------------------------------------------------------------------------------------------------------------------------------------------------------------------------|-------------------------------|--|--|--|--|-------------------------------------------|
| <b>Time frame: Since the initial planning of the work</b> |                                                                                                                                                                                |                                                                                                                                                                                                             |                               |  |  |  |  |                                           |
| <b>1</b>                                                  | All support for the present manuscript (e.g., funding, provision of study materials, medical writing, article processing charges, etc.)<br><b>No time limit for this item.</b> | <input checked="" type="checkbox"/> <b>None</b><br><table border="1"> <tr><td></td><td></td></tr> <tr><td></td><td></td></tr> <tr><td></td><td>Click the tab key to add additional rows.</td></tr> </table> |                               |  |  |  |  | Click the tab key to add additional rows. |
|                                                           |                                                                                                                                                                                |                                                                                                                                                                                                             |                               |  |  |  |  |                                           |
|                                                           |                                                                                                                                                                                |                                                                                                                                                                                                             |                               |  |  |  |  |                                           |
|                                                           | Click the tab key to add additional rows.                                                                                                                                      |                                                                                                                                                                                                             |                               |  |  |  |  |                                           |
| <b>Time frame: past 36 months</b>                         |                                                                                                                                                                                |                                                                                                                                                                                                             |                               |  |  |  |  |                                           |
| <b>2</b>                                                  | Grants or contracts from any entity (if not indicated in item #1 above).                                                                                                       | <input type="checkbox"/> <b>None</b><br><table border="1"> <tr><td>Penunmbra (paid to Geisinger)</td><td></td></tr> <tr><td></td><td></td></tr> <tr><td></td><td></td></tr> </table>                        | Penunmbra (paid to Geisinger) |  |  |  |  |                                           |
| Penunmbra (paid to Geisinger)                             |                                                                                                                                                                                |                                                                                                                                                                                                             |                               |  |  |  |  |                                           |
|                                                           |                                                                                                                                                                                |                                                                                                                                                                                                             |                               |  |  |  |  |                                           |
|                                                           |                                                                                                                                                                                |                                                                                                                                                                                                             |                               |  |  |  |  |                                           |
| <b>3</b>                                                  | Royalties or licenses                                                                                                                                                          | <input checked="" type="checkbox"/> <b>None</b><br><table border="1"> <tr><td></td><td></td></tr> <tr><td></td><td></td></tr> <tr><td></td><td></td></tr> </table>                                          |                               |  |  |  |  |                                           |
|                                                           |                                                                                                                                                                                |                                                                                                                                                                                                             |                               |  |  |  |  |                                           |
|                                                           |                                                                                                                                                                                |                                                                                                                                                                                                             |                               |  |  |  |  |                                           |
|                                                           |                                                                                                                                                                                |                                                                                                                                                                                                             |                               |  |  |  |  |                                           |

|                                               |                                                                                                              | Name all entities with whom you have this relationship or indicate none (add rows as needed)                                                                                                         | Specifications/Comments (e.g., if payments were made to you or to your institution) |  |  |  |  |  |  |  |  |
|-----------------------------------------------|--------------------------------------------------------------------------------------------------------------|------------------------------------------------------------------------------------------------------------------------------------------------------------------------------------------------------|-------------------------------------------------------------------------------------|--|--|--|--|--|--|--|--|
| 4                                             | Consulting fees                                                                                              | <input checked="" type="checkbox"/> <b>None</b><br><table border="1"> <tr><td></td><td></td></tr> <tr><td></td><td></td></tr> <tr><td></td><td></td></tr> <tr><td></td><td></td></tr> </table>       |                                                                                     |  |  |  |  |  |  |  |  |
|                                               |                                                                                                              |                                                                                                                                                                                                      |                                                                                     |  |  |  |  |  |  |  |  |
|                                               |                                                                                                              |                                                                                                                                                                                                      |                                                                                     |  |  |  |  |  |  |  |  |
|                                               |                                                                                                              |                                                                                                                                                                                                      |                                                                                     |  |  |  |  |  |  |  |  |
|                                               |                                                                                                              |                                                                                                                                                                                                      |                                                                                     |  |  |  |  |  |  |  |  |
| 5                                             | Payment or honoraria for lectures, presentations, speakers bureaus, manuscript writing or educational events | <input checked="" type="checkbox"/> <b>None</b><br><table border="1"> <tr><td></td><td></td></tr> <tr><td></td><td></td></tr> <tr><td></td><td></td></tr> </table>                                   |                                                                                     |  |  |  |  |  |  |  |  |
|                                               |                                                                                                              |                                                                                                                                                                                                      |                                                                                     |  |  |  |  |  |  |  |  |
|                                               |                                                                                                              |                                                                                                                                                                                                      |                                                                                     |  |  |  |  |  |  |  |  |
|                                               |                                                                                                              |                                                                                                                                                                                                      |                                                                                     |  |  |  |  |  |  |  |  |
| 6                                             | Payment for expert testimony                                                                                 | <input checked="" type="checkbox"/> <b>None</b><br><table border="1"> <tr><td></td><td></td></tr> <tr><td></td><td></td></tr> <tr><td></td><td></td></tr> </table>                                   |                                                                                     |  |  |  |  |  |  |  |  |
|                                               |                                                                                                              |                                                                                                                                                                                                      |                                                                                     |  |  |  |  |  |  |  |  |
|                                               |                                                                                                              |                                                                                                                                                                                                      |                                                                                     |  |  |  |  |  |  |  |  |
|                                               |                                                                                                              |                                                                                                                                                                                                      |                                                                                     |  |  |  |  |  |  |  |  |
| 7                                             | Support for attending meetings and/or travel                                                                 | <input checked="" type="checkbox"/> <b>None</b><br><table border="1"> <tr><td></td><td></td></tr> <tr><td></td><td></td></tr> <tr><td></td><td></td></tr> </table>                                   |                                                                                     |  |  |  |  |  |  |  |  |
|                                               |                                                                                                              |                                                                                                                                                                                                      |                                                                                     |  |  |  |  |  |  |  |  |
|                                               |                                                                                                              |                                                                                                                                                                                                      |                                                                                     |  |  |  |  |  |  |  |  |
|                                               |                                                                                                              |                                                                                                                                                                                                      |                                                                                     |  |  |  |  |  |  |  |  |
| 8                                             | Patents planned, issued or pending                                                                           | <input checked="" type="checkbox"/> <b>None</b><br><table border="1"> <tr><td></td><td></td></tr> <tr><td></td><td></td></tr> <tr><td></td><td></td></tr> </table>                                   |                                                                                     |  |  |  |  |  |  |  |  |
|                                               |                                                                                                              |                                                                                                                                                                                                      |                                                                                     |  |  |  |  |  |  |  |  |
|                                               |                                                                                                              |                                                                                                                                                                                                      |                                                                                     |  |  |  |  |  |  |  |  |
|                                               |                                                                                                              |                                                                                                                                                                                                      |                                                                                     |  |  |  |  |  |  |  |  |
| 9                                             | Participation on a Data Safety Monitoring Board or Advisory Board                                            | <input type="checkbox"/> <b>None</b><br><table border="1"> <tr><td>ELEVATE</td><td></td></tr> <tr><td></td><td></td></tr> <tr><td></td><td></td></tr> </table>                                       | ELEVATE                                                                             |  |  |  |  |  |  |  |  |
| ELEVATE                                       |                                                                                                              |                                                                                                                                                                                                      |                                                                                     |  |  |  |  |  |  |  |  |
|                                               |                                                                                                              |                                                                                                                                                                                                      |                                                                                     |  |  |  |  |  |  |  |  |
|                                               |                                                                                                              |                                                                                                                                                                                                      |                                                                                     |  |  |  |  |  |  |  |  |
| 10                                            | Leadership or fiduciary role in other board, society, committee or advocacy group, paid or unpaid            | <input type="checkbox"/> <b>None</b><br><table border="1"> <tr><td>Chair, Joint AANS/CNS Cerebrovascular Section</td><td></td></tr> <tr><td></td><td></td></tr> <tr><td></td><td></td></tr> </table> | Chair, Joint AANS/CNS Cerebrovascular Section                                       |  |  |  |  |  |  |  |  |
| Chair, Joint AANS/CNS Cerebrovascular Section |                                                                                                              |                                                                                                                                                                                                      |                                                                                     |  |  |  |  |  |  |  |  |
|                                               |                                                                                                              |                                                                                                                                                                                                      |                                                                                     |  |  |  |  |  |  |  |  |
|                                               |                                                                                                              |                                                                                                                                                                                                      |                                                                                     |  |  |  |  |  |  |  |  |

|           |                                                                                  | Name all entities with whom you have this relationship or indicate none (add rows as needed) | Specifications/Comments (e.g., if payments were made to you or to your institution) |
|-----------|----------------------------------------------------------------------------------|----------------------------------------------------------------------------------------------|-------------------------------------------------------------------------------------|
| <b>11</b> | Stock or stock options                                                           | <input type="checkbox"/> <b>None</b>                                                         |                                                                                     |
|           |                                                                                  | NTI                                                                                          |                                                                                     |
|           |                                                                                  |                                                                                              |                                                                                     |
|           |                                                                                  |                                                                                              |                                                                                     |
| <b>12</b> | Receipt of equipment, materials, drugs, medical writing, gifts or other services | <input checked="" type="checkbox"/> <b>None</b>                                              |                                                                                     |
|           |                                                                                  |                                                                                              |                                                                                     |
|           |                                                                                  |                                                                                              |                                                                                     |
|           |                                                                                  |                                                                                              |                                                                                     |
| <b>13</b> | Other financial or non-financial interests                                       | <input checked="" type="checkbox"/> <b>None</b>                                              |                                                                                     |
|           |                                                                                  |                                                                                              |                                                                                     |
|           |                                                                                  |                                                                                              |                                                                                     |
|           |                                                                                  |                                                                                              |                                                                                     |

**Please place an "X" next to the following statement to indicate your agreement:**

☒ I certify that I have answered every question and have not altered the wording of any of the questions on this form.

ICMJE DISCLOSURE FORM

Date:

1/16/2022

Your Name:

Curtis A. Given II, MD

Manuscript Title:

Prospective Study on Embolization of Intracranial Aneurysms with the Pipeline Device (PREMIER study): 3-year results with the application of a flow diverter-specific occlusion classification

Manuscript Number (if known):

neurintsurg-2021-018501

In the interest of transparency, we ask you to disclose all relationships/activities/interests listed below that are related to the content of your manuscript. “Related” means any relation with for-profit or not-for-profit third parties whose interests may be affected by the content of the manuscript. Disclosure represents a commitment to transparency and does not necessarily indicate a bias. If you are in doubt about whether to list a relationship/activity/interest, it is preferable that you do so.

The author’s relationships/activities/interests should be defined broadly. For example, if your manuscript pertains to the epidemiology of hypertension, you should declare all relationships with manufacturers of antihypertensive medication, even if that medication is not mentioned in the manuscript.

In item #1 below, report all support for the work reported in this manuscript without time limit. For all other items, the time frame for disclosure is the past 36 months.

|                                                    | Name all entities with whom you have this relationship or indicate none (add rows as needed)                                                                                                                                                                                                                                                                                      | Specifications/Comments (e.g., if payments were made to you or to your institution) |  |  |  |  |                                           |  |
|----------------------------------------------------|-----------------------------------------------------------------------------------------------------------------------------------------------------------------------------------------------------------------------------------------------------------------------------------------------------------------------------------------------------------------------------------|-------------------------------------------------------------------------------------|--|--|--|--|-------------------------------------------|--|
| Time frame: Since the initial planning of the work |                                                                                                                                                                                                                                                                                                                                                                                   |                                                                                     |  |  |  |  |                                           |  |
| 1                                                  | <div>All support for the present manuscript (e.g., funding, provision of study materials, medical writing, article processing charges, etc.)<br/>No time limit for this item.</div> <div><input checked="" type="checkbox"/> None</div> <table><tr><td></td><td></td></tr><tr><td></td><td></td></tr><tr><td></td><td>Click the tab key to add additional rows.</td></tr></table> |                                                                                     |  |  |  |  | Click the tab key to add additional rows. |  |
|                                                    |                                                                                                                                                                                                                                                                                                                                                                                   |                                                                                     |  |  |  |  |                                           |  |
|                                                    |                                                                                                                                                                                                                                                                                                                                                                                   |                                                                                     |  |  |  |  |                                           |  |
|                                                    | Click the tab key to add additional rows.                                                                                                                                                                                                                                                                                                                                         |                                                                                     |  |  |  |  |                                           |  |
| Time frame: past 36 months                         |                                                                                                                                                                                                                                                                                                                                                                                   |                                                                                     |  |  |  |  |                                           |  |
| 2                                                  | <div>Grants or contracts from any entity (if not indicated in item #1 above).</div> <div><input checked="" type="checkbox"/> None</div> <table><tr><td></td><td></td></tr><tr><td></td><td></td></tr><tr><td></td><td></td></tr></table>                                                                                                                                          |                                                                                     |  |  |  |  |                                           |  |
|                                                    |                                                                                                                                                                                                                                                                                                                                                                                   |                                                                                     |  |  |  |  |                                           |  |
|                                                    |                                                                                                                                                                                                                                                                                                                                                                                   |                                                                                     |  |  |  |  |                                           |  |
|                                                    |                                                                                                                                                                                                                                                                                                                                                                                   |                                                                                     |  |  |  |  |                                           |  |
| 3                                                  | <div>Royalties or licenses</div> <div><input checked="" type="checkbox"/> None</div> <table><tr><td></td><td></td></tr><tr><td></td><td></td></tr><tr><td></td><td></td></tr></table>                                                                                                                                                                                             |                                                                                     |  |  |  |  |                                           |  |
|                                                    |                                                                                                                                                                                                                                                                                                                                                                                   |                                                                                     |  |  |  |  |                                           |  |
|                                                    |                                                                                                                                                                                                                                                                                                                                                                                   |                                                                                     |  |  |  |  |                                           |  |
|                                                    |                                                                                                                                                                                                                                                                                                                                                                                   |                                                                                     |  |  |  |  |                                           |  |

|           |                                                                                                              | Name all entities with whom you have this relationship or indicate none (add rows as needed)                                                                                                                                               | Specifications/Comments (e.g., if payments were made to you or to your institution) |                   |           |                   |  |  |  |  |  |
|-----------|--------------------------------------------------------------------------------------------------------------|--------------------------------------------------------------------------------------------------------------------------------------------------------------------------------------------------------------------------------------------|-------------------------------------------------------------------------------------|-------------------|-----------|-------------------|--|--|--|--|--|
| 4         | Consulting fees                                                                                              | <input type="checkbox"/> None<br><table border="1"> <tr> <td>Stryker</td> <td>Physician Proctor</td> </tr> <tr> <td>Medtronic</td> <td>Physician Proctor</td> </tr> <tr> <td></td> <td></td> </tr> <tr> <td></td> <td></td> </tr> </table> | Stryker                                                                             | Physician Proctor | Medtronic | Physician Proctor |  |  |  |  |  |
| Stryker   | Physician Proctor                                                                                            |                                                                                                                                                                                                                                            |                                                                                     |                   |           |                   |  |  |  |  |  |
| Medtronic | Physician Proctor                                                                                            |                                                                                                                                                                                                                                            |                                                                                     |                   |           |                   |  |  |  |  |  |
|           |                                                                                                              |                                                                                                                                                                                                                                            |                                                                                     |                   |           |                   |  |  |  |  |  |
|           |                                                                                                              |                                                                                                                                                                                                                                            |                                                                                     |                   |           |                   |  |  |  |  |  |
| 5         | Payment or honoraria for lectures, presentations, speakers bureaus, manuscript writing or educational events | <input type="checkbox"/> None<br><table border="1"> <tr> <td>Stryker</td> <td>Speakers Bureau</td> </tr> <tr> <td>Medtronic</td> <td>Speakers Bureau</td> </tr> <tr> <td></td> <td></td> </tr> </table>                                    | Stryker                                                                             | Speakers Bureau   | Medtronic | Speakers Bureau   |  |  |  |  |  |
| Stryker   | Speakers Bureau                                                                                              |                                                                                                                                                                                                                                            |                                                                                     |                   |           |                   |  |  |  |  |  |
| Medtronic | Speakers Bureau                                                                                              |                                                                                                                                                                                                                                            |                                                                                     |                   |           |                   |  |  |  |  |  |
|           |                                                                                                              |                                                                                                                                                                                                                                            |                                                                                     |                   |           |                   |  |  |  |  |  |
| 6         | Payment for expert testimony                                                                                 | <input checked="" type="checkbox"/> None<br><table border="1"> <tr> <td></td> <td></td> </tr> <tr> <td></td> <td></td> </tr> <tr> <td></td> <td></td> </tr> </table>                                                                       |                                                                                     |                   |           |                   |  |  |  |  |  |
|           |                                                                                                              |                                                                                                                                                                                                                                            |                                                                                     |                   |           |                   |  |  |  |  |  |
|           |                                                                                                              |                                                                                                                                                                                                                                            |                                                                                     |                   |           |                   |  |  |  |  |  |
|           |                                                                                                              |                                                                                                                                                                                                                                            |                                                                                     |                   |           |                   |  |  |  |  |  |
| 7         | Support for attending meetings and/or travel                                                                 | <input checked="" type="checkbox"/> None<br><table border="1"> <tr> <td></td> <td></td> </tr> <tr> <td></td> <td></td> </tr> <tr> <td></td> <td></td> </tr> </table>                                                                       |                                                                                     |                   |           |                   |  |  |  |  |  |
|           |                                                                                                              |                                                                                                                                                                                                                                            |                                                                                     |                   |           |                   |  |  |  |  |  |
|           |                                                                                                              |                                                                                                                                                                                                                                            |                                                                                     |                   |           |                   |  |  |  |  |  |
|           |                                                                                                              |                                                                                                                                                                                                                                            |                                                                                     |                   |           |                   |  |  |  |  |  |
| 8         | Patents planned, issued or pending                                                                           | <input checked="" type="checkbox"/> None<br><table border="1"> <tr> <td></td> <td></td> </tr> <tr> <td></td> <td></td> </tr> <tr> <td></td> <td></td> </tr> </table>                                                                       |                                                                                     |                   |           |                   |  |  |  |  |  |
|           |                                                                                                              |                                                                                                                                                                                                                                            |                                                                                     |                   |           |                   |  |  |  |  |  |
|           |                                                                                                              |                                                                                                                                                                                                                                            |                                                                                     |                   |           |                   |  |  |  |  |  |
|           |                                                                                                              |                                                                                                                                                                                                                                            |                                                                                     |                   |           |                   |  |  |  |  |  |
| 9         | Participation on a Data Safety Monitoring Board or Advisory Board                                            | <input checked="" type="checkbox"/> None<br><table border="1"> <tr> <td></td> <td></td> </tr> <tr> <td></td> <td></td> </tr> <tr> <td></td> <td></td> </tr> </table>                                                                       |                                                                                     |                   |           |                   |  |  |  |  |  |
|           |                                                                                                              |                                                                                                                                                                                                                                            |                                                                                     |                   |           |                   |  |  |  |  |  |
|           |                                                                                                              |                                                                                                                                                                                                                                            |                                                                                     |                   |           |                   |  |  |  |  |  |
|           |                                                                                                              |                                                                                                                                                                                                                                            |                                                                                     |                   |           |                   |  |  |  |  |  |
| 10        | Leadership or fiduciary role in other board, society, committee or advocacy group, paid or unpaid            | <input checked="" type="checkbox"/> None<br><table border="1"> <tr> <td></td> <td></td> </tr> <tr> <td></td> <td></td> </tr> <tr> <td></td> <td></td> </tr> </table>                                                                       |                                                                                     |                   |           |                   |  |  |  |  |  |
|           |                                                                                                              |                                                                                                                                                                                                                                            |                                                                                     |                   |           |                   |  |  |  |  |  |
|           |                                                                                                              |                                                                                                                                                                                                                                            |                                                                                     |                   |           |                   |  |  |  |  |  |
|           |                                                                                                              |                                                                                                                                                                                                                                            |                                                                                     |                   |           |                   |  |  |  |  |  |

|           |                                                                                  | Name all entities with whom you have this relationship or indicate none (add rows as needed)                                                                       | Specifications/Comments (e.g., if payments were made to you or to your institution) |  |  |  |  |  |  |
|-----------|----------------------------------------------------------------------------------|--------------------------------------------------------------------------------------------------------------------------------------------------------------------|-------------------------------------------------------------------------------------|--|--|--|--|--|--|
| <b>11</b> | Stock or stock options                                                           | <input checked="" type="checkbox"/> <b>None</b><br><table border="1"> <tr><td></td><td></td></tr> <tr><td></td><td></td></tr> <tr><td></td><td></td></tr> </table> |                                                                                     |  |  |  |  |  |  |
|           |                                                                                  |                                                                                                                                                                    |                                                                                     |  |  |  |  |  |  |
|           |                                                                                  |                                                                                                                                                                    |                                                                                     |  |  |  |  |  |  |
|           |                                                                                  |                                                                                                                                                                    |                                                                                     |  |  |  |  |  |  |
| <b>12</b> | Receipt of equipment, materials, drugs, medical writing, gifts or other services | <input checked="" type="checkbox"/> <b>None</b><br><table border="1"> <tr><td></td><td></td></tr> <tr><td></td><td></td></tr> <tr><td></td><td></td></tr> </table> |                                                                                     |  |  |  |  |  |  |
|           |                                                                                  |                                                                                                                                                                    |                                                                                     |  |  |  |  |  |  |
|           |                                                                                  |                                                                                                                                                                    |                                                                                     |  |  |  |  |  |  |
|           |                                                                                  |                                                                                                                                                                    |                                                                                     |  |  |  |  |  |  |
| <b>13</b> | Other financial or non-financial interests                                       | <input checked="" type="checkbox"/> <b>None</b><br><table border="1"> <tr><td></td><td></td></tr> <tr><td></td><td></td></tr> <tr><td></td><td></td></tr> </table> |                                                                                     |  |  |  |  |  |  |
|           |                                                                                  |                                                                                                                                                                    |                                                                                     |  |  |  |  |  |  |
|           |                                                                                  |                                                                                                                                                                    |                                                                                     |  |  |  |  |  |  |
|           |                                                                                  |                                                                                                                                                                    |                                                                                     |  |  |  |  |  |  |

**Please place an "X" next to the following statement to indicate your agreement:**

☒ I certify that I have answered every question and have not altered the wording of any of the questions on this form.

## ICMJE DISCLOSURE FORM

**Date:** 1/13/2022

**Your Name:** David Fiorella

**Manuscript Title:** Prospective Study on Embolization of Intracranial Aneurysms with the Pipeline Device (PREMIER study): 3-year results with the application of a flow diverter-specific occlusion classification

**Manuscript Number (if known):** neurintsurg-2021-018501

In the interest of transparency, we ask you to disclose all relationships/activities/interests listed below that are related to the content of your manuscript. "Related" means any relation with for-profit or not-for-profit third parties whose interests may be affected by the content of the manuscript. Disclosure represents a commitment to transparency and does not necessarily indicate a bias. If you are in doubt about whether to list a relationship/activity/interest, it is preferable that you do so.

The author's relationships/activities/interests should be defined broadly. For example, if your manuscript pertains to the epidemiology of hypertension, you should declare all relationships with manufacturers of antihypertensive medication, even if that medication is not mentioned in the manuscript.

In item #1 below, report all support for the work reported in this manuscript without time limit. For all other items, the time frame for disclosure is the past 36 months.

|                                                           | Name all entities with whom you have this relationship or indicate none (add rows as needed)                                                                                   | Specifications/Comments (e.g., if payments were made to you or to your institution)                                                                                                                         |  |  |  |  |  |                                           |
|-----------------------------------------------------------|--------------------------------------------------------------------------------------------------------------------------------------------------------------------------------|-------------------------------------------------------------------------------------------------------------------------------------------------------------------------------------------------------------|--|--|--|--|--|-------------------------------------------|
| <b>Time frame: Since the initial planning of the work</b> |                                                                                                                                                                                |                                                                                                                                                                                                             |  |  |  |  |  |                                           |
| <b>1</b>                                                  | All support for the present manuscript (e.g., funding, provision of study materials, medical writing, article processing charges, etc.)<br><b>No time limit for this item.</b> | <input checked="" type="checkbox"/> <b>None</b><br><table border="1"> <tr><td></td><td></td></tr> <tr><td></td><td></td></tr> <tr><td></td><td>Click the tab key to add additional rows.</td></tr> </table> |  |  |  |  |  | Click the tab key to add additional rows. |
|                                                           |                                                                                                                                                                                |                                                                                                                                                                                                             |  |  |  |  |  |                                           |
|                                                           |                                                                                                                                                                                |                                                                                                                                                                                                             |  |  |  |  |  |                                           |
|                                                           | Click the tab key to add additional rows.                                                                                                                                      |                                                                                                                                                                                                             |  |  |  |  |  |                                           |
| <b>Time frame: past 36 months</b>                         |                                                                                                                                                                                |                                                                                                                                                                                                             |  |  |  |  |  |                                           |
| <b>2</b>                                                  | Grants or contracts from any entity (if not indicated in item #1 above).                                                                                                       | <input checked="" type="checkbox"/> <b>None</b><br><table border="1"> <tr><td></td><td></td></tr> <tr><td></td><td></td></tr> <tr><td></td><td></td></tr> </table>                                          |  |  |  |  |  |                                           |
|                                                           |                                                                                                                                                                                |                                                                                                                                                                                                             |  |  |  |  |  |                                           |
|                                                           |                                                                                                                                                                                |                                                                                                                                                                                                             |  |  |  |  |  |                                           |
|                                                           |                                                                                                                                                                                |                                                                                                                                                                                                             |  |  |  |  |  |                                           |
| <b>3</b>                                                  | Royalties or licenses                                                                                                                                                          | <input checked="" type="checkbox"/> <b>None</b><br><table border="1"> <tr><td></td><td></td></tr> <tr><td></td><td></td></tr> <tr><td></td><td></td></tr> </table>                                          |  |  |  |  |  |                                           |
|                                                           |                                                                                                                                                                                |                                                                                                                                                                                                             |  |  |  |  |  |                                           |
|                                                           |                                                                                                                                                                                |                                                                                                                                                                                                             |  |  |  |  |  |                                           |
|                                                           |                                                                                                                                                                                |                                                                                                                                                                                                             |  |  |  |  |  |                                           |

|                                                         |                                                                                                              | Name all entities with whom you have this relationship or indicate none (add rows as needed)                                                                                                                                                                                                                                                                                                                                                                                                                                                                                                                                                                                                                                                                                                                                                                                                                                                                                                                                       | Specifications/Comments (e.g., if payments were made to you or to your institution) |  |                         |  |                                                         |  |                             |  |                                        |  |                                         |  |                            |  |                                                         |  |                                      |  |                                       |  |                       |  |                            |  |                                        |  |                              |  |                             |  |  |
|---------------------------------------------------------|--------------------------------------------------------------------------------------------------------------|------------------------------------------------------------------------------------------------------------------------------------------------------------------------------------------------------------------------------------------------------------------------------------------------------------------------------------------------------------------------------------------------------------------------------------------------------------------------------------------------------------------------------------------------------------------------------------------------------------------------------------------------------------------------------------------------------------------------------------------------------------------------------------------------------------------------------------------------------------------------------------------------------------------------------------------------------------------------------------------------------------------------------------|-------------------------------------------------------------------------------------|--|-------------------------|--|---------------------------------------------------------|--|-----------------------------|--|----------------------------------------|--|-----------------------------------------|--|----------------------------|--|---------------------------------------------------------|--|--------------------------------------|--|---------------------------------------|--|-----------------------|--|----------------------------|--|----------------------------------------|--|------------------------------|--|-----------------------------|--|--|
| 4                                                       | Consulting fees                                                                                              | <input type="checkbox"/> <b>None</b> <table border="1"> <tr><td>Medtronic – Consulting, Proctoring</td><td></td></tr> <tr><td>Cerenovous – Consulting</td><td></td></tr> <tr><td>Microvention – Consulting, Proctoring, Research Support</td><td></td></tr> <tr><td>Penumbra – Research Support</td><td></td></tr> <tr><td>Stryker – Consulting, Research Support</td><td></td></tr> <tr><td>Balt USA – Consulting, Research Support</td><td></td></tr> <tr><td>Siemens – Research Support</td><td></td></tr> <tr><td>MENTICE-Vascular Simulations – Stock Holder, Consultant</td><td></td></tr> <tr><td>Neurogami – Stock Holder, Consultant</td><td></td></tr> <tr><td>Marblehead – Consultant, Stock Holder</td><td></td></tr> <tr><td>RAPID.AI – Consultant</td><td></td></tr> <tr><td>RAPID Medical – Consultant</td><td></td></tr> <tr><td>Qapel Medical – Honorarium, Consultant</td><td></td></tr> <tr><td>Arsenal Medical – Consultant</td><td></td></tr> <tr><td>Phenox Medical - Consultant</td><td></td></tr> </table> | Medtronic – Consulting, Proctoring                                                  |  | Cerenovous – Consulting |  | Microvention – Consulting, Proctoring, Research Support |  | Penumbra – Research Support |  | Stryker – Consulting, Research Support |  | Balt USA – Consulting, Research Support |  | Siemens – Research Support |  | MENTICE-Vascular Simulations – Stock Holder, Consultant |  | Neurogami – Stock Holder, Consultant |  | Marblehead – Consultant, Stock Holder |  | RAPID.AI – Consultant |  | RAPID Medical – Consultant |  | Qapel Medical – Honorarium, Consultant |  | Arsenal Medical – Consultant |  | Phenox Medical - Consultant |  |  |
| Medtronic – Consulting, Proctoring                      |                                                                                                              |                                                                                                                                                                                                                                                                                                                                                                                                                                                                                                                                                                                                                                                                                                                                                                                                                                                                                                                                                                                                                                    |                                                                                     |  |                         |  |                                                         |  |                             |  |                                        |  |                                         |  |                            |  |                                                         |  |                                      |  |                                       |  |                       |  |                            |  |                                        |  |                              |  |                             |  |  |
| Cerenovous – Consulting                                 |                                                                                                              |                                                                                                                                                                                                                                                                                                                                                                                                                                                                                                                                                                                                                                                                                                                                                                                                                                                                                                                                                                                                                                    |                                                                                     |  |                         |  |                                                         |  |                             |  |                                        |  |                                         |  |                            |  |                                                         |  |                                      |  |                                       |  |                       |  |                            |  |                                        |  |                              |  |                             |  |  |
| Microvention – Consulting, Proctoring, Research Support |                                                                                                              |                                                                                                                                                                                                                                                                                                                                                                                                                                                                                                                                                                                                                                                                                                                                                                                                                                                                                                                                                                                                                                    |                                                                                     |  |                         |  |                                                         |  |                             |  |                                        |  |                                         |  |                            |  |                                                         |  |                                      |  |                                       |  |                       |  |                            |  |                                        |  |                              |  |                             |  |  |
| Penumbra – Research Support                             |                                                                                                              |                                                                                                                                                                                                                                                                                                                                                                                                                                                                                                                                                                                                                                                                                                                                                                                                                                                                                                                                                                                                                                    |                                                                                     |  |                         |  |                                                         |  |                             |  |                                        |  |                                         |  |                            |  |                                                         |  |                                      |  |                                       |  |                       |  |                            |  |                                        |  |                              |  |                             |  |  |
| Stryker – Consulting, Research Support                  |                                                                                                              |                                                                                                                                                                                                                                                                                                                                                                                                                                                                                                                                                                                                                                                                                                                                                                                                                                                                                                                                                                                                                                    |                                                                                     |  |                         |  |                                                         |  |                             |  |                                        |  |                                         |  |                            |  |                                                         |  |                                      |  |                                       |  |                       |  |                            |  |                                        |  |                              |  |                             |  |  |
| Balt USA – Consulting, Research Support                 |                                                                                                              |                                                                                                                                                                                                                                                                                                                                                                                                                                                                                                                                                                                                                                                                                                                                                                                                                                                                                                                                                                                                                                    |                                                                                     |  |                         |  |                                                         |  |                             |  |                                        |  |                                         |  |                            |  |                                                         |  |                                      |  |                                       |  |                       |  |                            |  |                                        |  |                              |  |                             |  |  |
| Siemens – Research Support                              |                                                                                                              |                                                                                                                                                                                                                                                                                                                                                                                                                                                                                                                                                                                                                                                                                                                                                                                                                                                                                                                                                                                                                                    |                                                                                     |  |                         |  |                                                         |  |                             |  |                                        |  |                                         |  |                            |  |                                                         |  |                                      |  |                                       |  |                       |  |                            |  |                                        |  |                              |  |                             |  |  |
| MENTICE-Vascular Simulations – Stock Holder, Consultant |                                                                                                              |                                                                                                                                                                                                                                                                                                                                                                                                                                                                                                                                                                                                                                                                                                                                                                                                                                                                                                                                                                                                                                    |                                                                                     |  |                         |  |                                                         |  |                             |  |                                        |  |                                         |  |                            |  |                                                         |  |                                      |  |                                       |  |                       |  |                            |  |                                        |  |                              |  |                             |  |  |
| Neurogami – Stock Holder, Consultant                    |                                                                                                              |                                                                                                                                                                                                                                                                                                                                                                                                                                                                                                                                                                                                                                                                                                                                                                                                                                                                                                                                                                                                                                    |                                                                                     |  |                         |  |                                                         |  |                             |  |                                        |  |                                         |  |                            |  |                                                         |  |                                      |  |                                       |  |                       |  |                            |  |                                        |  |                              |  |                             |  |  |
| Marblehead – Consultant, Stock Holder                   |                                                                                                              |                                                                                                                                                                                                                                                                                                                                                                                                                                                                                                                                                                                                                                                                                                                                                                                                                                                                                                                                                                                                                                    |                                                                                     |  |                         |  |                                                         |  |                             |  |                                        |  |                                         |  |                            |  |                                                         |  |                                      |  |                                       |  |                       |  |                            |  |                                        |  |                              |  |                             |  |  |
| RAPID.AI – Consultant                                   |                                                                                                              |                                                                                                                                                                                                                                                                                                                                                                                                                                                                                                                                                                                                                                                                                                                                                                                                                                                                                                                                                                                                                                    |                                                                                     |  |                         |  |                                                         |  |                             |  |                                        |  |                                         |  |                            |  |                                                         |  |                                      |  |                                       |  |                       |  |                            |  |                                        |  |                              |  |                             |  |  |
| RAPID Medical – Consultant                              |                                                                                                              |                                                                                                                                                                                                                                                                                                                                                                                                                                                                                                                                                                                                                                                                                                                                                                                                                                                                                                                                                                                                                                    |                                                                                     |  |                         |  |                                                         |  |                             |  |                                        |  |                                         |  |                            |  |                                                         |  |                                      |  |                                       |  |                       |  |                            |  |                                        |  |                              |  |                             |  |  |
| Qapel Medical – Honorarium, Consultant                  |                                                                                                              |                                                                                                                                                                                                                                                                                                                                                                                                                                                                                                                                                                                                                                                                                                                                                                                                                                                                                                                                                                                                                                    |                                                                                     |  |                         |  |                                                         |  |                             |  |                                        |  |                                         |  |                            |  |                                                         |  |                                      |  |                                       |  |                       |  |                            |  |                                        |  |                              |  |                             |  |  |
| Arsenal Medical – Consultant                            |                                                                                                              |                                                                                                                                                                                                                                                                                                                                                                                                                                                                                                                                                                                                                                                                                                                                                                                                                                                                                                                                                                                                                                    |                                                                                     |  |                         |  |                                                         |  |                             |  |                                        |  |                                         |  |                            |  |                                                         |  |                                      |  |                                       |  |                       |  |                            |  |                                        |  |                              |  |                             |  |  |
| Phenox Medical - Consultant                             |                                                                                                              |                                                                                                                                                                                                                                                                                                                                                                                                                                                                                                                                                                                                                                                                                                                                                                                                                                                                                                                                                                                                                                    |                                                                                     |  |                         |  |                                                         |  |                             |  |                                        |  |                                         |  |                            |  |                                                         |  |                                      |  |                                       |  |                       |  |                            |  |                                        |  |                              |  |                             |  |  |
| 5                                                       | Payment or honoraria for lectures, presentations, speakers bureaus, manuscript writing or educational events | <input type="checkbox"/> <b>None</b> <table border="1"> <tr><td>Medtronic – Consulting, Proctoring</td><td></td></tr> <tr><td>Cerenovous – Consulting</td><td></td></tr> <tr><td>Microvention – Consulting, Proctoring, Research Support</td><td></td></tr> <tr><td>Penumbra – Research Support</td><td></td></tr> <tr><td>Stryker – Consulting, Research Support</td><td></td></tr> <tr><td>Balt USA – Consulting, Research Support</td><td></td></tr> <tr><td>Siemens – Research Support</td><td></td></tr> <tr><td>MENTICE-Vascular Simulations – Stock Holder, Consultant</td><td></td></tr> <tr><td>Neurogami – Stock Holder, Consultant</td><td></td></tr> <tr><td>Marblehead – Consultant, Stock Holder</td><td></td></tr> <tr><td>RAPID.AI – Consultant</td><td></td></tr> <tr><td>RAPID Medical – Consultant</td><td></td></tr> <tr><td>Qapel Medical – Honorarium, Consultant</td><td></td></tr> <tr><td>Arsenal Medical – Consultant</td><td></td></tr> <tr><td>Phenox Medical - Consultant</td><td></td></tr> </table> | Medtronic – Consulting, Proctoring                                                  |  | Cerenovous – Consulting |  | Microvention – Consulting, Proctoring, Research Support |  | Penumbra – Research Support |  | Stryker – Consulting, Research Support |  | Balt USA – Consulting, Research Support |  | Siemens – Research Support |  | MENTICE-Vascular Simulations – Stock Holder, Consultant |  | Neurogami – Stock Holder, Consultant |  | Marblehead – Consultant, Stock Holder |  | RAPID.AI – Consultant |  | RAPID Medical – Consultant |  | Qapel Medical – Honorarium, Consultant |  | Arsenal Medical – Consultant |  | Phenox Medical - Consultant |  |  |
| Medtronic – Consulting, Proctoring                      |                                                                                                              |                                                                                                                                                                                                                                                                                                                                                                                                                                                                                                                                                                                                                                                                                                                                                                                                                                                                                                                                                                                                                                    |                                                                                     |  |                         |  |                                                         |  |                             |  |                                        |  |                                         |  |                            |  |                                                         |  |                                      |  |                                       |  |                       |  |                            |  |                                        |  |                              |  |                             |  |  |
| Cerenovous – Consulting                                 |                                                                                                              |                                                                                                                                                                                                                                                                                                                                                                                                                                                                                                                                                                                                                                                                                                                                                                                                                                                                                                                                                                                                                                    |                                                                                     |  |                         |  |                                                         |  |                             |  |                                        |  |                                         |  |                            |  |                                                         |  |                                      |  |                                       |  |                       |  |                            |  |                                        |  |                              |  |                             |  |  |
| Microvention – Consulting, Proctoring, Research Support |                                                                                                              |                                                                                                                                                                                                                                                                                                                                                                                                                                                                                                                                                                                                                                                                                                                                                                                                                                                                                                                                                                                                                                    |                                                                                     |  |                         |  |                                                         |  |                             |  |                                        |  |                                         |  |                            |  |                                                         |  |                                      |  |                                       |  |                       |  |                            |  |                                        |  |                              |  |                             |  |  |
| Penumbra – Research Support                             |                                                                                                              |                                                                                                                                                                                                                                                                                                                                                                                                                                                                                                                                                                                                                                                                                                                                                                                                                                                                                                                                                                                                                                    |                                                                                     |  |                         |  |                                                         |  |                             |  |                                        |  |                                         |  |                            |  |                                                         |  |                                      |  |                                       |  |                       |  |                            |  |                                        |  |                              |  |                             |  |  |
| Stryker – Consulting, Research Support                  |                                                                                                              |                                                                                                                                                                                                                                                                                                                                                                                                                                                                                                                                                                                                                                                                                                                                                                                                                                                                                                                                                                                                                                    |                                                                                     |  |                         |  |                                                         |  |                             |  |                                        |  |                                         |  |                            |  |                                                         |  |                                      |  |                                       |  |                       |  |                            |  |                                        |  |                              |  |                             |  |  |
| Balt USA – Consulting, Research Support                 |                                                                                                              |                                                                                                                                                                                                                                                                                                                                                                                                                                                                                                                                                                                                                                                                                                                                                                                                                                                                                                                                                                                                                                    |                                                                                     |  |                         |  |                                                         |  |                             |  |                                        |  |                                         |  |                            |  |                                                         |  |                                      |  |                                       |  |                       |  |                            |  |                                        |  |                              |  |                             |  |  |
| Siemens – Research Support                              |                                                                                                              |                                                                                                                                                                                                                                                                                                                                                                                                                                                                                                                                                                                                                                                                                                                                                                                                                                                                                                                                                                                                                                    |                                                                                     |  |                         |  |                                                         |  |                             |  |                                        |  |                                         |  |                            |  |                                                         |  |                                      |  |                                       |  |                       |  |                            |  |                                        |  |                              |  |                             |  |  |
| MENTICE-Vascular Simulations – Stock Holder, Consultant |                                                                                                              |                                                                                                                                                                                                                                                                                                                                                                                                                                                                                                                                                                                                                                                                                                                                                                                                                                                                                                                                                                                                                                    |                                                                                     |  |                         |  |                                                         |  |                             |  |                                        |  |                                         |  |                            |  |                                                         |  |                                      |  |                                       |  |                       |  |                            |  |                                        |  |                              |  |                             |  |  |
| Neurogami – Stock Holder, Consultant                    |                                                                                                              |                                                                                                                                                                                                                                                                                                                                                                                                                                                                                                                                                                                                                                                                                                                                                                                                                                                                                                                                                                                                                                    |                                                                                     |  |                         |  |                                                         |  |                             |  |                                        |  |                                         |  |                            |  |                                                         |  |                                      |  |                                       |  |                       |  |                            |  |                                        |  |                              |  |                             |  |  |
| Marblehead – Consultant, Stock Holder                   |                                                                                                              |                                                                                                                                                                                                                                                                                                                                                                                                                                                                                                                                                                                                                                                                                                                                                                                                                                                                                                                                                                                                                                    |                                                                                     |  |                         |  |                                                         |  |                             |  |                                        |  |                                         |  |                            |  |                                                         |  |                                      |  |                                       |  |                       |  |                            |  |                                        |  |                              |  |                             |  |  |
| RAPID.AI – Consultant                                   |                                                                                                              |                                                                                                                                                                                                                                                                                                                                                                                                                                                                                                                                                                                                                                                                                                                                                                                                                                                                                                                                                                                                                                    |                                                                                     |  |                         |  |                                                         |  |                             |  |                                        |  |                                         |  |                            |  |                                                         |  |                                      |  |                                       |  |                       |  |                            |  |                                        |  |                              |  |                             |  |  |
| RAPID Medical – Consultant                              |                                                                                                              |                                                                                                                                                                                                                                                                                                                                                                                                                                                                                                                                                                                                                                                                                                                                                                                                                                                                                                                                                                                                                                    |                                                                                     |  |                         |  |                                                         |  |                             |  |                                        |  |                                         |  |                            |  |                                                         |  |                                      |  |                                       |  |                       |  |                            |  |                                        |  |                              |  |                             |  |  |
| Qapel Medical – Honorarium, Consultant                  |                                                                                                              |                                                                                                                                                                                                                                                                                                                                                                                                                                                                                                                                                                                                                                                                                                                                                                                                                                                                                                                                                                                                                                    |                                                                                     |  |                         |  |                                                         |  |                             |  |                                        |  |                                         |  |                            |  |                                                         |  |                                      |  |                                       |  |                       |  |                            |  |                                        |  |                              |  |                             |  |  |
| Arsenal Medical – Consultant                            |                                                                                                              |                                                                                                                                                                                                                                                                                                                                                                                                                                                                                                                                                                                                                                                                                                                                                                                                                                                                                                                                                                                                                                    |                                                                                     |  |                         |  |                                                         |  |                             |  |                                        |  |                                         |  |                            |  |                                                         |  |                                      |  |                                       |  |                       |  |                            |  |                                        |  |                              |  |                             |  |  |
| Phenox Medical - Consultant                             |                                                                                                              |                                                                                                                                                                                                                                                                                                                                                                                                                                                                                                                                                                                                                                                                                                                                                                                                                                                                                                                                                                                                                                    |                                                                                     |  |                         |  |                                                         |  |                             |  |                                        |  |                                         |  |                            |  |                                                         |  |                                      |  |                                       |  |                       |  |                            |  |                                        |  |                              |  |                             |  |  |
| 6                                                       | Payment for expert testimony                                                                                 | <input checked="" type="checkbox"/> <b>None</b> <table border="1"> <tr><td></td><td></td></tr> <tr><td></td><td></td></tr> <tr><td></td><td></td></tr> </table>                                                                                                                                                                                                                                                                                                                                                                                                                                                                                                                                                                                                                                                                                                                                                                                                                                                                    |                                                                                     |  |                         |  |                                                         |  |                             |  |                                        |  |                                         |  |                            |  |                                                         |  |                                      |  |                                       |  |                       |  |                            |  |                                        |  |                              |  |                             |  |  |
|                                                         |                                                                                                              |                                                                                                                                                                                                                                                                                                                                                                                                                                                                                                                                                                                                                                                                                                                                                                                                                                                                                                                                                                                                                                    |                                                                                     |  |                         |  |                                                         |  |                             |  |                                        |  |                                         |  |                            |  |                                                         |  |                                      |  |                                       |  |                       |  |                            |  |                                        |  |                              |  |                             |  |  |
|                                                         |                                                                                                              |                                                                                                                                                                                                                                                                                                                                                                                                                                                                                                                                                                                                                                                                                                                                                                                                                                                                                                                                                                                                                                    |                                                                                     |  |                         |  |                                                         |  |                             |  |                                        |  |                                         |  |                            |  |                                                         |  |                                      |  |                                       |  |                       |  |                            |  |                                        |  |                              |  |                             |  |  |
|                                                         |                                                                                                              |                                                                                                                                                                                                                                                                                                                                                                                                                                                                                                                                                                                                                                                                                                                                                                                                                                                                                                                                                                                                                                    |                                                                                     |  |                         |  |                                                         |  |                             |  |                                        |  |                                         |  |                            |  |                                                         |  |                                      |  |                                       |  |                       |  |                            |  |                                        |  |                              |  |                             |  |  |
| 7                                                       | Support for attending meetings and/or travel                                                                 | <input checked="" type="checkbox"/> <b>None</b> <table border="1"> <tr><td></td><td></td></tr> <tr><td></td><td></td></tr> <tr><td></td><td></td></tr> </table>                                                                                                                                                                                                                                                                                                                                                                                                                                                                                                                                                                                                                                                                                                                                                                                                                                                                    |                                                                                     |  |                         |  |                                                         |  |                             |  |                                        |  |                                         |  |                            |  |                                                         |  |                                      |  |                                       |  |                       |  |                            |  |                                        |  |                              |  |                             |  |  |
|                                                         |                                                                                                              |                                                                                                                                                                                                                                                                                                                                                                                                                                                                                                                                                                                                                                                                                                                                                                                                                                                                                                                                                                                                                                    |                                                                                     |  |                         |  |                                                         |  |                             |  |                                        |  |                                         |  |                            |  |                                                         |  |                                      |  |                                       |  |                       |  |                            |  |                                        |  |                              |  |                             |  |  |
|                                                         |                                                                                                              |                                                                                                                                                                                                                                                                                                                                                                                                                                                                                                                                                                                                                                                                                                                                                                                                                                                                                                                                                                                                                                    |                                                                                     |  |                         |  |                                                         |  |                             |  |                                        |  |                                         |  |                            |  |                                                         |  |                                      |  |                                       |  |                       |  |                            |  |                                        |  |                              |  |                             |  |  |
|                                                         |                                                                                                              |                                                                                                                                                                                                                                                                                                                                                                                                                                                                                                                                                                                                                                                                                                                                                                                                                                                                                                                                                                                                                                    |                                                                                     |  |                         |  |                                                         |  |                             |  |                                        |  |                                         |  |                            |  |                                                         |  |                                      |  |                                       |  |                       |  |                            |  |                                        |  |                              |  |                             |  |  |



|                                                                                                                                                                                                                                                               |                                                                                                   | Name all entities with whom you have this relationship or indicate none (add rows as needed)                                                                                                                                   | Specifications/Comments (e.g., if payments were made to you or to your institution) |                                               |                 |          |  |  |  |
|---------------------------------------------------------------------------------------------------------------------------------------------------------------------------------------------------------------------------------------------------------------|---------------------------------------------------------------------------------------------------|--------------------------------------------------------------------------------------------------------------------------------------------------------------------------------------------------------------------------------|-------------------------------------------------------------------------------------|-----------------------------------------------|-----------------|----------|--|--|--|
| <b>8</b>                                                                                                                                                                                                                                                      | Patents planned, issued or pending                                                                | <input checked="" type="checkbox"/> <b>None</b><br><table border="1"> <tr><td></td><td></td></tr> <tr><td></td><td></td></tr> <tr><td></td><td></td></tr> </table>                                                             |                                                                                     |                                               |                 |          |  |  |  |
|                                                                                                                                                                                                                                                               |                                                                                                   |                                                                                                                                                                                                                                |                                                                                     |                                               |                 |          |  |  |  |
|                                                                                                                                                                                                                                                               |                                                                                                   |                                                                                                                                                                                                                                |                                                                                     |                                               |                 |          |  |  |  |
|                                                                                                                                                                                                                                                               |                                                                                                   |                                                                                                                                                                                                                                |                                                                                     |                                               |                 |          |  |  |  |
| <b>9</b>                                                                                                                                                                                                                                                      | Participation on a Data Safety Monitoring Board or Advisory Board                                 | <input type="checkbox"/> <b>None</b><br><table border="1"> <tr><td>MENTICE</td><td></td></tr> <tr><td>Scientia</td><td></td></tr> <tr><td></td><td></td></tr> </table>                                                         |                                                                                     | MENTICE                                       |                 | Scientia |  |  |  |
| MENTICE                                                                                                                                                                                                                                                       |                                                                                                   |                                                                                                                                                                                                                                |                                                                                     |                                               |                 |          |  |  |  |
| Scientia                                                                                                                                                                                                                                                      |                                                                                                   |                                                                                                                                                                                                                                |                                                                                     |                                               |                 |          |  |  |  |
|                                                                                                                                                                                                                                                               |                                                                                                   |                                                                                                                                                                                                                                |                                                                                     |                                               |                 |          |  |  |  |
| <b>10</b>                                                                                                                                                                                                                                                     | Leadership or fiduciary role in other board, society, committee or advocacy group, paid or unpaid | <input checked="" type="checkbox"/> <b>None</b><br><table border="1"> <tr><td>Journal of Neurointerventional Surgery (JNIS)</td><td>Editorial board</td></tr> <tr><td></td><td></td></tr> <tr><td></td><td></td></tr> </table> |                                                                                     | Journal of Neurointerventional Surgery (JNIS) | Editorial board |          |  |  |  |
| Journal of Neurointerventional Surgery (JNIS)                                                                                                                                                                                                                 | Editorial board                                                                                   |                                                                                                                                                                                                                                |                                                                                     |                                               |                 |          |  |  |  |
|                                                                                                                                                                                                                                                               |                                                                                                   |                                                                                                                                                                                                                                |                                                                                     |                                               |                 |          |  |  |  |
|                                                                                                                                                                                                                                                               |                                                                                                   |                                                                                                                                                                                                                                |                                                                                     |                                               |                 |          |  |  |  |
| <b>11</b>                                                                                                                                                                                                                                                     | Stock or stock options                                                                            | <input type="checkbox"/> <b>None</b><br><table border="1"> <tr><td>Scientia</td><td></td></tr> <tr><td></td><td></td></tr> <tr><td></td><td></td></tr> </table>                                                                |                                                                                     | Scientia                                      |                 |          |  |  |  |
| Scientia                                                                                                                                                                                                                                                      |                                                                                                   |                                                                                                                                                                                                                                |                                                                                     |                                               |                 |          |  |  |  |
|                                                                                                                                                                                                                                                               |                                                                                                   |                                                                                                                                                                                                                                |                                                                                     |                                               |                 |          |  |  |  |
|                                                                                                                                                                                                                                                               |                                                                                                   |                                                                                                                                                                                                                                |                                                                                     |                                               |                 |          |  |  |  |
| <b>12</b>                                                                                                                                                                                                                                                     | Receipt of equipment, materials, drugs, medical writing, gifts or other services                  | <input checked="" type="checkbox"/> <b>None</b><br><table border="1"> <tr><td></td><td></td></tr> <tr><td></td><td></td></tr> <tr><td></td><td></td></tr> </table>                                                             |                                                                                     |                                               |                 |          |  |  |  |
|                                                                                                                                                                                                                                                               |                                                                                                   |                                                                                                                                                                                                                                |                                                                                     |                                               |                 |          |  |  |  |
|                                                                                                                                                                                                                                                               |                                                                                                   |                                                                                                                                                                                                                                |                                                                                     |                                               |                 |          |  |  |  |
|                                                                                                                                                                                                                                                               |                                                                                                   |                                                                                                                                                                                                                                |                                                                                     |                                               |                 |          |  |  |  |
| <b>13</b>                                                                                                                                                                                                                                                     | Other financial or non-financial interests                                                        | <input checked="" type="checkbox"/> <b>None</b><br><table border="1"> <tr><td></td><td></td></tr> <tr><td></td><td></td></tr> <tr><td></td><td></td></tr> </table>                                                             |                                                                                     |                                               |                 |          |  |  |  |
|                                                                                                                                                                                                                                                               |                                                                                                   |                                                                                                                                                                                                                                |                                                                                     |                                               |                 |          |  |  |  |
|                                                                                                                                                                                                                                                               |                                                                                                   |                                                                                                                                                                                                                                |                                                                                     |                                               |                 |          |  |  |  |
|                                                                                                                                                                                                                                                               |                                                                                                   |                                                                                                                                                                                                                                |                                                                                     |                                               |                 |          |  |  |  |
| <p><b>Please place an "X" next to the following statement to indicate your agreement:</b></p> <p><input checked="" type="checkbox"/> I certify that I have answered every question and have not altered the wording of any of the questions on this form.</p> |                                                                                                   |                                                                                                                                                                                                                                |                                                                                     |                                               |                 |          |  |  |  |

## ICMJE DISCLOSURE FORM

**Date:** 1/13/2022

**Your Name:** David Kallmes

**Manuscript Title:** Prospective Study on Embolization of Intracranial Aneurysms with the Pipeline Device (PREMIER study): 3-year results with the application of a flow diverter-specific occlusion classification

**Manuscript Number (if known):** neurintsurg-2021-018501

In the interest of transparency, we ask you to disclose all relationships/activities/interests listed below that are related to the content of your manuscript. "Related" means any relation with for-profit or not-for-profit third parties whose interests may be affected by the content of the manuscript. Disclosure represents a commitment to transparency and does not necessarily indicate a bias. If you are in doubt about whether to list a relationship/activity/interest, it is preferable that you do so.

The author's relationships/activities/interests should be defined broadly. For example, if your manuscript pertains to the epidemiology of hypertension, you should declare all relationships with manufacturers of antihypertensive medication, even if that medication is not mentioned in the manuscript.

In item #1 below, report all support for the work reported in this manuscript without time limit. For all other items, the time frame for disclosure is the past 36 months.

|                                                           | Name all entities with whom you have this relationship or indicate none (add rows as needed)                                                                                   | Specifications/Comments (e.g., if payments were made to you or to your institution)                                                                                                                                                                                                                                                                                                 |              |                                      |      |                                           |                     |                                      |           |                                      |
|-----------------------------------------------------------|--------------------------------------------------------------------------------------------------------------------------------------------------------------------------------|-------------------------------------------------------------------------------------------------------------------------------------------------------------------------------------------------------------------------------------------------------------------------------------------------------------------------------------------------------------------------------------|--------------|--------------------------------------|------|-------------------------------------------|---------------------|--------------------------------------|-----------|--------------------------------------|
| <b>Time frame: Since the initial planning of the work</b> |                                                                                                                                                                                |                                                                                                                                                                                                                                                                                                                                                                                     |              |                                      |      |                                           |                     |                                      |           |                                      |
| <b>1</b>                                                  | All support for the present manuscript (e.g., funding, provision of study materials, medical writing, article processing charges, etc.)<br><b>No time limit for this item.</b> | <input type="checkbox"/> <b>None</b><br><table border="1"> <tr> <td>Medtronic</td><td>Research support paid to Institution</td></tr> <tr> <td></td><td>Click the tab key to add additional rows.</td></tr> </table>                                                                                                                                                                 | Medtronic    | Research support paid to Institution |      | Click the tab key to add additional rows. |                     |                                      |           |                                      |
| Medtronic                                                 | Research support paid to Institution                                                                                                                                           |                                                                                                                                                                                                                                                                                                                                                                                     |              |                                      |      |                                           |                     |                                      |           |                                      |
|                                                           | Click the tab key to add additional rows.                                                                                                                                      |                                                                                                                                                                                                                                                                                                                                                                                     |              |                                      |      |                                           |                     |                                      |           |                                      |
| <b>Time frame: past 36 months</b>                         |                                                                                                                                                                                |                                                                                                                                                                                                                                                                                                                                                                                     |              |                                      |      |                                           |                     |                                      |           |                                      |
| <b>2</b>                                                  | Grants or contracts from any entity (if not indicated in item #1 above).                                                                                                       | <input type="checkbox"/> <b>None</b><br><table border="1"> <tr> <td>MicroVention</td><td>Research support paid to Institution</td></tr> <tr> <td>Balt</td><td>Research support paid to Institution</td></tr> <tr> <td>Insera Therapeutics</td><td>Research support paid to Institution</td></tr> <tr> <td>Cerenovus</td><td>Research support paid to Institution</td></tr> </table> | MicroVention | Research support paid to Institution | Balt | Research support paid to Institution      | Insera Therapeutics | Research support paid to Institution | Cerenovus | Research support paid to Institution |
| MicroVention                                              | Research support paid to Institution                                                                                                                                           |                                                                                                                                                                                                                                                                                                                                                                                     |              |                                      |      |                                           |                     |                                      |           |                                      |
| Balt                                                      | Research support paid to Institution                                                                                                                                           |                                                                                                                                                                                                                                                                                                                                                                                     |              |                                      |      |                                           |                     |                                      |           |                                      |
| Insera Therapeutics                                       | Research support paid to Institution                                                                                                                                           |                                                                                                                                                                                                                                                                                                                                                                                     |              |                                      |      |                                           |                     |                                      |           |                                      |
| Cerenovus                                                 | Research support paid to Institution                                                                                                                                           |                                                                                                                                                                                                                                                                                                                                                                                     |              |                                      |      |                                           |                     |                                      |           |                                      |
| <b>3</b>                                                  | Royalties or licenses                                                                                                                                                          | <input type="checkbox"/> <b>None</b><br><table border="1"> <tr> <td>Medtronic</td><td>To me</td></tr> <tr> <td></td><td></td></tr> </table>                                                                                                                                                                                                                                         | Medtronic    | To me                                |      |                                           |                     |                                      |           |                                      |
| Medtronic                                                 | To me                                                                                                                                                                          |                                                                                                                                                                                                                                                                                                                                                                                     |              |                                      |      |                                           |                     |                                      |           |                                      |
|                                                           |                                                                                                                                                                                |                                                                                                                                                                                                                                                                                                                                                                                     |              |                                      |      |                                           |                     |                                      |           |                                      |

|                          |                                                                                                              | Name all entities with whom you have this relationship or indicate none (add rows as needed)                                                                                                                                               | Specifications/Comments (e.g., if payments were made to you or to your institution) |                                      |         |                                      |  |  |  |  |  |
|--------------------------|--------------------------------------------------------------------------------------------------------------|--------------------------------------------------------------------------------------------------------------------------------------------------------------------------------------------------------------------------------------------|-------------------------------------------------------------------------------------|--------------------------------------|---------|--------------------------------------|--|--|--|--|--|
| 4                        | Consulting fees                                                                                              | <input checked="" type="checkbox"/> <b>None</b><br><table border="1"> <tr><td></td><td></td></tr> <tr><td></td><td></td></tr> <tr><td></td><td></td></tr> <tr><td></td><td></td></tr> </table>                                             |                                                                                     |                                      |         |                                      |  |  |  |  |  |
|                          |                                                                                                              |                                                                                                                                                                                                                                            |                                                                                     |                                      |         |                                      |  |  |  |  |  |
|                          |                                                                                                              |                                                                                                                                                                                                                                            |                                                                                     |                                      |         |                                      |  |  |  |  |  |
|                          |                                                                                                              |                                                                                                                                                                                                                                            |                                                                                     |                                      |         |                                      |  |  |  |  |  |
|                          |                                                                                                              |                                                                                                                                                                                                                                            |                                                                                     |                                      |         |                                      |  |  |  |  |  |
| 5                        | Payment or honoraria for lectures, presentations, speakers bureaus, manuscript writing or educational events | <input checked="" type="checkbox"/> <b>None</b><br><table border="1"> <tr><td></td><td></td></tr> <tr><td></td><td></td></tr> <tr><td></td><td></td></tr> </table>                                                                         |                                                                                     |                                      |         |                                      |  |  |  |  |  |
|                          |                                                                                                              |                                                                                                                                                                                                                                            |                                                                                     |                                      |         |                                      |  |  |  |  |  |
|                          |                                                                                                              |                                                                                                                                                                                                                                            |                                                                                     |                                      |         |                                      |  |  |  |  |  |
|                          |                                                                                                              |                                                                                                                                                                                                                                            |                                                                                     |                                      |         |                                      |  |  |  |  |  |
| 6                        | Payment for expert testimony                                                                                 | <input checked="" type="checkbox"/> <b>None</b><br><table border="1"> <tr><td></td><td></td></tr> <tr><td></td><td></td></tr> <tr><td></td><td></td></tr> </table>                                                                         |                                                                                     |                                      |         |                                      |  |  |  |  |  |
|                          |                                                                                                              |                                                                                                                                                                                                                                            |                                                                                     |                                      |         |                                      |  |  |  |  |  |
|                          |                                                                                                              |                                                                                                                                                                                                                                            |                                                                                     |                                      |         |                                      |  |  |  |  |  |
|                          |                                                                                                              |                                                                                                                                                                                                                                            |                                                                                     |                                      |         |                                      |  |  |  |  |  |
| 7                        | Support for attending meetings and/or travel                                                                 | <input checked="" type="checkbox"/> <b>None</b><br><table border="1"> <tr><td></td><td></td></tr> <tr><td></td><td></td></tr> <tr><td></td><td></td></tr> </table>                                                                         |                                                                                     |                                      |         |                                      |  |  |  |  |  |
|                          |                                                                                                              |                                                                                                                                                                                                                                            |                                                                                     |                                      |         |                                      |  |  |  |  |  |
|                          |                                                                                                              |                                                                                                                                                                                                                                            |                                                                                     |                                      |         |                                      |  |  |  |  |  |
|                          |                                                                                                              |                                                                                                                                                                                                                                            |                                                                                     |                                      |         |                                      |  |  |  |  |  |
| 8                        | Patents planned, issued or pending                                                                           | <input type="checkbox"/> <b>None</b><br><table border="1"> <tr><td>Balloon Guide Technology</td><td></td></tr> <tr><td></td><td></td></tr> <tr><td></td><td></td></tr> </table>                                                            | Balloon Guide Technology                                                            |                                      |         |                                      |  |  |  |  |  |
| Balloon Guide Technology |                                                                                                              |                                                                                                                                                                                                                                            |                                                                                     |                                      |         |                                      |  |  |  |  |  |
|                          |                                                                                                              |                                                                                                                                                                                                                                            |                                                                                     |                                      |         |                                      |  |  |  |  |  |
|                          |                                                                                                              |                                                                                                                                                                                                                                            |                                                                                     |                                      |         |                                      |  |  |  |  |  |
| 9                        | Participation on a Data Safety Monitoring Board or Advisory Board                                            | <input type="checkbox"/> <b>None</b><br><table border="1"> <tr><td>NoNO</td><td>Research support paid to Institution</td></tr> <tr><td>Vesalio</td><td>Research support paid to Institution</td></tr> <tr><td></td><td></td></tr> </table> | NoNO                                                                                | Research support paid to Institution | Vesalio | Research support paid to Institution |  |  |  |  |  |
| NoNO                     | Research support paid to Institution                                                                         |                                                                                                                                                                                                                                            |                                                                                     |                                      |         |                                      |  |  |  |  |  |
| Vesalio                  | Research support paid to Institution                                                                         |                                                                                                                                                                                                                                            |                                                                                     |                                      |         |                                      |  |  |  |  |  |
|                          |                                                                                                              |                                                                                                                                                                                                                                            |                                                                                     |                                      |         |                                      |  |  |  |  |  |
| 10                       | Leadership or fiduciary role in other board, society, committee or advocacy group, paid or unpaid            | <input checked="" type="checkbox"/> <b>None</b><br><table border="1"> <tr><td></td><td></td></tr> <tr><td></td><td></td></tr> <tr><td></td><td></td></tr> </table>                                                                         |                                                                                     |                                      |         |                                      |  |  |  |  |  |
|                          |                                                                                                              |                                                                                                                                                                                                                                            |                                                                                     |                                      |         |                                      |  |  |  |  |  |
|                          |                                                                                                              |                                                                                                                                                                                                                                            |                                                                                     |                                      |         |                                      |  |  |  |  |  |
|                          |                                                                                                              |                                                                                                                                                                                                                                            |                                                                                     |                                      |         |                                      |  |  |  |  |  |

|           |                                                                                  | Name all entities with whom you have this relationship or indicate none (add rows as needed) | Specifications/Comments (e.g., if payments were made to you or to your institution) |
|-----------|----------------------------------------------------------------------------------|----------------------------------------------------------------------------------------------|-------------------------------------------------------------------------------------|
| <b>11</b> | Stock or stock options                                                           | <input type="checkbox"/> <b>None</b>                                                         |                                                                                     |
|           |                                                                                  | Marblehead Medical                                                                           |                                                                                     |
|           |                                                                                  | Conway Medical                                                                               |                                                                                     |
|           |                                                                                  | Nested Knowledge                                                                             |                                                                                     |
|           |                                                                                  | Superior Medical Experts                                                                     |                                                                                     |
| <b>12</b> | Receipt of equipment, materials, drugs, medical writing, gifts or other services | <input checked="" type="checkbox"/> <b>None</b>                                              |                                                                                     |
|           |                                                                                  |                                                                                              |                                                                                     |
|           |                                                                                  |                                                                                              |                                                                                     |
|           |                                                                                  |                                                                                              |                                                                                     |
| <b>13</b> | Other financial or non-financial interests                                       | <input checked="" type="checkbox"/> <b>None</b>                                              |                                                                                     |
|           |                                                                                  |                                                                                              |                                                                                     |
|           |                                                                                  |                                                                                              |                                                                                     |
|           |                                                                                  |                                                                                              |                                                                                     |

**Please place an "X" next to the following statement to indicate your agreement:**

☒ I certify that I have answered every question and have not altered the wording of any of the questions on this form.

ICMJE DISCLOSURE FORM

Date:

1/18/2022

Your Name:

Demetrius Lopes

Manuscript Title:

Prospective Study on Embolization of Intracranial Aneurysms with the Pipeline Device (PREMIER study): 3-year results with the application of a flow diverter-specific occlusion classification

Manuscript Number (if known):

neurintsurg-2021-018501

In the interest of transparency, we ask you to disclose all relationships/activities/interests listed below that are related to the content of your manuscript. “Related” means any relation with for-profit or not-for-profit third parties whose interests may be affected by the content of the manuscript. Disclosure represents a commitment to transparency and does not necessarily indicate a bias. If you are in doubt about whether to list a relationship/activity/interest, it is preferable that you do so.

The author’s relationships/activities/interests should be defined broadly. For example, if your manuscript pertains to the epidemiology of hypertension, you should declare all relationships with manufacturers of antihypertensive medication, even if that medication is not mentioned in the manuscript.

In item #1 below, report all support for the work reported in this manuscript without time limit. For all other items, the time frame for disclosure is the past 36 months.

|                                                    | Name all entities with whom you have this relationship or indicate none (add rows as needed)                                                                                                                                                                                                                                                                                      | Specifications/Comments (e.g., if payments were made to you or to your institution) |  |  |  |  |                                           |  |
|----------------------------------------------------|-----------------------------------------------------------------------------------------------------------------------------------------------------------------------------------------------------------------------------------------------------------------------------------------------------------------------------------------------------------------------------------|-------------------------------------------------------------------------------------|--|--|--|--|-------------------------------------------|--|
| Time frame: Since the initial planning of the work |                                                                                                                                                                                                                                                                                                                                                                                   |                                                                                     |  |  |  |  |                                           |  |
| 1                                                  | <div>All support for the present manuscript (e.g., funding, provision of study materials, medical writing, article processing charges, etc.)<br/>No time limit for this item.</div> <div><input checked="" type="checkbox"/> None</div> <table><tr><td></td><td></td></tr><tr><td></td><td></td></tr><tr><td></td><td>Click the tab key to add additional rows.</td></tr></table> |                                                                                     |  |  |  |  | Click the tab key to add additional rows. |  |
|                                                    |                                                                                                                                                                                                                                                                                                                                                                                   |                                                                                     |  |  |  |  |                                           |  |
|                                                    |                                                                                                                                                                                                                                                                                                                                                                                   |                                                                                     |  |  |  |  |                                           |  |
|                                                    | Click the tab key to add additional rows.                                                                                                                                                                                                                                                                                                                                         |                                                                                     |  |  |  |  |                                           |  |
| Time frame: past 36 months                         |                                                                                                                                                                                                                                                                                                                                                                                   |                                                                                     |  |  |  |  |                                           |  |
| 2                                                  | <div>Grants or contracts from any entity (if not indicated in item #1 above).</div> <div><input checked="" type="checkbox"/> None</div> <table><tr><td></td><td></td></tr><tr><td></td><td></td></tr><tr><td></td><td></td></tr></table>                                                                                                                                          |                                                                                     |  |  |  |  |                                           |  |
|                                                    |                                                                                                                                                                                                                                                                                                                                                                                   |                                                                                     |  |  |  |  |                                           |  |
|                                                    |                                                                                                                                                                                                                                                                                                                                                                                   |                                                                                     |  |  |  |  |                                           |  |
|                                                    |                                                                                                                                                                                                                                                                                                                                                                                   |                                                                                     |  |  |  |  |                                           |  |
| 3                                                  | <div>Royalties or licenses</div> <div><input checked="" type="checkbox"/> None</div> <table><tr><td></td><td></td></tr><tr><td></td><td></td></tr><tr><td></td><td></td></tr></table>                                                                                                                                                                                             |                                                                                     |  |  |  |  |                                           |  |
|                                                    |                                                                                                                                                                                                                                                                                                                                                                                   |                                                                                     |  |  |  |  |                                           |  |
|                                                    |                                                                                                                                                                                                                                                                                                                                                                                   |                                                                                     |  |  |  |  |                                           |  |
|                                                    |                                                                                                                                                                                                                                                                                                                                                                                   |                                                                                     |  |  |  |  |                                           |  |

|                                     |                                                                                                              | Name all entities with whom you have this relationship or indicate none (add rows as needed)                                                                                                      | Specifications/Comments (e.g., if payments were made to you or to your institution) |  |           |  |         |  |  |  |  |
|-------------------------------------|--------------------------------------------------------------------------------------------------------------|---------------------------------------------------------------------------------------------------------------------------------------------------------------------------------------------------|-------------------------------------------------------------------------------------|--|-----------|--|---------|--|--|--|--|
| 4                                   | Consulting fees                                                                                              | <input type="checkbox"/> None<br><table border="1"> <tr><td>Asahi</td><td></td></tr> <tr><td>Medtronic</td><td></td></tr> <tr><td>Stryker</td><td></td></tr> <tr><td></td><td></td></tr> </table> | Asahi                                                                               |  | Medtronic |  | Stryker |  |  |  |  |
| Asahi                               |                                                                                                              |                                                                                                                                                                                                   |                                                                                     |  |           |  |         |  |  |  |  |
| Medtronic                           |                                                                                                              |                                                                                                                                                                                                   |                                                                                     |  |           |  |         |  |  |  |  |
| Stryker                             |                                                                                                              |                                                                                                                                                                                                   |                                                                                     |  |           |  |         |  |  |  |  |
|                                     |                                                                                                              |                                                                                                                                                                                                   |                                                                                     |  |           |  |         |  |  |  |  |
| 5                                   | Payment or honoraria for lectures, presentations, speakers bureaus, manuscript writing or educational events | <input type="checkbox"/> None<br><table border="1"> <tr><td>Siemens</td><td></td></tr> <tr><td>Medtronic</td><td></td></tr> <tr><td>Stryker</td><td></td></tr> </table> Phenox                    | Siemens                                                                             |  | Medtronic |  | Stryker |  |  |  |  |
| Siemens                             |                                                                                                              |                                                                                                                                                                                                   |                                                                                     |  |           |  |         |  |  |  |  |
| Medtronic                           |                                                                                                              |                                                                                                                                                                                                   |                                                                                     |  |           |  |         |  |  |  |  |
| Stryker                             |                                                                                                              |                                                                                                                                                                                                   |                                                                                     |  |           |  |         |  |  |  |  |
| 6                                   | Payment for expert testimony                                                                                 | <input type="checkbox"/> None<br><table border="1"> <tr><td></td><td></td></tr> <tr><td></td><td></td></tr> <tr><td></td><td></td></tr> </table>                                                  |                                                                                     |  |           |  |         |  |  |  |  |
|                                     |                                                                                                              |                                                                                                                                                                                                   |                                                                                     |  |           |  |         |  |  |  |  |
|                                     |                                                                                                              |                                                                                                                                                                                                   |                                                                                     |  |           |  |         |  |  |  |  |
|                                     |                                                                                                              |                                                                                                                                                                                                   |                                                                                     |  |           |  |         |  |  |  |  |
| 7                                   | Support for attending meetings and/or travel                                                                 | <input type="checkbox"/> None<br><table border="1"> <tr><td></td><td></td></tr> <tr><td></td><td></td></tr> <tr><td></td><td></td></tr> </table>                                                  |                                                                                     |  |           |  |         |  |  |  |  |
|                                     |                                                                                                              |                                                                                                                                                                                                   |                                                                                     |  |           |  |         |  |  |  |  |
|                                     |                                                                                                              |                                                                                                                                                                                                   |                                                                                     |  |           |  |         |  |  |  |  |
|                                     |                                                                                                              |                                                                                                                                                                                                   |                                                                                     |  |           |  |         |  |  |  |  |
| 8                                   | Patents planned, issued or pending                                                                           | <input type="checkbox"/> None<br><table border="1"> <tr><td></td><td></td></tr> <tr><td></td><td></td></tr> <tr><td></td><td></td></tr> </table>                                                  |                                                                                     |  |           |  |         |  |  |  |  |
|                                     |                                                                                                              |                                                                                                                                                                                                   |                                                                                     |  |           |  |         |  |  |  |  |
|                                     |                                                                                                              |                                                                                                                                                                                                   |                                                                                     |  |           |  |         |  |  |  |  |
|                                     |                                                                                                              |                                                                                                                                                                                                   |                                                                                     |  |           |  |         |  |  |  |  |
| 9                                   | Participation on a Data Safety Monitoring Board or Advisory Board                                            | <input type="checkbox"/> None<br><table border="1"> <tr><td>ENVI, Necc and Advance trials</td><td></td></tr> <tr><td></td><td></td></tr> <tr><td></td><td></td></tr> </table>                     | ENVI, Necc and Advance trials                                                       |  |           |  |         |  |  |  |  |
| ENVI, Necc and Advance trials       |                                                                                                              |                                                                                                                                                                                                   |                                                                                     |  |           |  |         |  |  |  |  |
|                                     |                                                                                                              |                                                                                                                                                                                                   |                                                                                     |  |           |  |         |  |  |  |  |
|                                     |                                                                                                              |                                                                                                                                                                                                   |                                                                                     |  |           |  |         |  |  |  |  |
| 10                                  | Leadership or fiduciary role in other board, society, committee or advocacy group, paid or unpaid            | <input type="checkbox"/> None<br><table border="1"> <tr><td>World Live Neurovascular Conference</td><td></td></tr> <tr><td></td><td></td></tr> <tr><td></td><td></td></tr> </table>               | World Live Neurovascular Conference                                                 |  |           |  |         |  |  |  |  |
| World Live Neurovascular Conference |                                                                                                              |                                                                                                                                                                                                   |                                                                                     |  |           |  |         |  |  |  |  |
|                                     |                                                                                                              |                                                                                                                                                                                                   |                                                                                     |  |           |  |         |  |  |  |  |
|                                     |                                                                                                              |                                                                                                                                                                                                   |                                                                                     |  |           |  |         |  |  |  |  |

|                                                                                                                                                                                                                                                               |                                                                                  | Name all entities with whom you have this relationship or indicate none (add rows as needed)                                                                                                                                                                                      | Specifications/Comments (e.g., if payments were made to you or to your institution) |                                                                                                               |  |  |  |  |  |
|---------------------------------------------------------------------------------------------------------------------------------------------------------------------------------------------------------------------------------------------------------------|----------------------------------------------------------------------------------|-----------------------------------------------------------------------------------------------------------------------------------------------------------------------------------------------------------------------------------------------------------------------------------|-------------------------------------------------------------------------------------|---------------------------------------------------------------------------------------------------------------|--|--|--|--|--|
| <b>11</b>                                                                                                                                                                                                                                                     | Stock or stock options                                                           | <input type="checkbox"/> <b>None</b><br><table border="1"> <tr> <td>Elum, Vastrax, Sim&amp;Cure, Viz.AI, Methinks, Synchron, Three Rivers, Bendit, Q'apel, Galaxy, NDI, MIVI, NextGen</td> <td></td> </tr> <tr> <td></td> <td></td> </tr> <tr> <td></td> <td></td> </tr> </table> |                                                                                     | Elum, Vastrax, Sim&Cure, Viz.AI, Methinks, Synchron, Three Rivers, Bendit, Q'apel, Galaxy, NDI, MIVI, NextGen |  |  |  |  |  |
| Elum, Vastrax, Sim&Cure, Viz.AI, Methinks, Synchron, Three Rivers, Bendit, Q'apel, Galaxy, NDI, MIVI, NextGen                                                                                                                                                 |                                                                                  |                                                                                                                                                                                                                                                                                   |                                                                                     |                                                                                                               |  |  |  |  |  |
|                                                                                                                                                                                                                                                               |                                                                                  |                                                                                                                                                                                                                                                                                   |                                                                                     |                                                                                                               |  |  |  |  |  |
|                                                                                                                                                                                                                                                               |                                                                                  |                                                                                                                                                                                                                                                                                   |                                                                                     |                                                                                                               |  |  |  |  |  |
| <b>12</b>                                                                                                                                                                                                                                                     | Receipt of equipment, materials, drugs, medical writing, gifts or other services | <input type="checkbox"/> <b>None</b><br><table border="1"> <tr> <td></td> <td></td> </tr> <tr> <td></td> <td></td> </tr> <tr> <td></td> <td></td> </tr> </table>                                                                                                                  |                                                                                     |                                                                                                               |  |  |  |  |  |
|                                                                                                                                                                                                                                                               |                                                                                  |                                                                                                                                                                                                                                                                                   |                                                                                     |                                                                                                               |  |  |  |  |  |
|                                                                                                                                                                                                                                                               |                                                                                  |                                                                                                                                                                                                                                                                                   |                                                                                     |                                                                                                               |  |  |  |  |  |
|                                                                                                                                                                                                                                                               |                                                                                  |                                                                                                                                                                                                                                                                                   |                                                                                     |                                                                                                               |  |  |  |  |  |
| <b>13</b>                                                                                                                                                                                                                                                     | Other financial or non-financial interests                                       | <input checked="" type="checkbox"/> <b>None</b><br><table border="1"> <tr> <td></td> <td></td> </tr> <tr> <td></td> <td></td> </tr> <tr> <td></td> <td></td> </tr> </table>                                                                                                       |                                                                                     |                                                                                                               |  |  |  |  |  |
|                                                                                                                                                                                                                                                               |                                                                                  |                                                                                                                                                                                                                                                                                   |                                                                                     |                                                                                                               |  |  |  |  |  |
|                                                                                                                                                                                                                                                               |                                                                                  |                                                                                                                                                                                                                                                                                   |                                                                                     |                                                                                                               |  |  |  |  |  |
|                                                                                                                                                                                                                                                               |                                                                                  |                                                                                                                                                                                                                                                                                   |                                                                                     |                                                                                                               |  |  |  |  |  |
| <p><b>Please place an "X" next to the following statement to indicate your agreement:</b></p> <p><input checked="" type="checkbox"/> I certify that I have answered every question and have not altered the wording of any of the questions on this form.</p> |                                                                                  |                                                                                                                                                                                                                                                                                   |                                                                                     |                                                                                                               |  |  |  |  |  |

## ICMJE DISCLOSURE FORM

**Date:** 1/24/2022

**Your Name:** Donald Frei, MD

**Manuscript Title:** Prospective Study on Embolization of Intracranial Aneurysms with the Pipeline Device (PREMIER study): 3-year results with the application of a flow diverter-specific occlusion classification

**Manuscript Number (if known):** neurintsurg-2021-018501

In the interest of transparency, we ask you to disclose all relationships/activities/interests listed below that are related to the content of your manuscript. "Related" means any relation with for-profit or not-for-profit third parties whose interests may be affected by the content of the manuscript. Disclosure represents a commitment to transparency and does not necessarily indicate a bias. If you are in doubt about whether to list a relationship/activity/interest, it is preferable that you do so.

The author's relationships/activities/interests should be defined broadly. For example, if your manuscript pertains to the epidemiology of hypertension, you should declare all relationships with manufacturers of antihypertensive medication, even if that medication is not mentioned in the manuscript.

In item #1 below, report all support for the work reported in this manuscript without time limit. For all other items, the time frame for disclosure is the past 36 months.

|                                                           | Name all entities with whom you have this relationship or indicate none (add rows as needed)                                                                                   | Specifications/Comments (e.g., if payments were made to you or to your institution)                                                                                                                          |  |  |  |  |  |  |
|-----------------------------------------------------------|--------------------------------------------------------------------------------------------------------------------------------------------------------------------------------|--------------------------------------------------------------------------------------------------------------------------------------------------------------------------------------------------------------|--|--|--|--|--|--|
| <b>Time frame: Since the initial planning of the work</b> |                                                                                                                                                                                |                                                                                                                                                                                                              |  |  |  |  |  |  |
| <b>1</b>                                                  | All support for the present manuscript (e.g., funding, provision of study materials, medical writing, article processing charges, etc.)<br><b>No time limit for this item.</b> | <input checked="" type="checkbox"/> <b>None</b><br><table border="1"> <tr><td></td><td></td></tr> <tr><td></td><td></td></tr> <tr><td></td><td></td></tr> </table> Click the tab key to add additional rows. |  |  |  |  |  |  |
|                                                           |                                                                                                                                                                                |                                                                                                                                                                                                              |  |  |  |  |  |  |
|                                                           |                                                                                                                                                                                |                                                                                                                                                                                                              |  |  |  |  |  |  |
|                                                           |                                                                                                                                                                                |                                                                                                                                                                                                              |  |  |  |  |  |  |
| <b>Time frame: past 36 months</b>                         |                                                                                                                                                                                |                                                                                                                                                                                                              |  |  |  |  |  |  |
| <b>2</b>                                                  | Grants or contracts from any entity (if not indicated in item #1 above).                                                                                                       | <input checked="" type="checkbox"/> <b>None</b><br><table border="1"> <tr><td></td><td></td></tr> <tr><td></td><td></td></tr> <tr><td></td><td></td></tr> </table>                                           |  |  |  |  |  |  |
|                                                           |                                                                                                                                                                                |                                                                                                                                                                                                              |  |  |  |  |  |  |
|                                                           |                                                                                                                                                                                |                                                                                                                                                                                                              |  |  |  |  |  |  |
|                                                           |                                                                                                                                                                                |                                                                                                                                                                                                              |  |  |  |  |  |  |
| <b>3</b>                                                  | Royalties or licenses                                                                                                                                                          | <input checked="" type="checkbox"/> <b>None</b><br><table border="1"> <tr><td></td><td></td></tr> <tr><td></td><td></td></tr> <tr><td></td><td></td></tr> </table>                                           |  |  |  |  |  |  |
|                                                           |                                                                                                                                                                                |                                                                                                                                                                                                              |  |  |  |  |  |  |
|                                                           |                                                                                                                                                                                |                                                                                                                                                                                                              |  |  |  |  |  |  |
|                                                           |                                                                                                                                                                                |                                                                                                                                                                                                              |  |  |  |  |  |  |



|          |                                                                                                              | Name all entities with whom you have this relationship or indicate none (add rows as needed)                                                                                                                                                                                                          | Specifications/Comments (e.g., if payments were made to you or to your institution) |                            |         |                            |          |                            |  |  |  |
|----------|--------------------------------------------------------------------------------------------------------------|-------------------------------------------------------------------------------------------------------------------------------------------------------------------------------------------------------------------------------------------------------------------------------------------------------|-------------------------------------------------------------------------------------|----------------------------|---------|----------------------------|----------|----------------------------|--|--|--|
| 4        | Consulting fees                                                                                              | <input type="checkbox"/> None<br><table border="1"> <tr> <td>Siemens</td> <td>Payments to me, &lt; \$10,000</td> </tr> <tr> <td>Stryker</td> <td>Payments to me, &lt; \$10,000</td> </tr> <tr> <td>Penumbra</td> <td>Payments to me, &lt; \$10,000</td> </tr> <tr> <td></td> <td></td> </tr> </table> | Siemens                                                                             | Payments to me, < \$10,000 | Stryker | Payments to me, < \$10,000 | Penumbra | Payments to me, < \$10,000 |  |  |  |
| Siemens  | Payments to me, < \$10,000                                                                                   |                                                                                                                                                                                                                                                                                                       |                                                                                     |                            |         |                            |          |                            |  |  |  |
| Stryker  | Payments to me, < \$10,000                                                                                   |                                                                                                                                                                                                                                                                                                       |                                                                                     |                            |         |                            |          |                            |  |  |  |
| Penumbra | Payments to me, < \$10,000                                                                                   |                                                                                                                                                                                                                                                                                                       |                                                                                     |                            |         |                            |          |                            |  |  |  |
|          |                                                                                                              |                                                                                                                                                                                                                                                                                                       |                                                                                     |                            |         |                            |          |                            |  |  |  |
| 5        | Payment or honoraria for lectures, presentations, speakers bureaus, manuscript writing or educational events | <input type="checkbox"/> None<br><table border="1"> <tr> <td>Penumbra</td> <td>Payments to me, &lt; \$10,000</td> </tr> <tr> <td>Stryker</td> <td>Payments to me, &lt; \$10,000</td> </tr> <tr> <td></td> <td></td> </tr> </table>                                                                    | Penumbra                                                                            | Payments to me, < \$10,000 | Stryker | Payments to me, < \$10,000 |          |                            |  |  |  |
| Penumbra | Payments to me, < \$10,000                                                                                   |                                                                                                                                                                                                                                                                                                       |                                                                                     |                            |         |                            |          |                            |  |  |  |
| Stryker  | Payments to me, < \$10,000                                                                                   |                                                                                                                                                                                                                                                                                                       |                                                                                     |                            |         |                            |          |                            |  |  |  |
|          |                                                                                                              |                                                                                                                                                                                                                                                                                                       |                                                                                     |                            |         |                            |          |                            |  |  |  |
| 6        | Payment for expert testimony                                                                                 | <input checked="" type="checkbox"/> None<br><table border="1"> <tr> <td></td> <td></td> </tr> <tr> <td></td> <td></td> </tr> <tr> <td></td> <td></td> </tr> </table>                                                                                                                                  |                                                                                     |                            |         |                            |          |                            |  |  |  |
|          |                                                                                                              |                                                                                                                                                                                                                                                                                                       |                                                                                     |                            |         |                            |          |                            |  |  |  |
|          |                                                                                                              |                                                                                                                                                                                                                                                                                                       |                                                                                     |                            |         |                            |          |                            |  |  |  |
|          |                                                                                                              |                                                                                                                                                                                                                                                                                                       |                                                                                     |                            |         |                            |          |                            |  |  |  |
| 7        | Support for attending meetings and/or travel                                                                 | <input checked="" type="checkbox"/> None<br><table border="1"> <tr> <td></td> <td></td> </tr> <tr> <td></td> <td></td> </tr> <tr> <td></td> <td></td> </tr> </table>                                                                                                                                  |                                                                                     |                            |         |                            |          |                            |  |  |  |
|          |                                                                                                              |                                                                                                                                                                                                                                                                                                       |                                                                                     |                            |         |                            |          |                            |  |  |  |
|          |                                                                                                              |                                                                                                                                                                                                                                                                                                       |                                                                                     |                            |         |                            |          |                            |  |  |  |
|          |                                                                                                              |                                                                                                                                                                                                                                                                                                       |                                                                                     |                            |         |                            |          |                            |  |  |  |
| 8        | Patents planned, issued or pending                                                                           | <input checked="" type="checkbox"/> None<br><table border="1"> <tr> <td></td> <td></td> </tr> <tr> <td></td> <td></td> </tr> <tr> <td></td> <td></td> </tr> </table>                                                                                                                                  |                                                                                     |                            |         |                            |          |                            |  |  |  |
|          |                                                                                                              |                                                                                                                                                                                                                                                                                                       |                                                                                     |                            |         |                            |          |                            |  |  |  |
|          |                                                                                                              |                                                                                                                                                                                                                                                                                                       |                                                                                     |                            |         |                            |          |                            |  |  |  |
|          |                                                                                                              |                                                                                                                                                                                                                                                                                                       |                                                                                     |                            |         |                            |          |                            |  |  |  |
| 9        | Participation on a Data Safety Monitoring Board or Advisory Board                                            | <input type="checkbox"/> None<br><table border="1"> <tr> <td>EVASC</td> <td></td> </tr> <tr> <td></td> <td></td> </tr> <tr> <td></td> <td></td> </tr> </table>                                                                                                                                        | EVASC                                                                               |                            |         |                            |          |                            |  |  |  |
| EVASC    |                                                                                                              |                                                                                                                                                                                                                                                                                                       |                                                                                     |                            |         |                            |          |                            |  |  |  |
|          |                                                                                                              |                                                                                                                                                                                                                                                                                                       |                                                                                     |                            |         |                            |          |                            |  |  |  |
|          |                                                                                                              |                                                                                                                                                                                                                                                                                                       |                                                                                     |                            |         |                            |          |                            |  |  |  |
| 10       | Leadership or fiduciary role in other board, society, committee or advocacy group, paid or unpaid            | <input checked="" type="checkbox"/> None<br><table border="1"> <tr> <td></td> <td></td> </tr> <tr> <td></td> <td></td> </tr> <tr> <td></td> <td></td> </tr> </table>                                                                                                                                  |                                                                                     |                            |         |                            |          |                            |  |  |  |
|          |                                                                                                              |                                                                                                                                                                                                                                                                                                       |                                                                                     |                            |         |                            |          |                            |  |  |  |
|          |                                                                                                              |                                                                                                                                                                                                                                                                                                       |                                                                                     |                            |         |                            |          |                            |  |  |  |
|          |                                                                                                              |                                                                                                                                                                                                                                                                                                       |                                                                                     |                            |         |                            |          |                            |  |  |  |

|                                                                                                                                                                                                                                                               |                                                                                  | Name all entities with whom you have this relationship or indicate none (add rows as needed)                                                                                                    | Specifications/Comments (e.g., if payments were made to you or to your institution) |  |  |  |  |  |  |
|---------------------------------------------------------------------------------------------------------------------------------------------------------------------------------------------------------------------------------------------------------------|----------------------------------------------------------------------------------|-------------------------------------------------------------------------------------------------------------------------------------------------------------------------------------------------|-------------------------------------------------------------------------------------|--|--|--|--|--|--|
| <b>11</b>                                                                                                                                                                                                                                                     | Stock or stock options                                                           | <input checked="" type="checkbox"/> <b>None</b><br><table border="1" data-bbox="415 342 1437 434"> <tr><td></td><td></td></tr> <tr><td></td><td></td></tr> <tr><td></td><td></td></tr> </table> |                                                                                     |  |  |  |  |  |  |
|                                                                                                                                                                                                                                                               |                                                                                  |                                                                                                                                                                                                 |                                                                                     |  |  |  |  |  |  |
|                                                                                                                                                                                                                                                               |                                                                                  |                                                                                                                                                                                                 |                                                                                     |  |  |  |  |  |  |
|                                                                                                                                                                                                                                                               |                                                                                  |                                                                                                                                                                                                 |                                                                                     |  |  |  |  |  |  |
| <b>12</b>                                                                                                                                                                                                                                                     | Receipt of equipment, materials, drugs, medical writing, gifts or other services | <input checked="" type="checkbox"/> <b>None</b><br><table border="1" data-bbox="415 537 1437 630"> <tr><td></td><td></td></tr> <tr><td></td><td></td></tr> <tr><td></td><td></td></tr> </table> |                                                                                     |  |  |  |  |  |  |
|                                                                                                                                                                                                                                                               |                                                                                  |                                                                                                                                                                                                 |                                                                                     |  |  |  |  |  |  |
|                                                                                                                                                                                                                                                               |                                                                                  |                                                                                                                                                                                                 |                                                                                     |  |  |  |  |  |  |
|                                                                                                                                                                                                                                                               |                                                                                  |                                                                                                                                                                                                 |                                                                                     |  |  |  |  |  |  |
| <b>13</b>                                                                                                                                                                                                                                                     | Other financial or non-financial interests                                       | <input checked="" type="checkbox"/> <b>None</b><br><table border="1" data-bbox="415 732 1437 825"> <tr><td></td><td></td></tr> <tr><td></td><td></td></tr> <tr><td></td><td></td></tr> </table> |                                                                                     |  |  |  |  |  |  |
|                                                                                                                                                                                                                                                               |                                                                                  |                                                                                                                                                                                                 |                                                                                     |  |  |  |  |  |  |
|                                                                                                                                                                                                                                                               |                                                                                  |                                                                                                                                                                                                 |                                                                                     |  |  |  |  |  |  |
|                                                                                                                                                                                                                                                               |                                                                                  |                                                                                                                                                                                                 |                                                                                     |  |  |  |  |  |  |
| <p><b>Please place an "X" next to the following statement to indicate your agreement:</b></p> <p><input checked="" type="checkbox"/> I certify that I have answered every question and have not altered the wording of any of the questions on this form.</p> |                                                                                  |                                                                                                                                                                                                 |                                                                                     |  |  |  |  |  |  |

## ICMJE DISCLOSURE FORM

**Date:** 1/26/2022

**Your Name:** Frank R Hellinger, MD

**Manuscript Title:** Prospective Study on Embolization of Intracranial Aneurysms with the Pipeline Device (PREMIER study): 3-year results with the application of a flow diverter-specific occlusion classification

**Manuscript Number (if known):** neurintsurg-2021-018501

In the interest of transparency, we ask you to disclose all relationships/activities/interests listed below that are related to the content of your manuscript. "Related" means any relation with for-profit or not-for-profit third parties whose interests may be affected by the content of the manuscript. Disclosure represents a commitment to transparency and does not necessarily indicate a bias. If you are in doubt about whether to list a relationship/activity/interest, it is preferable that you do so.

The author's relationships/activities/interests should be defined broadly. For example, if your manuscript pertains to the epidemiology of hypertension, you should declare all relationships with manufacturers of antihypertensive medication, even if that medication is not mentioned in the manuscript.

In item #1 below, report all support for the work reported in this manuscript without time limit. For all other items, the time frame for disclosure is the past 36 months.

|                                                           | Name all entities with whom you have this relationship or indicate none (add rows as needed)                                                                                   | Specifications/Comments (e.g., if payments were made to you or to your institution)                                                                                                                          |  |  |  |  |  |  |
|-----------------------------------------------------------|--------------------------------------------------------------------------------------------------------------------------------------------------------------------------------|--------------------------------------------------------------------------------------------------------------------------------------------------------------------------------------------------------------|--|--|--|--|--|--|
| <b>Time frame: Since the initial planning of the work</b> |                                                                                                                                                                                |                                                                                                                                                                                                              |  |  |  |  |  |  |
| <b>1</b>                                                  | All support for the present manuscript (e.g., funding, provision of study materials, medical writing, article processing charges, etc.)<br><b>No time limit for this item.</b> | <input checked="" type="checkbox"/> <b>None</b><br><table border="1"> <tr><td></td><td></td></tr> <tr><td></td><td></td></tr> <tr><td></td><td></td></tr> </table> Click the tab key to add additional rows. |  |  |  |  |  |  |
|                                                           |                                                                                                                                                                                |                                                                                                                                                                                                              |  |  |  |  |  |  |
|                                                           |                                                                                                                                                                                |                                                                                                                                                                                                              |  |  |  |  |  |  |
|                                                           |                                                                                                                                                                                |                                                                                                                                                                                                              |  |  |  |  |  |  |
| <b>Time frame: past 36 months</b>                         |                                                                                                                                                                                |                                                                                                                                                                                                              |  |  |  |  |  |  |
| <b>2</b>                                                  | Grants or contracts from any entity (if not indicated in item #1 above).                                                                                                       | <input checked="" type="checkbox"/> <b>None</b><br><table border="1"> <tr><td></td><td></td></tr> <tr><td></td><td></td></tr> <tr><td></td><td></td></tr> </table>                                           |  |  |  |  |  |  |
|                                                           |                                                                                                                                                                                |                                                                                                                                                                                                              |  |  |  |  |  |  |
|                                                           |                                                                                                                                                                                |                                                                                                                                                                                                              |  |  |  |  |  |  |
|                                                           |                                                                                                                                                                                |                                                                                                                                                                                                              |  |  |  |  |  |  |
| <b>3</b>                                                  | Royalties or licenses                                                                                                                                                          | <input checked="" type="checkbox"/> <b>None</b><br><table border="1"> <tr><td></td><td></td></tr> <tr><td></td><td></td></tr> <tr><td></td><td></td></tr> </table>                                           |  |  |  |  |  |  |
|                                                           |                                                                                                                                                                                |                                                                                                                                                                                                              |  |  |  |  |  |  |
|                                                           |                                                                                                                                                                                |                                                                                                                                                                                                              |  |  |  |  |  |  |
|                                                           |                                                                                                                                                                                |                                                                                                                                                                                                              |  |  |  |  |  |  |

|    |                                                                                                              | Name all entities with whom you have this relationship or indicate none (add rows as needed)                                                                                                   | Specifications/Comments (e.g., if payments were made to you or to your institution) |  |  |  |  |  |  |  |  |
|----|--------------------------------------------------------------------------------------------------------------|------------------------------------------------------------------------------------------------------------------------------------------------------------------------------------------------|-------------------------------------------------------------------------------------|--|--|--|--|--|--|--|--|
| 4  | Consulting fees                                                                                              | <input checked="" type="checkbox"/> <b>None</b><br><table border="1"> <tr><td></td><td></td></tr> <tr><td></td><td></td></tr> <tr><td></td><td></td></tr> <tr><td></td><td></td></tr> </table> |                                                                                     |  |  |  |  |  |  |  |  |
|    |                                                                                                              |                                                                                                                                                                                                |                                                                                     |  |  |  |  |  |  |  |  |
|    |                                                                                                              |                                                                                                                                                                                                |                                                                                     |  |  |  |  |  |  |  |  |
|    |                                                                                                              |                                                                                                                                                                                                |                                                                                     |  |  |  |  |  |  |  |  |
|    |                                                                                                              |                                                                                                                                                                                                |                                                                                     |  |  |  |  |  |  |  |  |
| 5  | Payment or honoraria for lectures, presentations, speakers bureaus, manuscript writing or educational events | <input checked="" type="checkbox"/> <b>None</b><br><table border="1"> <tr><td></td><td></td></tr> <tr><td></td><td></td></tr> <tr><td></td><td></td></tr> </table>                             |                                                                                     |  |  |  |  |  |  |  |  |
|    |                                                                                                              |                                                                                                                                                                                                |                                                                                     |  |  |  |  |  |  |  |  |
|    |                                                                                                              |                                                                                                                                                                                                |                                                                                     |  |  |  |  |  |  |  |  |
|    |                                                                                                              |                                                                                                                                                                                                |                                                                                     |  |  |  |  |  |  |  |  |
| 6  | Payment for expert testimony                                                                                 | <input checked="" type="checkbox"/> <b>None</b><br><table border="1"> <tr><td></td><td></td></tr> <tr><td></td><td></td></tr> <tr><td></td><td></td></tr> </table>                             |                                                                                     |  |  |  |  |  |  |  |  |
|    |                                                                                                              |                                                                                                                                                                                                |                                                                                     |  |  |  |  |  |  |  |  |
|    |                                                                                                              |                                                                                                                                                                                                |                                                                                     |  |  |  |  |  |  |  |  |
|    |                                                                                                              |                                                                                                                                                                                                |                                                                                     |  |  |  |  |  |  |  |  |
| 7  | Support for attending meetings and/or travel                                                                 | <input checked="" type="checkbox"/> <b>None</b><br><table border="1"> <tr><td></td><td></td></tr> <tr><td></td><td></td></tr> <tr><td></td><td></td></tr> </table>                             |                                                                                     |  |  |  |  |  |  |  |  |
|    |                                                                                                              |                                                                                                                                                                                                |                                                                                     |  |  |  |  |  |  |  |  |
|    |                                                                                                              |                                                                                                                                                                                                |                                                                                     |  |  |  |  |  |  |  |  |
|    |                                                                                                              |                                                                                                                                                                                                |                                                                                     |  |  |  |  |  |  |  |  |
| 8  | Patents planned, issued or pending                                                                           | <input checked="" type="checkbox"/> <b>None</b><br><table border="1"> <tr><td></td><td></td></tr> <tr><td></td><td></td></tr> <tr><td></td><td></td></tr> </table>                             |                                                                                     |  |  |  |  |  |  |  |  |
|    |                                                                                                              |                                                                                                                                                                                                |                                                                                     |  |  |  |  |  |  |  |  |
|    |                                                                                                              |                                                                                                                                                                                                |                                                                                     |  |  |  |  |  |  |  |  |
|    |                                                                                                              |                                                                                                                                                                                                |                                                                                     |  |  |  |  |  |  |  |  |
| 9  | Participation on a Data Safety Monitoring Board or Advisory Board                                            | <input checked="" type="checkbox"/> <b>None</b><br><table border="1"> <tr><td></td><td></td></tr> <tr><td></td><td></td></tr> <tr><td></td><td></td></tr> </table>                             |                                                                                     |  |  |  |  |  |  |  |  |
|    |                                                                                                              |                                                                                                                                                                                                |                                                                                     |  |  |  |  |  |  |  |  |
|    |                                                                                                              |                                                                                                                                                                                                |                                                                                     |  |  |  |  |  |  |  |  |
|    |                                                                                                              |                                                                                                                                                                                                |                                                                                     |  |  |  |  |  |  |  |  |
| 10 | Leadership or fiduciary role in other board, society, committee or advocacy group, paid or unpaid            | <input checked="" type="checkbox"/> <b>None</b><br><table border="1"> <tr><td></td><td></td></tr> <tr><td></td><td></td></tr> <tr><td></td><td></td></tr> </table>                             |                                                                                     |  |  |  |  |  |  |  |  |
|    |                                                                                                              |                                                                                                                                                                                                |                                                                                     |  |  |  |  |  |  |  |  |
|    |                                                                                                              |                                                                                                                                                                                                |                                                                                     |  |  |  |  |  |  |  |  |
|    |                                                                                                              |                                                                                                                                                                                                |                                                                                     |  |  |  |  |  |  |  |  |

|                                                                                                                                                                                                                                                               |                                                                                  | Name all entities with whom you have this relationship or indicate none (add rows as needed)                                                                                            | Specifications/Comments (e.g., if payments were made to you or to your institution) |  |  |  |  |  |  |
|---------------------------------------------------------------------------------------------------------------------------------------------------------------------------------------------------------------------------------------------------------------|----------------------------------------------------------------------------------|-----------------------------------------------------------------------------------------------------------------------------------------------------------------------------------------|-------------------------------------------------------------------------------------|--|--|--|--|--|--|
| <b>11</b>                                                                                                                                                                                                                                                     | Stock or stock options                                                           | <input checked="" type="checkbox"/> <b>None</b><br><table border="1" style="width: 100%;"> <tr><td></td><td></td></tr> <tr><td></td><td></td></tr> <tr><td></td><td></td></tr> </table> |                                                                                     |  |  |  |  |  |  |
|                                                                                                                                                                                                                                                               |                                                                                  |                                                                                                                                                                                         |                                                                                     |  |  |  |  |  |  |
|                                                                                                                                                                                                                                                               |                                                                                  |                                                                                                                                                                                         |                                                                                     |  |  |  |  |  |  |
|                                                                                                                                                                                                                                                               |                                                                                  |                                                                                                                                                                                         |                                                                                     |  |  |  |  |  |  |
| <b>12</b>                                                                                                                                                                                                                                                     | Receipt of equipment, materials, drugs, medical writing, gifts or other services | <input checked="" type="checkbox"/> <b>None</b><br><table border="1" style="width: 100%;"> <tr><td></td><td></td></tr> <tr><td></td><td></td></tr> <tr><td></td><td></td></tr> </table> |                                                                                     |  |  |  |  |  |  |
|                                                                                                                                                                                                                                                               |                                                                                  |                                                                                                                                                                                         |                                                                                     |  |  |  |  |  |  |
|                                                                                                                                                                                                                                                               |                                                                                  |                                                                                                                                                                                         |                                                                                     |  |  |  |  |  |  |
|                                                                                                                                                                                                                                                               |                                                                                  |                                                                                                                                                                                         |                                                                                     |  |  |  |  |  |  |
| <b>13</b>                                                                                                                                                                                                                                                     | Other financial or non-financial interests                                       | <input checked="" type="checkbox"/> <b>None</b><br><table border="1" style="width: 100%;"> <tr><td></td><td></td></tr> <tr><td></td><td></td></tr> <tr><td></td><td></td></tr> </table> |                                                                                     |  |  |  |  |  |  |
|                                                                                                                                                                                                                                                               |                                                                                  |                                                                                                                                                                                         |                                                                                     |  |  |  |  |  |  |
|                                                                                                                                                                                                                                                               |                                                                                  |                                                                                                                                                                                         |                                                                                     |  |  |  |  |  |  |
|                                                                                                                                                                                                                                                               |                                                                                  |                                                                                                                                                                                         |                                                                                     |  |  |  |  |  |  |
| <p><b>Please place an "X" next to the following statement to indicate your agreement:</b></p> <p><input checked="" type="checkbox"/> I certify that I have answered every question and have not altered the wording of any of the questions on this form.</p> |                                                                                  |                                                                                                                                                                                         |                                                                                     |  |  |  |  |  |  |

ICMJE DISCLOSURE FORM

Date:

1/16/2022

Your Name:

Gabor Toth, MD

Manuscript Title:

Prospective Study on Embolization of Intracranial Aneurysms with the Pipeline Device (PREMIER study): 3-year results with the application of a flow diverter-specific occlusion classification

Manuscript Number (if known):

neurintsurg-2021-018501

In the interest of transparency, we ask you to disclose all relationships/activities/interests listed below that are related to the content of your manuscript. “Related” means any relation with for-profit or not-for-profit third parties whose interests may be affected by the content of the manuscript. Disclosure represents a commitment to transparency and does not necessarily indicate a bias. If you are in doubt about whether to list a relationship/activity/interest, it is preferable that you do so.

The author’s relationships/activities/interests should be defined broadly. For example, if your manuscript pertains to the epidemiology of hypertension, you should declare all relationships with manufacturers of antihypertensive medication, even if that medication is not mentioned in the manuscript.

In item #1 below, report all support for the work reported in this manuscript without time limit. For all other items, the time frame for disclosure is the past 36 months.

|                                                    | Name all entities with whom you have this relationship or indicate none (add rows as needed)                                                                                                                                                                                                                                                                                      | Specifications/Comments (e.g., if payments were made to you or to your institution) |  |  |  |  |                                           |  |
|----------------------------------------------------|-----------------------------------------------------------------------------------------------------------------------------------------------------------------------------------------------------------------------------------------------------------------------------------------------------------------------------------------------------------------------------------|-------------------------------------------------------------------------------------|--|--|--|--|-------------------------------------------|--|
| Time frame: Since the initial planning of the work |                                                                                                                                                                                                                                                                                                                                                                                   |                                                                                     |  |  |  |  |                                           |  |
| 1                                                  | <div>All support for the present manuscript (e.g., funding, provision of study materials, medical writing, article processing charges, etc.)<br/>No time limit for this item.</div> <div><input checked="" type="checkbox"/> None</div> <table><tr><td></td><td></td></tr><tr><td></td><td></td></tr><tr><td></td><td>Click the tab key to add additional rows.</td></tr></table> |                                                                                     |  |  |  |  | Click the tab key to add additional rows. |  |
|                                                    |                                                                                                                                                                                                                                                                                                                                                                                   |                                                                                     |  |  |  |  |                                           |  |
|                                                    |                                                                                                                                                                                                                                                                                                                                                                                   |                                                                                     |  |  |  |  |                                           |  |
|                                                    | Click the tab key to add additional rows.                                                                                                                                                                                                                                                                                                                                         |                                                                                     |  |  |  |  |                                           |  |
| Time frame: past 36 months                         |                                                                                                                                                                                                                                                                                                                                                                                   |                                                                                     |  |  |  |  |                                           |  |
| 2                                                  | <div>Grants or contracts from any entity (if not indicated in item #1 above).</div> <div><input checked="" type="checkbox"/> None</div> <table><tr><td></td><td></td></tr><tr><td></td><td></td></tr><tr><td></td><td></td></tr></table>                                                                                                                                          |                                                                                     |  |  |  |  |                                           |  |
|                                                    |                                                                                                                                                                                                                                                                                                                                                                                   |                                                                                     |  |  |  |  |                                           |  |
|                                                    |                                                                                                                                                                                                                                                                                                                                                                                   |                                                                                     |  |  |  |  |                                           |  |
|                                                    |                                                                                                                                                                                                                                                                                                                                                                                   |                                                                                     |  |  |  |  |                                           |  |
| 3                                                  | <div>Royalties or licenses</div> <div><input checked="" type="checkbox"/> None</div> <table><tr><td></td><td></td></tr><tr><td></td><td></td></tr><tr><td></td><td></td></tr></table>                                                                                                                                                                                             |                                                                                     |  |  |  |  |                                           |  |
|                                                    |                                                                                                                                                                                                                                                                                                                                                                                   |                                                                                     |  |  |  |  |                                           |  |
|                                                    |                                                                                                                                                                                                                                                                                                                                                                                   |                                                                                     |  |  |  |  |                                           |  |
|                                                    |                                                                                                                                                                                                                                                                                                                                                                                   |                                                                                     |  |  |  |  |                                           |  |

|              |                                                                                                              | Name all entities with whom you have this relationship or indicate none (add rows as needed)                                                                                                    | Specifications/Comments (e.g., if payments were made to you or to your institution) |  |              |  |  |  |  |  |  |
|--------------|--------------------------------------------------------------------------------------------------------------|-------------------------------------------------------------------------------------------------------------------------------------------------------------------------------------------------|-------------------------------------------------------------------------------------|--|--------------|--|--|--|--|--|--|
| 4            | Consulting fees                                                                                              | <input type="checkbox"/> None<br><table border="1"> <tr><td>Dynamed</td><td></td></tr> <tr><td>Microvention</td><td></td></tr> <tr><td></td><td></td></tr> <tr><td></td><td></td></tr> </table> | Dynamed                                                                             |  | Microvention |  |  |  |  |  |  |
| Dynamed      |                                                                                                              |                                                                                                                                                                                                 |                                                                                     |  |              |  |  |  |  |  |  |
| Microvention |                                                                                                              |                                                                                                                                                                                                 |                                                                                     |  |              |  |  |  |  |  |  |
|              |                                                                                                              |                                                                                                                                                                                                 |                                                                                     |  |              |  |  |  |  |  |  |
|              |                                                                                                              |                                                                                                                                                                                                 |                                                                                     |  |              |  |  |  |  |  |  |
| 5            | Payment or honoraria for lectures, presentations, speakers bureaus, manuscript writing or educational events | <input checked="" type="checkbox"/> None<br><table border="1"> <tr><td></td><td></td></tr> <tr><td></td><td></td></tr> <tr><td></td><td></td></tr> </table>                                     |                                                                                     |  |              |  |  |  |  |  |  |
|              |                                                                                                              |                                                                                                                                                                                                 |                                                                                     |  |              |  |  |  |  |  |  |
|              |                                                                                                              |                                                                                                                                                                                                 |                                                                                     |  |              |  |  |  |  |  |  |
|              |                                                                                                              |                                                                                                                                                                                                 |                                                                                     |  |              |  |  |  |  |  |  |
| 6            | Payment for expert testimony                                                                                 | <input checked="" type="checkbox"/> None<br><table border="1"> <tr><td></td><td></td></tr> <tr><td></td><td></td></tr> <tr><td></td><td></td></tr> </table>                                     |                                                                                     |  |              |  |  |  |  |  |  |
|              |                                                                                                              |                                                                                                                                                                                                 |                                                                                     |  |              |  |  |  |  |  |  |
|              |                                                                                                              |                                                                                                                                                                                                 |                                                                                     |  |              |  |  |  |  |  |  |
|              |                                                                                                              |                                                                                                                                                                                                 |                                                                                     |  |              |  |  |  |  |  |  |
| 7            | Support for attending meetings and/or travel                                                                 | <input checked="" type="checkbox"/> None<br><table border="1"> <tr><td></td><td></td></tr> <tr><td></td><td></td></tr> <tr><td></td><td></td></tr> </table>                                     |                                                                                     |  |              |  |  |  |  |  |  |
|              |                                                                                                              |                                                                                                                                                                                                 |                                                                                     |  |              |  |  |  |  |  |  |
|              |                                                                                                              |                                                                                                                                                                                                 |                                                                                     |  |              |  |  |  |  |  |  |
|              |                                                                                                              |                                                                                                                                                                                                 |                                                                                     |  |              |  |  |  |  |  |  |
| 8            | Patents planned, issued or pending                                                                           | <input checked="" type="checkbox"/> None<br><table border="1"> <tr><td></td><td></td></tr> <tr><td></td><td></td></tr> <tr><td></td><td></td></tr> </table>                                     |                                                                                     |  |              |  |  |  |  |  |  |
|              |                                                                                                              |                                                                                                                                                                                                 |                                                                                     |  |              |  |  |  |  |  |  |
|              |                                                                                                              |                                                                                                                                                                                                 |                                                                                     |  |              |  |  |  |  |  |  |
|              |                                                                                                              |                                                                                                                                                                                                 |                                                                                     |  |              |  |  |  |  |  |  |
| 9            | Participation on a Data Safety Monitoring Board or Advisory Board                                            | <input type="checkbox"/> None<br><table border="1"> <tr><td>Medtronic</td><td></td></tr> <tr><td></td><td></td></tr> <tr><td></td><td></td></tr> </table>                                       | Medtronic                                                                           |  |              |  |  |  |  |  |  |
| Medtronic    |                                                                                                              |                                                                                                                                                                                                 |                                                                                     |  |              |  |  |  |  |  |  |
|              |                                                                                                              |                                                                                                                                                                                                 |                                                                                     |  |              |  |  |  |  |  |  |
|              |                                                                                                              |                                                                                                                                                                                                 |                                                                                     |  |              |  |  |  |  |  |  |
| 10           | Leadership or fiduciary role in other board, society, committee or advocacy group, paid or unpaid            | <input checked="" type="checkbox"/> None<br><table border="1"> <tr><td></td><td></td></tr> <tr><td></td><td></td></tr> <tr><td></td><td></td></tr> </table>                                     |                                                                                     |  |              |  |  |  |  |  |  |
|              |                                                                                                              |                                                                                                                                                                                                 |                                                                                     |  |              |  |  |  |  |  |  |
|              |                                                                                                              |                                                                                                                                                                                                 |                                                                                     |  |              |  |  |  |  |  |  |
|              |                                                                                                              |                                                                                                                                                                                                 |                                                                                     |  |              |  |  |  |  |  |  |

|                                                                                                                                                                                                                                                               |                                                                                  | Name all entities with whom you have this relationship or indicate none (add rows as needed)                                                                                                                                                 | Specifications/Comments (e.g., if payments were made to you or to your institution) |                                                          |  |  |  |  |  |
|---------------------------------------------------------------------------------------------------------------------------------------------------------------------------------------------------------------------------------------------------------------|----------------------------------------------------------------------------------|----------------------------------------------------------------------------------------------------------------------------------------------------------------------------------------------------------------------------------------------|-------------------------------------------------------------------------------------|----------------------------------------------------------|--|--|--|--|--|
| <b>11</b>                                                                                                                                                                                                                                                     | Stock or stock options                                                           | <input checked="" type="checkbox"/> <b>None</b><br><table border="1" style="width: 100%;"> <tr><td> </td><td> </td></tr> <tr><td> </td><td> </td></tr> <tr><td> </td><td> </td></tr> </table>                                                |                                                                                     |                                                          |  |  |  |  |  |
|                                                                                                                                                                                                                                                               |                                                                                  |                                                                                                                                                                                                                                              |                                                                                     |                                                          |  |  |  |  |  |
|                                                                                                                                                                                                                                                               |                                                                                  |                                                                                                                                                                                                                                              |                                                                                     |                                                          |  |  |  |  |  |
|                                                                                                                                                                                                                                                               |                                                                                  |                                                                                                                                                                                                                                              |                                                                                     |                                                          |  |  |  |  |  |
| <b>12</b>                                                                                                                                                                                                                                                     | Receipt of equipment, materials, drugs, medical writing, gifts or other services | <input checked="" type="checkbox"/> <b>None</b><br><table border="1" style="width: 100%;"> <tr><td> </td><td> </td></tr> <tr><td> </td><td> </td></tr> <tr><td> </td><td> </td></tr> </table>                                                |                                                                                     |                                                          |  |  |  |  |  |
|                                                                                                                                                                                                                                                               |                                                                                  |                                                                                                                                                                                                                                              |                                                                                     |                                                          |  |  |  |  |  |
|                                                                                                                                                                                                                                                               |                                                                                  |                                                                                                                                                                                                                                              |                                                                                     |                                                          |  |  |  |  |  |
|                                                                                                                                                                                                                                                               |                                                                                  |                                                                                                                                                                                                                                              |                                                                                     |                                                          |  |  |  |  |  |
| <b>13</b>                                                                                                                                                                                                                                                     | Other financial or non-financial interests                                       | <input type="checkbox"/> <b>None</b><br><table border="1" style="width: 100%;"> <tr> <td>Associate Editor, Journal of Neurointerventional Surgery</td> <td> </td> </tr> <tr><td> </td><td> </td></tr> <tr><td> </td><td> </td></tr> </table> |                                                                                     | Associate Editor, Journal of Neurointerventional Surgery |  |  |  |  |  |
| Associate Editor, Journal of Neurointerventional Surgery                                                                                                                                                                                                      |                                                                                  |                                                                                                                                                                                                                                              |                                                                                     |                                                          |  |  |  |  |  |
|                                                                                                                                                                                                                                                               |                                                                                  |                                                                                                                                                                                                                                              |                                                                                     |                                                          |  |  |  |  |  |
|                                                                                                                                                                                                                                                               |                                                                                  |                                                                                                                                                                                                                                              |                                                                                     |                                                          |  |  |  |  |  |
| <p><b>Please place an "X" next to the following statement to indicate your agreement:</b></p> <p><input checked="" type="checkbox"/> I certify that I have answered every question and have not altered the wording of any of the questions on this form.</p> |                                                                                  |                                                                                                                                                                                                                                              |                                                                                     |                                                          |  |  |  |  |  |



## ICMJE DISCLOSURE FORM

**Date:** 1/13/2022

**Your Name:** Geoffrey P. Colby, MD, PhD

**Manuscript Title:** Prospective Study on Embolization of Intracranial Aneurysms with the Pipeline Device (PREMIER study): 3-year results with the application of a flow diverter-specific occlusion classification

**Manuscript Number (if known):** neurintsurg-2021-018501

In the interest of transparency, we ask you to disclose all relationships/activities/interests listed below that are related to the content of your manuscript. "Related" means any relation with for-profit or not-for-profit third parties whose interests may be affected by the content of the manuscript. Disclosure represents a commitment to transparency and does not necessarily indicate a bias. If you are in doubt about whether to list a relationship/activity/interest, it is preferable that you do so.

The author's relationships/activities/interests should be defined broadly. For example, if your manuscript pertains to the epidemiology of hypertension, you should declare all relationships with manufacturers of antihypertensive medication, even if that medication is not mentioned in the manuscript.

In item #1 below, report all support for the work reported in this manuscript without time limit. For all other items, the time frame for disclosure is the past 36 months.

|                                                    |                                                                                                                                                                                | Name all entities with whom you have this relationship or indicate none (add rows as needed)                                                                                                                                                                                                                                                                                 | Specifications/Comments (e.g., if payments were made to you or to your institution) |           |  |         |  |  |  |
|----------------------------------------------------|--------------------------------------------------------------------------------------------------------------------------------------------------------------------------------|------------------------------------------------------------------------------------------------------------------------------------------------------------------------------------------------------------------------------------------------------------------------------------------------------------------------------------------------------------------------------|-------------------------------------------------------------------------------------|-----------|--|---------|--|--|--|
| Time frame: Since the initial planning of the work |                                                                                                                                                                                |                                                                                                                                                                                                                                                                                                                                                                              |                                                                                     |           |  |         |  |  |  |
| 1                                                  | All support for the present manuscript (e.g., funding, provision of study materials, medical writing, article processing charges, etc.)<br><b>No time limit for this item.</b> | <input checked="" type="checkbox"/> <b>None</b><br><table border="1" style="width: 100%; border-collapse: collapse; margin-top: 5px;"> <tr><td style="height: 20px;"></td><td style="height: 20px;"></td></tr> <tr><td style="height: 20px;"></td><td style="height: 20px;"></td></tr> <tr><td style="height: 20px;"></td><td style="height: 20px;"></td></tr> </table>      |                                                                                     |           |  |         |  |  |  |
|                                                    |                                                                                                                                                                                |                                                                                                                                                                                                                                                                                                                                                                              |                                                                                     |           |  |         |  |  |  |
|                                                    |                                                                                                                                                                                |                                                                                                                                                                                                                                                                                                                                                                              |                                                                                     |           |  |         |  |  |  |
|                                                    |                                                                                                                                                                                |                                                                                                                                                                                                                                                                                                                                                                              |                                                                                     |           |  |         |  |  |  |
| Time frame: past 36 months                         |                                                                                                                                                                                |                                                                                                                                                                                                                                                                                                                                                                              |                                                                                     |           |  |         |  |  |  |
| 2                                                  | Grants or contracts from any entity (if not indicated in item #1 above).                                                                                                       | <input type="checkbox"/> <b>None</b><br><table border="1" style="width: 100%; border-collapse: collapse; margin-top: 5px;"> <tr><td style="height: 20px;">Medtronic</td><td style="height: 20px;"></td></tr> <tr><td style="height: 20px;">Stryker</td><td style="height: 20px;"></td></tr> <tr><td style="height: 20px;"></td><td style="height: 20px;"></td></tr> </table> |                                                                                     | Medtronic |  | Stryker |  |  |  |
| Medtronic                                          |                                                                                                                                                                                |                                                                                                                                                                                                                                                                                                                                                                              |                                                                                     |           |  |         |  |  |  |
| Stryker                                            |                                                                                                                                                                                |                                                                                                                                                                                                                                                                                                                                                                              |                                                                                     |           |  |         |  |  |  |
|                                                    |                                                                                                                                                                                |                                                                                                                                                                                                                                                                                                                                                                              |                                                                                     |           |  |         |  |  |  |
| 3                                                  | Royalties or licenses                                                                                                                                                          | <input checked="" type="checkbox"/> <b>None</b><br><table border="1" style="width: 100%; border-collapse: collapse; margin-top: 5px;"> <tr><td style="height: 20px;"></td><td style="height: 20px;"></td></tr> <tr><td style="height: 20px;"></td><td style="height: 20px;"></td></tr> <tr><td style="height: 20px;"></td><td style="height: 20px;"></td></tr> </table>      |                                                                                     |           |  |         |  |  |  |
|                                                    |                                                                                                                                                                                |                                                                                                                                                                                                                                                                                                                                                                              |                                                                                     |           |  |         |  |  |  |
|                                                    |                                                                                                                                                                                |                                                                                                                                                                                                                                                                                                                                                                              |                                                                                     |           |  |         |  |  |  |
|                                                    |                                                                                                                                                                                |                                                                                                                                                                                                                                                                                                                                                                              |                                                                                     |           |  |         |  |  |  |

|              |                                                                                                              | Name all entities with whom you have this relationship or indicate none (add rows as needed)                                                                                                             | Specifications/Comments (e.g., if payments were made to you or to your institution) |  |         |  |              |  |  |  |  |
|--------------|--------------------------------------------------------------------------------------------------------------|----------------------------------------------------------------------------------------------------------------------------------------------------------------------------------------------------------|-------------------------------------------------------------------------------------|--|---------|--|--------------|--|--|--|--|
| 4            | Consulting fees                                                                                              | <input type="checkbox"/> None<br><table border="1"> <tr><td>Medtronic</td><td></td></tr> <tr><td>Stryker</td><td></td></tr> <tr><td>MicroVention</td><td></td></tr> <tr><td></td><td></td></tr> </table> | Medtronic                                                                           |  | Stryker |  | MicroVention |  |  |  |  |
| Medtronic    |                                                                                                              |                                                                                                                                                                                                          |                                                                                     |  |         |  |              |  |  |  |  |
| Stryker      |                                                                                                              |                                                                                                                                                                                                          |                                                                                     |  |         |  |              |  |  |  |  |
| MicroVention |                                                                                                              |                                                                                                                                                                                                          |                                                                                     |  |         |  |              |  |  |  |  |
|              |                                                                                                              |                                                                                                                                                                                                          |                                                                                     |  |         |  |              |  |  |  |  |
| 5            | Payment or honoraria for lectures, presentations, speakers bureaus, manuscript writing or educational events | <input checked="" type="checkbox"/> None<br><table border="1"> <tr><td></td><td></td></tr> <tr><td></td><td></td></tr> <tr><td></td><td></td></tr> </table>                                              |                                                                                     |  |         |  |              |  |  |  |  |
|              |                                                                                                              |                                                                                                                                                                                                          |                                                                                     |  |         |  |              |  |  |  |  |
|              |                                                                                                              |                                                                                                                                                                                                          |                                                                                     |  |         |  |              |  |  |  |  |
|              |                                                                                                              |                                                                                                                                                                                                          |                                                                                     |  |         |  |              |  |  |  |  |
| 6            | Payment for expert testimony                                                                                 | <input checked="" type="checkbox"/> None<br><table border="1"> <tr><td></td><td></td></tr> <tr><td></td><td></td></tr> <tr><td></td><td></td></tr> </table>                                              |                                                                                     |  |         |  |              |  |  |  |  |
|              |                                                                                                              |                                                                                                                                                                                                          |                                                                                     |  |         |  |              |  |  |  |  |
|              |                                                                                                              |                                                                                                                                                                                                          |                                                                                     |  |         |  |              |  |  |  |  |
|              |                                                                                                              |                                                                                                                                                                                                          |                                                                                     |  |         |  |              |  |  |  |  |
| 7            | Support for attending meetings and/or travel                                                                 | <input checked="" type="checkbox"/> None<br><table border="1"> <tr><td></td><td></td></tr> <tr><td></td><td></td></tr> <tr><td></td><td></td></tr> </table>                                              |                                                                                     |  |         |  |              |  |  |  |  |
|              |                                                                                                              |                                                                                                                                                                                                          |                                                                                     |  |         |  |              |  |  |  |  |
|              |                                                                                                              |                                                                                                                                                                                                          |                                                                                     |  |         |  |              |  |  |  |  |
|              |                                                                                                              |                                                                                                                                                                                                          |                                                                                     |  |         |  |              |  |  |  |  |
| 8            | Patents planned, issued or pending                                                                           | <input checked="" type="checkbox"/> None<br><table border="1"> <tr><td></td><td></td></tr> <tr><td></td><td></td></tr> <tr><td></td><td></td></tr> </table>                                              |                                                                                     |  |         |  |              |  |  |  |  |
|              |                                                                                                              |                                                                                                                                                                                                          |                                                                                     |  |         |  |              |  |  |  |  |
|              |                                                                                                              |                                                                                                                                                                                                          |                                                                                     |  |         |  |              |  |  |  |  |
|              |                                                                                                              |                                                                                                                                                                                                          |                                                                                     |  |         |  |              |  |  |  |  |
| 9            | Participation on a Data Safety Monitoring Board or Advisory Board                                            | <input checked="" type="checkbox"/> None<br><table border="1"> <tr><td></td><td></td></tr> <tr><td></td><td></td></tr> <tr><td></td><td></td></tr> </table>                                              |                                                                                     |  |         |  |              |  |  |  |  |
|              |                                                                                                              |                                                                                                                                                                                                          |                                                                                     |  |         |  |              |  |  |  |  |
|              |                                                                                                              |                                                                                                                                                                                                          |                                                                                     |  |         |  |              |  |  |  |  |
|              |                                                                                                              |                                                                                                                                                                                                          |                                                                                     |  |         |  |              |  |  |  |  |
| 10           | Leadership or fiduciary role in other board, society, committee or advocacy group, paid or unpaid            | <input checked="" type="checkbox"/> None<br><table border="1"> <tr><td></td><td></td></tr> <tr><td></td><td></td></tr> <tr><td></td><td></td></tr> </table>                                              |                                                                                     |  |         |  |              |  |  |  |  |
|              |                                                                                                              |                                                                                                                                                                                                          |                                                                                     |  |         |  |              |  |  |  |  |
|              |                                                                                                              |                                                                                                                                                                                                          |                                                                                     |  |         |  |              |  |  |  |  |
|              |                                                                                                              |                                                                                                                                                                                                          |                                                                                     |  |         |  |              |  |  |  |  |

|                                                                                                                                                                                                                                                               |                                                                                  | Name all entities with whom you have this relationship or indicate none (add rows as needed) | Specifications/Comments (e.g., if payments were made to you or to your institution) |
|---------------------------------------------------------------------------------------------------------------------------------------------------------------------------------------------------------------------------------------------------------------|----------------------------------------------------------------------------------|----------------------------------------------------------------------------------------------|-------------------------------------------------------------------------------------|
| <b>11</b>                                                                                                                                                                                                                                                     | Stock or stock options                                                           | <input checked="" type="checkbox"/> <b>None</b>                                              |                                                                                     |
|                                                                                                                                                                                                                                                               |                                                                                  |                                                                                              |                                                                                     |
|                                                                                                                                                                                                                                                               |                                                                                  |                                                                                              |                                                                                     |
|                                                                                                                                                                                                                                                               |                                                                                  |                                                                                              |                                                                                     |
| <b>12</b>                                                                                                                                                                                                                                                     | Receipt of equipment, materials, drugs, medical writing, gifts or other services | <input checked="" type="checkbox"/> <b>None</b>                                              |                                                                                     |
|                                                                                                                                                                                                                                                               |                                                                                  |                                                                                              |                                                                                     |
|                                                                                                                                                                                                                                                               |                                                                                  |                                                                                              |                                                                                     |
|                                                                                                                                                                                                                                                               |                                                                                  |                                                                                              |                                                                                     |
| <b>13</b>                                                                                                                                                                                                                                                     | Other financial or non-financial interests                                       | <input checked="" type="checkbox"/> <b>None</b>                                              |                                                                                     |
|                                                                                                                                                                                                                                                               |                                                                                  |                                                                                              |                                                                                     |
|                                                                                                                                                                                                                                                               |                                                                                  |                                                                                              |                                                                                     |
|                                                                                                                                                                                                                                                               |                                                                                  |                                                                                              |                                                                                     |
| <p><b>Please place an "X" next to the following statement to indicate your agreement:</b></p> <p><input checked="" type="checkbox"/> I certify that I have answered every question and have not altered the wording of any of the questions on this form.</p> |                                                                                  |                                                                                              |                                                                                     |

## ICMJE DISCLOSURE FORM

**Date:** 1/26/2022

**Your Name:** Gustavo M Cortez, MD

**Manuscript Title:** Prospective Study on Embolization of Intracranial Aneurysms with the Pipeline Device (PREMIER study): 3-year results with the application of a flow diverter-specific occlusion classification

**Manuscript Number (if known):** neurintsurg-2021-018501

In the interest of transparency, we ask you to disclose all relationships/activities/interests listed below that are related to the content of your manuscript. "Related" means any relation with for-profit or not-for-profit third parties whose interests may be affected by the content of the manuscript. Disclosure represents a commitment to transparency and does not necessarily indicate a bias. If you are in doubt about whether to list a relationship/activity/interest, it is preferable that you do so.

The author's relationships/activities/interests should be defined broadly. For example, if your manuscript pertains to the epidemiology of hypertension, you should declare all relationships with manufacturers of antihypertensive medication, even if that medication is not mentioned in the manuscript.

In item #1 below, report all support for the work reported in this manuscript without time limit. For all other items, the time frame for disclosure is the past 36 months.

|                                                    |                                                                                                                                                                                | Name all entities with whom you have this relationship or indicate none (add rows as needed)                                                                                                                                                                                                                                                                             | Specifications/Comments (e.g., if payments were made to you or to your institution) |  |  |  |  |  |  |
|----------------------------------------------------|--------------------------------------------------------------------------------------------------------------------------------------------------------------------------------|--------------------------------------------------------------------------------------------------------------------------------------------------------------------------------------------------------------------------------------------------------------------------------------------------------------------------------------------------------------------------|-------------------------------------------------------------------------------------|--|--|--|--|--|--|
| Time frame: Since the initial planning of the work |                                                                                                                                                                                |                                                                                                                                                                                                                                                                                                                                                                          |                                                                                     |  |  |  |  |  |  |
| 1                                                  | All support for the present manuscript (e.g., funding, provision of study materials, medical writing, article processing charges, etc.)<br><b>No time limit for this item.</b> | <input checked="" type="checkbox"/> <b>None</b><br><table border="1" style="width: 100%; border-collapse: collapse; margin-top: 10px;"> <tr><td style="height: 20px;"></td><td style="height: 20px;"></td></tr> <tr><td style="height: 20px;"></td><td style="height: 20px;"></td></tr> <tr><td style="height: 20px;"></td><td style="height: 20px;"></td></tr> </table> |                                                                                     |  |  |  |  |  |  |
|                                                    |                                                                                                                                                                                |                                                                                                                                                                                                                                                                                                                                                                          |                                                                                     |  |  |  |  |  |  |
|                                                    |                                                                                                                                                                                |                                                                                                                                                                                                                                                                                                                                                                          |                                                                                     |  |  |  |  |  |  |
|                                                    |                                                                                                                                                                                |                                                                                                                                                                                                                                                                                                                                                                          |                                                                                     |  |  |  |  |  |  |
| Time frame: past 36 months                         |                                                                                                                                                                                |                                                                                                                                                                                                                                                                                                                                                                          |                                                                                     |  |  |  |  |  |  |
| 2                                                  | Grants or contracts from any entity (if not indicated in item #1 above).                                                                                                       | <input checked="" type="checkbox"/> <b>None</b><br><table border="1" style="width: 100%; border-collapse: collapse; margin-top: 10px;"> <tr><td style="height: 20px;"></td><td style="height: 20px;"></td></tr> <tr><td style="height: 20px;"></td><td style="height: 20px;"></td></tr> <tr><td style="height: 20px;"></td><td style="height: 20px;"></td></tr> </table> |                                                                                     |  |  |  |  |  |  |
|                                                    |                                                                                                                                                                                |                                                                                                                                                                                                                                                                                                                                                                          |                                                                                     |  |  |  |  |  |  |
|                                                    |                                                                                                                                                                                |                                                                                                                                                                                                                                                                                                                                                                          |                                                                                     |  |  |  |  |  |  |
|                                                    |                                                                                                                                                                                |                                                                                                                                                                                                                                                                                                                                                                          |                                                                                     |  |  |  |  |  |  |
| 3                                                  | Royalties or licenses                                                                                                                                                          | <input checked="" type="checkbox"/> <b>None</b><br><table border="1" style="width: 100%; border-collapse: collapse; margin-top: 10px;"> <tr><td style="height: 20px;"></td><td style="height: 20px;"></td></tr> <tr><td style="height: 20px;"></td><td style="height: 20px;"></td></tr> <tr><td style="height: 20px;"></td><td style="height: 20px;"></td></tr> </table> |                                                                                     |  |  |  |  |  |  |
|                                                    |                                                                                                                                                                                |                                                                                                                                                                                                                                                                                                                                                                          |                                                                                     |  |  |  |  |  |  |
|                                                    |                                                                                                                                                                                |                                                                                                                                                                                                                                                                                                                                                                          |                                                                                     |  |  |  |  |  |  |
|                                                    |                                                                                                                                                                                |                                                                                                                                                                                                                                                                                                                                                                          |                                                                                     |  |  |  |  |  |  |

|    |                                                                                                              | Name all entities with whom you have this relationship or indicate none (add rows as needed)                                                                                                   | Specifications/Comments (e.g., if payments were made to you or to your institution) |  |  |  |  |  |  |  |  |
|----|--------------------------------------------------------------------------------------------------------------|------------------------------------------------------------------------------------------------------------------------------------------------------------------------------------------------|-------------------------------------------------------------------------------------|--|--|--|--|--|--|--|--|
| 4  | Consulting fees                                                                                              | <input checked="" type="checkbox"/> <b>None</b><br><table border="1"> <tr><td></td><td></td></tr> <tr><td></td><td></td></tr> <tr><td></td><td></td></tr> <tr><td></td><td></td></tr> </table> |                                                                                     |  |  |  |  |  |  |  |  |
|    |                                                                                                              |                                                                                                                                                                                                |                                                                                     |  |  |  |  |  |  |  |  |
|    |                                                                                                              |                                                                                                                                                                                                |                                                                                     |  |  |  |  |  |  |  |  |
|    |                                                                                                              |                                                                                                                                                                                                |                                                                                     |  |  |  |  |  |  |  |  |
|    |                                                                                                              |                                                                                                                                                                                                |                                                                                     |  |  |  |  |  |  |  |  |
| 5  | Payment or honoraria for lectures, presentations, speakers bureaus, manuscript writing or educational events | <input checked="" type="checkbox"/> <b>None</b><br><table border="1"> <tr><td></td><td></td></tr> <tr><td></td><td></td></tr> <tr><td></td><td></td></tr> </table>                             |                                                                                     |  |  |  |  |  |  |  |  |
|    |                                                                                                              |                                                                                                                                                                                                |                                                                                     |  |  |  |  |  |  |  |  |
|    |                                                                                                              |                                                                                                                                                                                                |                                                                                     |  |  |  |  |  |  |  |  |
|    |                                                                                                              |                                                                                                                                                                                                |                                                                                     |  |  |  |  |  |  |  |  |
| 6  | Payment for expert testimony                                                                                 | <input checked="" type="checkbox"/> <b>None</b><br><table border="1"> <tr><td></td><td></td></tr> <tr><td></td><td></td></tr> <tr><td></td><td></td></tr> </table>                             |                                                                                     |  |  |  |  |  |  |  |  |
|    |                                                                                                              |                                                                                                                                                                                                |                                                                                     |  |  |  |  |  |  |  |  |
|    |                                                                                                              |                                                                                                                                                                                                |                                                                                     |  |  |  |  |  |  |  |  |
|    |                                                                                                              |                                                                                                                                                                                                |                                                                                     |  |  |  |  |  |  |  |  |
| 7  | Support for attending meetings and/or travel                                                                 | <input checked="" type="checkbox"/> <b>None</b><br><table border="1"> <tr><td></td><td></td></tr> <tr><td></td><td></td></tr> <tr><td></td><td></td></tr> </table>                             |                                                                                     |  |  |  |  |  |  |  |  |
|    |                                                                                                              |                                                                                                                                                                                                |                                                                                     |  |  |  |  |  |  |  |  |
|    |                                                                                                              |                                                                                                                                                                                                |                                                                                     |  |  |  |  |  |  |  |  |
|    |                                                                                                              |                                                                                                                                                                                                |                                                                                     |  |  |  |  |  |  |  |  |
| 8  | Patents planned, issued or pending                                                                           | <input checked="" type="checkbox"/> <b>None</b><br><table border="1"> <tr><td></td><td></td></tr> <tr><td></td><td></td></tr> <tr><td></td><td></td></tr> </table>                             |                                                                                     |  |  |  |  |  |  |  |  |
|    |                                                                                                              |                                                                                                                                                                                                |                                                                                     |  |  |  |  |  |  |  |  |
|    |                                                                                                              |                                                                                                                                                                                                |                                                                                     |  |  |  |  |  |  |  |  |
|    |                                                                                                              |                                                                                                                                                                                                |                                                                                     |  |  |  |  |  |  |  |  |
| 9  | Participation on a Data Safety Monitoring Board or Advisory Board                                            | <input checked="" type="checkbox"/> <b>None</b><br><table border="1"> <tr><td></td><td></td></tr> <tr><td></td><td></td></tr> <tr><td></td><td></td></tr> </table>                             |                                                                                     |  |  |  |  |  |  |  |  |
|    |                                                                                                              |                                                                                                                                                                                                |                                                                                     |  |  |  |  |  |  |  |  |
|    |                                                                                                              |                                                                                                                                                                                                |                                                                                     |  |  |  |  |  |  |  |  |
|    |                                                                                                              |                                                                                                                                                                                                |                                                                                     |  |  |  |  |  |  |  |  |
| 10 | Leadership or fiduciary role in other board, society, committee or advocacy group, paid or unpaid            | <input checked="" type="checkbox"/> <b>None</b><br><table border="1"> <tr><td></td><td></td></tr> <tr><td></td><td></td></tr> <tr><td></td><td></td></tr> </table>                             |                                                                                     |  |  |  |  |  |  |  |  |
|    |                                                                                                              |                                                                                                                                                                                                |                                                                                     |  |  |  |  |  |  |  |  |
|    |                                                                                                              |                                                                                                                                                                                                |                                                                                     |  |  |  |  |  |  |  |  |
|    |                                                                                                              |                                                                                                                                                                                                |                                                                                     |  |  |  |  |  |  |  |  |

|           |                                                                                  | Name all entities with whom you have this relationship or indicate none (add rows as needed)                                                                       | Specifications/Comments (e.g., if payments were made to you or to your institution) |  |  |  |  |  |  |
|-----------|----------------------------------------------------------------------------------|--------------------------------------------------------------------------------------------------------------------------------------------------------------------|-------------------------------------------------------------------------------------|--|--|--|--|--|--|
| <b>11</b> | Stock or stock options                                                           | <input checked="" type="checkbox"/> <b>None</b><br><table border="1"> <tr><td></td><td></td></tr> <tr><td></td><td></td></tr> <tr><td></td><td></td></tr> </table> |                                                                                     |  |  |  |  |  |  |
|           |                                                                                  |                                                                                                                                                                    |                                                                                     |  |  |  |  |  |  |
|           |                                                                                  |                                                                                                                                                                    |                                                                                     |  |  |  |  |  |  |
|           |                                                                                  |                                                                                                                                                                    |                                                                                     |  |  |  |  |  |  |
| <b>12</b> | Receipt of equipment, materials, drugs, medical writing, gifts or other services | <input checked="" type="checkbox"/> <b>None</b><br><table border="1"> <tr><td></td><td></td></tr> <tr><td></td><td></td></tr> <tr><td></td><td></td></tr> </table> |                                                                                     |  |  |  |  |  |  |
|           |                                                                                  |                                                                                                                                                                    |                                                                                     |  |  |  |  |  |  |
|           |                                                                                  |                                                                                                                                                                    |                                                                                     |  |  |  |  |  |  |
|           |                                                                                  |                                                                                                                                                                    |                                                                                     |  |  |  |  |  |  |
| <b>13</b> | Other financial or non-financial interests                                       | <input checked="" type="checkbox"/> <b>None</b><br><table border="1"> <tr><td></td><td></td></tr> <tr><td></td><td></td></tr> <tr><td></td><td></td></tr> </table> |                                                                                     |  |  |  |  |  |  |
|           |                                                                                  |                                                                                                                                                                    |                                                                                     |  |  |  |  |  |  |
|           |                                                                                  |                                                                                                                                                                    |                                                                                     |  |  |  |  |  |  |
|           |                                                                                  |                                                                                                                                                                    |                                                                                     |  |  |  |  |  |  |

**Please place an "X" next to the following statement to indicate your agreement:**

☒ I certify that I have answered every question and have not altered the wording of any of the questions on this form.

## ICMJE DISCLOSURE FORM

**Date:** 1/28/2022

**Your Name:** Istvan Szikora

**Manuscript Title:** Prospective Study on Embolization of Intracranial Aneurysms with the Pipeline Device (PREMIER study): 3-year results with the application of a flow diverter-specific occlusion classification

**Manuscript Number (if known):** neurintsurg-2021-018501

In the interest of transparency, we ask you to disclose all relationships/activities/interests listed below that are related to the content of your manuscript. "Related" means any relation with for-profit or not-for-profit third parties whose interests may be affected by the content of the manuscript. Disclosure represents a commitment to transparency and does not necessarily indicate a bias. If you are in doubt about whether to list a relationship/activity/interest, it is preferable that you do so.

The author's relationships/activities/interests should be defined broadly. For example, if your manuscript pertains to the epidemiology of hypertension, you should declare all relationships with manufacturers of antihypertensive medication, even if that medication is not mentioned in the manuscript.

In item #1 below, report all support for the work reported in this manuscript without time limit. For all other items, the time frame for disclosure is the past 36 months.

|                                                           | Name all entities with whom you have this relationship or indicate none (add rows as needed)                                                                                   | Specifications/Comments (e.g., if payments were made to you or to your institution)                                                                                                                          |  |  |  |  |  |  |
|-----------------------------------------------------------|--------------------------------------------------------------------------------------------------------------------------------------------------------------------------------|--------------------------------------------------------------------------------------------------------------------------------------------------------------------------------------------------------------|--|--|--|--|--|--|
| <b>Time frame: Since the initial planning of the work</b> |                                                                                                                                                                                |                                                                                                                                                                                                              |  |  |  |  |  |  |
| <b>1</b>                                                  | All support for the present manuscript (e.g., funding, provision of study materials, medical writing, article processing charges, etc.)<br><b>No time limit for this item.</b> | <input checked="" type="checkbox"/> <b>None</b><br><table border="1"> <tr><td></td><td></td></tr> <tr><td></td><td></td></tr> <tr><td></td><td></td></tr> </table> Click the tab key to add additional rows. |  |  |  |  |  |  |
|                                                           |                                                                                                                                                                                |                                                                                                                                                                                                              |  |  |  |  |  |  |
|                                                           |                                                                                                                                                                                |                                                                                                                                                                                                              |  |  |  |  |  |  |
|                                                           |                                                                                                                                                                                |                                                                                                                                                                                                              |  |  |  |  |  |  |
| <b>Time frame: past 36 months</b>                         |                                                                                                                                                                                |                                                                                                                                                                                                              |  |  |  |  |  |  |
| <b>2</b>                                                  | Grants or contracts from any entity (if not indicated in item #1 above).                                                                                                       | <input checked="" type="checkbox"/> <b>None</b><br><table border="1"> <tr><td></td><td></td></tr> <tr><td></td><td></td></tr> <tr><td></td><td></td></tr> </table>                                           |  |  |  |  |  |  |
|                                                           |                                                                                                                                                                                |                                                                                                                                                                                                              |  |  |  |  |  |  |
|                                                           |                                                                                                                                                                                |                                                                                                                                                                                                              |  |  |  |  |  |  |
|                                                           |                                                                                                                                                                                |                                                                                                                                                                                                              |  |  |  |  |  |  |
| <b>3</b>                                                  | Royalties or licenses                                                                                                                                                          | <input checked="" type="checkbox"/> <b>None</b><br><table border="1"> <tr><td></td><td></td></tr> <tr><td></td><td></td></tr> <tr><td></td><td></td></tr> </table>                                           |  |  |  |  |  |  |
|                                                           |                                                                                                                                                                                |                                                                                                                                                                                                              |  |  |  |  |  |  |
|                                                           |                                                                                                                                                                                |                                                                                                                                                                                                              |  |  |  |  |  |  |
|                                                           |                                                                                                                                                                                |                                                                                                                                                                                                              |  |  |  |  |  |  |

|           |                                                                                                              | Name all entities with whom you have this relationship or indicate none (add rows as needed)                                                                                                                | Specifications/Comments (e.g., if payments were made to you or to your institution) |            |  |  |  |  |  |  |  |
|-----------|--------------------------------------------------------------------------------------------------------------|-------------------------------------------------------------------------------------------------------------------------------------------------------------------------------------------------------------|-------------------------------------------------------------------------------------|------------|--|--|--|--|--|--|--|
| 4         | Consulting fees                                                                                              | <input type="checkbox"/> None<br><table border="1"> <tr> <td>Medtronic</td> <td>Consultant</td> </tr> <tr> <td></td> <td></td> </tr> <tr> <td></td> <td></td> </tr> <tr> <td></td> <td></td> </tr> </table> | Medtronic                                                                           | Consultant |  |  |  |  |  |  |  |
| Medtronic | Consultant                                                                                                   |                                                                                                                                                                                                             |                                                                                     |            |  |  |  |  |  |  |  |
|           |                                                                                                              |                                                                                                                                                                                                             |                                                                                     |            |  |  |  |  |  |  |  |
|           |                                                                                                              |                                                                                                                                                                                                             |                                                                                     |            |  |  |  |  |  |  |  |
|           |                                                                                                              |                                                                                                                                                                                                             |                                                                                     |            |  |  |  |  |  |  |  |
| 5         | Payment or honoraria for lectures, presentations, speakers bureaus, manuscript writing or educational events | <input checked="" type="checkbox"/> None<br><table border="1"> <tr> <td></td> <td></td> </tr> <tr> <td></td> <td></td> </tr> <tr> <td></td> <td></td> </tr> </table>                                        |                                                                                     |            |  |  |  |  |  |  |  |
|           |                                                                                                              |                                                                                                                                                                                                             |                                                                                     |            |  |  |  |  |  |  |  |
|           |                                                                                                              |                                                                                                                                                                                                             |                                                                                     |            |  |  |  |  |  |  |  |
|           |                                                                                                              |                                                                                                                                                                                                             |                                                                                     |            |  |  |  |  |  |  |  |
| 6         | Payment for expert testimony                                                                                 | <input checked="" type="checkbox"/> None<br><table border="1"> <tr> <td></td> <td></td> </tr> <tr> <td></td> <td></td> </tr> <tr> <td></td> <td></td> </tr> </table>                                        |                                                                                     |            |  |  |  |  |  |  |  |
|           |                                                                                                              |                                                                                                                                                                                                             |                                                                                     |            |  |  |  |  |  |  |  |
|           |                                                                                                              |                                                                                                                                                                                                             |                                                                                     |            |  |  |  |  |  |  |  |
|           |                                                                                                              |                                                                                                                                                                                                             |                                                                                     |            |  |  |  |  |  |  |  |
| 7         | Support for attending meetings and/or travel                                                                 | <input checked="" type="checkbox"/> None<br><table border="1"> <tr> <td></td> <td></td> </tr> <tr> <td></td> <td></td> </tr> <tr> <td></td> <td></td> </tr> </table>                                        |                                                                                     |            |  |  |  |  |  |  |  |
|           |                                                                                                              |                                                                                                                                                                                                             |                                                                                     |            |  |  |  |  |  |  |  |
|           |                                                                                                              |                                                                                                                                                                                                             |                                                                                     |            |  |  |  |  |  |  |  |
|           |                                                                                                              |                                                                                                                                                                                                             |                                                                                     |            |  |  |  |  |  |  |  |
| 8         | Patents planned, issued or pending                                                                           | <input checked="" type="checkbox"/> None<br><table border="1"> <tr> <td></td> <td></td> </tr> <tr> <td></td> <td></td> </tr> <tr> <td></td> <td></td> </tr> </table>                                        |                                                                                     |            |  |  |  |  |  |  |  |
|           |                                                                                                              |                                                                                                                                                                                                             |                                                                                     |            |  |  |  |  |  |  |  |
|           |                                                                                                              |                                                                                                                                                                                                             |                                                                                     |            |  |  |  |  |  |  |  |
|           |                                                                                                              |                                                                                                                                                                                                             |                                                                                     |            |  |  |  |  |  |  |  |
| 9         | Participation on a Data Safety Monitoring Board or Advisory Board                                            | <input checked="" type="checkbox"/> None<br><table border="1"> <tr> <td></td> <td></td> </tr> <tr> <td></td> <td></td> </tr> <tr> <td></td> <td></td> </tr> </table>                                        |                                                                                     |            |  |  |  |  |  |  |  |
|           |                                                                                                              |                                                                                                                                                                                                             |                                                                                     |            |  |  |  |  |  |  |  |
|           |                                                                                                              |                                                                                                                                                                                                             |                                                                                     |            |  |  |  |  |  |  |  |
|           |                                                                                                              |                                                                                                                                                                                                             |                                                                                     |            |  |  |  |  |  |  |  |
| 10        | Leadership or fiduciary role in other board, society, committee or advocacy group, paid or unpaid            | <input checked="" type="checkbox"/> None<br><table border="1"> <tr> <td></td> <td></td> </tr> <tr> <td></td> <td></td> </tr> <tr> <td></td> <td></td> </tr> </table>                                        |                                                                                     |            |  |  |  |  |  |  |  |
|           |                                                                                                              |                                                                                                                                                                                                             |                                                                                     |            |  |  |  |  |  |  |  |
|           |                                                                                                              |                                                                                                                                                                                                             |                                                                                     |            |  |  |  |  |  |  |  |
|           |                                                                                                              |                                                                                                                                                                                                             |                                                                                     |            |  |  |  |  |  |  |  |



|                                                                                                                                                                                                                                                               |                                                                                  | Name all entities with whom you have this relationship or indicate none (add rows as needed)                                                                       | Specifications/Comments (e.g., if payments were made to you or to your institution) |  |  |  |  |  |  |
|---------------------------------------------------------------------------------------------------------------------------------------------------------------------------------------------------------------------------------------------------------------|----------------------------------------------------------------------------------|--------------------------------------------------------------------------------------------------------------------------------------------------------------------|-------------------------------------------------------------------------------------|--|--|--|--|--|--|
| <b>11</b>                                                                                                                                                                                                                                                     | Stock or stock options                                                           | <input checked="" type="checkbox"/> <b>None</b><br><table border="1"> <tr><td></td><td></td></tr> <tr><td></td><td></td></tr> <tr><td></td><td></td></tr> </table> |                                                                                     |  |  |  |  |  |  |
|                                                                                                                                                                                                                                                               |                                                                                  |                                                                                                                                                                    |                                                                                     |  |  |  |  |  |  |
|                                                                                                                                                                                                                                                               |                                                                                  |                                                                                                                                                                    |                                                                                     |  |  |  |  |  |  |
|                                                                                                                                                                                                                                                               |                                                                                  |                                                                                                                                                                    |                                                                                     |  |  |  |  |  |  |
| <b>12</b>                                                                                                                                                                                                                                                     | Receipt of equipment, materials, drugs, medical writing, gifts or other services | <input checked="" type="checkbox"/> <b>None</b><br><table border="1"> <tr><td></td><td></td></tr> <tr><td></td><td></td></tr> <tr><td></td><td></td></tr> </table> |                                                                                     |  |  |  |  |  |  |
|                                                                                                                                                                                                                                                               |                                                                                  |                                                                                                                                                                    |                                                                                     |  |  |  |  |  |  |
|                                                                                                                                                                                                                                                               |                                                                                  |                                                                                                                                                                    |                                                                                     |  |  |  |  |  |  |
|                                                                                                                                                                                                                                                               |                                                                                  |                                                                                                                                                                    |                                                                                     |  |  |  |  |  |  |
| <b>13</b>                                                                                                                                                                                                                                                     | Other financial or non-financial interests                                       | <input checked="" type="checkbox"/> <b>None</b><br><table border="1"> <tr><td></td><td></td></tr> <tr><td></td><td></td></tr> <tr><td></td><td></td></tr> </table> |                                                                                     |  |  |  |  |  |  |
|                                                                                                                                                                                                                                                               |                                                                                  |                                                                                                                                                                    |                                                                                     |  |  |  |  |  |  |
|                                                                                                                                                                                                                                                               |                                                                                  |                                                                                                                                                                    |                                                                                     |  |  |  |  |  |  |
|                                                                                                                                                                                                                                                               |                                                                                  |                                                                                                                                                                    |                                                                                     |  |  |  |  |  |  |
| <p><b>Please place an "X" next to the following statement to indicate your agreement:</b></p> <p><input checked="" type="checkbox"/> I certify that I have answered every question and have not altered the wording of any of the questions on this form.</p> |                                                                                  |                                                                                                                                                                    |                                                                                     |  |  |  |  |  |  |

## ICMJE DISCLOSURE FORM

**Date:** 1/13/2022

**Your Name:** Justin F. Fraser, MD

**Manuscript Title:** Prospective Study on Embolization of Intracranial Aneurysms with the Pipeline Device (PREMIER study): 3-year results with the application of a flow diverter-specific occlusion classification

**Manuscript Number (if known):** neurintsurg-2021-018501

In the interest of transparency, we ask you to disclose all relationships/activities/interests listed below that are related to the content of your manuscript. "Related" means any relation with for-profit or not-for-profit third parties whose interests may be affected by the content of the manuscript. Disclosure represents a commitment to transparency and does not necessarily indicate a bias. If you are in doubt about whether to list a relationship/activity/interest, it is preferable that you do so.

The author's relationships/activities/interests should be defined broadly. For example, if your manuscript pertains to the epidemiology of hypertension, you should declare all relationships with manufacturers of antihypertensive medication, even if that medication is not mentioned in the manuscript.

In item #1 below, report all support for the work reported in this manuscript without time limit. For all other items, the time frame for disclosure is the past 36 months.

|                                                           | Name all entities with whom you have this relationship or indicate none (add rows as needed)                                                                                   | Specifications/Comments (e.g., if payments were made to you or to your institution)                                                                                                                                                        |                        |               |                            |               |  |  |
|-----------------------------------------------------------|--------------------------------------------------------------------------------------------------------------------------------------------------------------------------------|--------------------------------------------------------------------------------------------------------------------------------------------------------------------------------------------------------------------------------------------|------------------------|---------------|----------------------------|---------------|--|--|
| <b>Time frame: Since the initial planning of the work</b> |                                                                                                                                                                                |                                                                                                                                                                                                                                            |                        |               |                            |               |  |  |
| <b>1</b>                                                  | All support for the present manuscript (e.g., funding, provision of study materials, medical writing, article processing charges, etc.)<br><b>No time limit for this item.</b> | <input checked="" type="checkbox"/> <b>None</b><br><table border="1"> <tr><td></td><td></td></tr> <tr><td></td><td></td></tr> <tr><td></td><td></td></tr> </table> Click the tab key to add additional rows.                               |                        |               |                            |               |  |  |
|                                                           |                                                                                                                                                                                |                                                                                                                                                                                                                                            |                        |               |                            |               |  |  |
|                                                           |                                                                                                                                                                                |                                                                                                                                                                                                                                            |                        |               |                            |               |  |  |
|                                                           |                                                                                                                                                                                |                                                                                                                                                                                                                                            |                        |               |                            |               |  |  |
| <b>Time frame: past 36 months</b>                         |                                                                                                                                                                                |                                                                                                                                                                                                                                            |                        |               |                            |               |  |  |
| <b>2</b>                                                  | Grants or contracts from any entity (if not indicated in item #1 above).                                                                                                       | <input type="checkbox"/> <b>None</b><br><table border="1"> <tr> <td>University of Kentucky</td> <td>Grant support</td> </tr> <tr> <td>American Heart Association</td> <td>Grant support</td> </tr> <tr> <td></td> <td></td> </tr> </table> | University of Kentucky | Grant support | American Heart Association | Grant support |  |  |
| University of Kentucky                                    | Grant support                                                                                                                                                                  |                                                                                                                                                                                                                                            |                        |               |                            |               |  |  |
| American Heart Association                                | Grant support                                                                                                                                                                  |                                                                                                                                                                                                                                            |                        |               |                            |               |  |  |
|                                                           |                                                                                                                                                                                |                                                                                                                                                                                                                                            |                        |               |                            |               |  |  |
| <b>3</b>                                                  | Royalties or licenses                                                                                                                                                          | <input checked="" type="checkbox"/> <b>None</b><br><table border="1"> <tr><td></td><td></td></tr> <tr><td></td><td></td></tr> <tr><td></td><td></td></tr> </table>                                                                         |                        |               |                            |               |  |  |
|                                                           |                                                                                                                                                                                |                                                                                                                                                                                                                                            |                        |               |                            |               |  |  |
|                                                           |                                                                                                                                                                                |                                                                                                                                                                                                                                            |                        |               |                            |               |  |  |
|                                                           |                                                                                                                                                                                |                                                                                                                                                                                                                                            |                        |               |                            |               |  |  |

|                                               |                                                                                                              | Name all entities with whom you have this relationship or indicate none (add rows as needed)                                                                                                                                                                                                                                                                                                                               | Specifications/Comments (e.g., if payments were made to you or to your institution) |                                      |                                    |                                  |                         |                            |                                               |                 |  |
|-----------------------------------------------|--------------------------------------------------------------------------------------------------------------|----------------------------------------------------------------------------------------------------------------------------------------------------------------------------------------------------------------------------------------------------------------------------------------------------------------------------------------------------------------------------------------------------------------------------|-------------------------------------------------------------------------------------|--------------------------------------|------------------------------------|----------------------------------|-------------------------|----------------------------|-----------------------------------------------|-----------------|--|
| 4                                             | Consulting fees                                                                                              | <input type="checkbox"/> None<br><table border="1"> <tr> <td>Stream Biomedical</td> <td>Consultation Reimbursement</td> </tr> <tr> <td>Penumbra</td> <td>Consultation Reimbursement</td> </tr> <tr> <td>Medtronic</td> <td>Consultation Reimbursement</td> </tr> <tr> <td></td> <td></td> </tr> </table>                                                                                                                   | Stream Biomedical                                                                   | Consultation Reimbursement           | Penumbra                           | Consultation Reimbursement       | Medtronic               | Consultation Reimbursement |                                               |                 |  |
| Stream Biomedical                             | Consultation Reimbursement                                                                                   |                                                                                                                                                                                                                                                                                                                                                                                                                            |                                                                                     |                                      |                                    |                                  |                         |                            |                                               |                 |  |
| Penumbra                                      | Consultation Reimbursement                                                                                   |                                                                                                                                                                                                                                                                                                                                                                                                                            |                                                                                     |                                      |                                    |                                  |                         |                            |                                               |                 |  |
| Medtronic                                     | Consultation Reimbursement                                                                                   |                                                                                                                                                                                                                                                                                                                                                                                                                            |                                                                                     |                                      |                                    |                                  |                         |                            |                                               |                 |  |
|                                               |                                                                                                              |                                                                                                                                                                                                                                                                                                                                                                                                                            |                                                                                     |                                      |                                    |                                  |                         |                            |                                               |                 |  |
| 5                                             | Payment or honoraria for lectures, presentations, speakers bureaus, manuscript writing or educational events | <input checked="" type="checkbox"/> None<br><table border="1"> <tr> <td></td> <td></td> </tr> <tr> <td></td> <td></td> </tr> <tr> <td></td> <td></td> </tr> </table>                                                                                                                                                                                                                                                       |                                                                                     |                                      |                                    |                                  |                         |                            |                                               |                 |  |
|                                               |                                                                                                              |                                                                                                                                                                                                                                                                                                                                                                                                                            |                                                                                     |                                      |                                    |                                  |                         |                            |                                               |                 |  |
|                                               |                                                                                                              |                                                                                                                                                                                                                                                                                                                                                                                                                            |                                                                                     |                                      |                                    |                                  |                         |                            |                                               |                 |  |
|                                               |                                                                                                              |                                                                                                                                                                                                                                                                                                                                                                                                                            |                                                                                     |                                      |                                    |                                  |                         |                            |                                               |                 |  |
| 6                                             | Payment for expert testimony                                                                                 | <input checked="" type="checkbox"/> None<br><table border="1"> <tr> <td></td> <td></td> </tr> <tr> <td></td> <td></td> </tr> <tr> <td></td> <td></td> </tr> </table>                                                                                                                                                                                                                                                       |                                                                                     |                                      |                                    |                                  |                         |                            |                                               |                 |  |
|                                               |                                                                                                              |                                                                                                                                                                                                                                                                                                                                                                                                                            |                                                                                     |                                      |                                    |                                  |                         |                            |                                               |                 |  |
|                                               |                                                                                                              |                                                                                                                                                                                                                                                                                                                                                                                                                            |                                                                                     |                                      |                                    |                                  |                         |                            |                                               |                 |  |
|                                               |                                                                                                              |                                                                                                                                                                                                                                                                                                                                                                                                                            |                                                                                     |                                      |                                    |                                  |                         |                            |                                               |                 |  |
| 7                                             | Support for attending meetings and/or travel                                                                 | <input checked="" type="checkbox"/> None<br><table border="1"> <tr> <td></td> <td></td> </tr> <tr> <td></td> <td></td> </tr> <tr> <td></td> <td></td> </tr> </table>                                                                                                                                                                                                                                                       |                                                                                     |                                      |                                    |                                  |                         |                            |                                               |                 |  |
|                                               |                                                                                                              |                                                                                                                                                                                                                                                                                                                                                                                                                            |                                                                                     |                                      |                                    |                                  |                         |                            |                                               |                 |  |
|                                               |                                                                                                              |                                                                                                                                                                                                                                                                                                                                                                                                                            |                                                                                     |                                      |                                    |                                  |                         |                            |                                               |                 |  |
|                                               |                                                                                                              |                                                                                                                                                                                                                                                                                                                                                                                                                            |                                                                                     |                                      |                                    |                                  |                         |                            |                                               |                 |  |
| 8                                             | Patents planned, issued or pending                                                                           | <input type="checkbox"/> None<br><table border="1"> <tr> <td>University of Kentucky</td> <td>Patents issued and pending</td> </tr> <tr> <td></td> <td></td> </tr> <tr> <td></td> <td></td> </tr> </table>                                                                                                                                                                                                                  | University of Kentucky                                                              | Patents issued and pending           |                                    |                                  |                         |                            |                                               |                 |  |
| University of Kentucky                        | Patents issued and pending                                                                                   |                                                                                                                                                                                                                                                                                                                                                                                                                            |                                                                                     |                                      |                                    |                                  |                         |                            |                                               |                 |  |
|                                               |                                                                                                              |                                                                                                                                                                                                                                                                                                                                                                                                                            |                                                                                     |                                      |                                    |                                  |                         |                            |                                               |                 |  |
|                                               |                                                                                                              |                                                                                                                                                                                                                                                                                                                                                                                                                            |                                                                                     |                                      |                                    |                                  |                         |                            |                                               |                 |  |
| 9                                             | Participation on a Data Safety Monitoring Board or Advisory Board                                            | <input type="checkbox"/> None<br><table border="1"> <tr> <td>Imperative Care</td> <td>Data Safety and Monitoring Board</td> </tr> <tr> <td>Evasc</td> <td>Data Safety and Monitoring Board</td> </tr> <tr> <td></td> <td></td> </tr> </table>                                                                                                                                                                              | Imperative Care                                                                     | Data Safety and Monitoring Board     | Evasc                              | Data Safety and Monitoring Board |                         |                            |                                               |                 |  |
| Imperative Care                               | Data Safety and Monitoring Board                                                                             |                                                                                                                                                                                                                                                                                                                                                                                                                            |                                                                                     |                                      |                                    |                                  |                         |                            |                                               |                 |  |
| Evasc                                         | Data Safety and Monitoring Board                                                                             |                                                                                                                                                                                                                                                                                                                                                                                                                            |                                                                                     |                                      |                                    |                                  |                         |                            |                                               |                 |  |
|                                               |                                                                                                              |                                                                                                                                                                                                                                                                                                                                                                                                                            |                                                                                     |                                      |                                    |                                  |                         |                            |                                               |                 |  |
| 10                                            | Leadership or fiduciary role in other board, society, committee or advocacy group, paid or unpaid            | <input type="checkbox"/> None<br><table border="1"> <tr> <td>Society of NeuroInterventional Surgery</td> <td>Board Member – Audit Committee Chair</td> </tr> <tr> <td>Cerebrovascular Section (AANS/CNS)</td> <td>Nominating Committee</td> </tr> <tr> <td>Journal of Neurosurgery</td> <td>Editorial Board</td> </tr> <tr> <td>Journal of Neurointerventional Surgery (JNIS)</td> <td>Editorial Board</td> </tr> </table> | Society of NeuroInterventional Surgery                                              | Board Member – Audit Committee Chair | Cerebrovascular Section (AANS/CNS) | Nominating Committee             | Journal of Neurosurgery | Editorial Board            | Journal of Neurointerventional Surgery (JNIS) | Editorial Board |  |
| Society of NeuroInterventional Surgery        | Board Member – Audit Committee Chair                                                                         |                                                                                                                                                                                                                                                                                                                                                                                                                            |                                                                                     |                                      |                                    |                                  |                         |                            |                                               |                 |  |
| Cerebrovascular Section (AANS/CNS)            | Nominating Committee                                                                                         |                                                                                                                                                                                                                                                                                                                                                                                                                            |                                                                                     |                                      |                                    |                                  |                         |                            |                                               |                 |  |
| Journal of Neurosurgery                       | Editorial Board                                                                                              |                                                                                                                                                                                                                                                                                                                                                                                                                            |                                                                                     |                                      |                                    |                                  |                         |                            |                                               |                 |  |
| Journal of Neurointerventional Surgery (JNIS) | Editorial Board                                                                                              |                                                                                                                                                                                                                                                                                                                                                                                                                            |                                                                                     |                                      |                                    |                                  |                         |                            |                                               |                 |  |

|           |                                                                                  | Name all entities with whom you have this relationship or indicate none (add rows as needed) | Specifications/Comments (e.g., if payments were made to you or to your institution) |
|-----------|----------------------------------------------------------------------------------|----------------------------------------------------------------------------------------------|-------------------------------------------------------------------------------------|
| <b>11</b> | Stock or stock options                                                           | <input type="checkbox"/> <b>None</b>                                                         |                                                                                     |
|           |                                                                                  | Fawkes Biotechnology                                                                         | Equity Interest                                                                     |
|           |                                                                                  | Cerelux                                                                                      | Equity Interest                                                                     |
|           |                                                                                  |                                                                                              |                                                                                     |
| <b>12</b> | Receipt of equipment, materials, drugs, medical writing, gifts or other services | <input checked="" type="checkbox"/> <b>None</b>                                              |                                                                                     |
|           |                                                                                  |                                                                                              |                                                                                     |
|           |                                                                                  |                                                                                              |                                                                                     |
|           |                                                                                  |                                                                                              |                                                                                     |
| <b>13</b> | Other financial or non-financial interests                                       | <input checked="" type="checkbox"/> <b>None</b>                                              |                                                                                     |
|           |                                                                                  |                                                                                              |                                                                                     |
|           |                                                                                  |                                                                                              |                                                                                     |
|           |                                                                                  |                                                                                              |                                                                                     |

**Please place an "X" next to the following statement to indicate your agreement:**

☒ I certify that I have answered every question and have not altered the wording of any of the questions on this form.

## ICMJE DISCLOSURE FORM

**Date:** 1/18/2022

**Your Name:** MAXIM MOKIN

**Manuscript Title:** " Prospective Study on Embolization of Intracranial Aneurysms with the Pipeline Device (PREMIER study): 3-year results with the application of a flow diverter-specific occlusion classification "

**Manuscript Number (if known):** neurintsurg-2021-018501

In the interest of transparency, we ask you to disclose all relationships/activities/interests listed below that are related to the content of your manuscript. "Related" means any relation with for-profit or not-for-profit third parties whose interests may be affected by the content of the manuscript. Disclosure represents a commitment to transparency and does not necessarily indicate a bias. If you are in doubt about whether to list a relationship/activity/interest, it is preferable that you do so.

In the interest of transparency, we ask you to disclose all relationships/activities/interests listed below that are related to the content of your manuscript. "Related" means any relation with for-profit or not-for-profit third parties whose interests may be affected by the content of the manuscript. Disclosure represents a commitment to transparency and does not necessarily indicate a bias. If you are in doubt about whether to list a relationship/activity/interest, it is preferable that you do so.

The author's relationships/activities/interests should be defined broadly. For example, if your manuscript pertains to the epidemiology of hypertension, you should declare all relationships with manufacturers of antihypertensive medication, even if that medication is not mentioned in the manuscript.

In item #1 below, report all support for the work reported in this manuscript without time limit. For all other items, the time frame for disclosure is the past 36 months.

|                                                           | Name all entities with whom you have this relationship or indicate none (add rows as needed)                                                                                   | Specifications/Comments (e.g., if payments were made to you or to your institution)                                                                                                                          |                       |             |  |  |  |  |
|-----------------------------------------------------------|--------------------------------------------------------------------------------------------------------------------------------------------------------------------------------|--------------------------------------------------------------------------------------------------------------------------------------------------------------------------------------------------------------|-----------------------|-------------|--|--|--|--|
| <b>Time frame: Since the initial planning of the work</b> |                                                                                                                                                                                |                                                                                                                                                                                                              |                       |             |  |  |  |  |
| <b>1</b>                                                  | All support for the present manuscript (e.g., funding, provision of study materials, medical writing, article processing charges, etc.)<br><b>No time limit for this item.</b> | <input checked="" type="checkbox"/> <b>None</b><br><table border="1"> <tr><td></td><td></td></tr> <tr><td></td><td></td></tr> <tr><td></td><td></td></tr> </table> Click the tab key to add additional rows. |                       |             |  |  |  |  |
|                                                           |                                                                                                                                                                                |                                                                                                                                                                                                              |                       |             |  |  |  |  |
|                                                           |                                                                                                                                                                                |                                                                                                                                                                                                              |                       |             |  |  |  |  |
|                                                           |                                                                                                                                                                                |                                                                                                                                                                                                              |                       |             |  |  |  |  |
| <b>Time frame: past 36 months</b>                         |                                                                                                                                                                                |                                                                                                                                                                                                              |                       |             |  |  |  |  |
| <b>2</b>                                                  | Grants or contracts from any entity (if not indicated in item #1 above).                                                                                                       | <input type="checkbox"/> <b>None</b><br><table border="1"> <tr> <td>NIH grant R21NS109575</td> <td>Institution</td> </tr> <tr><td></td><td></td></tr> <tr><td></td><td></td></tr> </table>                   | NIH grant R21NS109575 | Institution |  |  |  |  |
| NIH grant R21NS109575                                     | Institution                                                                                                                                                                    |                                                                                                                                                                                                              |                       |             |  |  |  |  |
|                                                           |                                                                                                                                                                                |                                                                                                                                                                                                              |                       |             |  |  |  |  |
|                                                           |                                                                                                                                                                                |                                                                                                                                                                                                              |                       |             |  |  |  |  |

|                                     |                                                                                                              | Name all entities with whom you have this relationship or indicate none (add rows as needed)                                                                                                                                   | Specifications/Comments (e.g., if payments were made to you or to your institution) |       |  |  |  |  |  |  |  |
|-------------------------------------|--------------------------------------------------------------------------------------------------------------|--------------------------------------------------------------------------------------------------------------------------------------------------------------------------------------------------------------------------------|-------------------------------------------------------------------------------------|-------|--|--|--|--|--|--|--|
| <b>3</b>                            | Royalties or licenses                                                                                        | <input checked="" type="checkbox"/> <b>None</b><br><table border="1"> <tr><td></td><td></td></tr> <tr><td></td><td></td></tr> <tr><td></td><td></td></tr> </table>                                                             |                                                                                     |       |  |  |  |  |  |  |  |
|                                     |                                                                                                              |                                                                                                                                                                                                                                |                                                                                     |       |  |  |  |  |  |  |  |
|                                     |                                                                                                              |                                                                                                                                                                                                                                |                                                                                     |       |  |  |  |  |  |  |  |
|                                     |                                                                                                              |                                                                                                                                                                                                                                |                                                                                     |       |  |  |  |  |  |  |  |
| <b>4</b>                            | Consulting fees                                                                                              | <input type="checkbox"/> <b>None</b><br><table border="1"> <tr> <td>Medtronic, Cerenovus, Canon Medical</td> <td>To me</td> </tr> <tr><td></td><td></td></tr> <tr><td></td><td></td></tr> <tr><td></td><td></td></tr> </table> | Medtronic, Cerenovus, Canon Medical                                                 | To me |  |  |  |  |  |  |  |
| Medtronic, Cerenovus, Canon Medical | To me                                                                                                        |                                                                                                                                                                                                                                |                                                                                     |       |  |  |  |  |  |  |  |
|                                     |                                                                                                              |                                                                                                                                                                                                                                |                                                                                     |       |  |  |  |  |  |  |  |
|                                     |                                                                                                              |                                                                                                                                                                                                                                |                                                                                     |       |  |  |  |  |  |  |  |
|                                     |                                                                                                              |                                                                                                                                                                                                                                |                                                                                     |       |  |  |  |  |  |  |  |
| <b>5</b>                            | Payment or honoraria for lectures, presentations, speakers bureaus, manuscript writing or educational events | <input checked="" type="checkbox"/> <b>None</b><br><table border="1"> <tr><td></td><td></td></tr> <tr><td></td><td></td></tr> <tr><td></td><td></td></tr> </table>                                                             |                                                                                     |       |  |  |  |  |  |  |  |
|                                     |                                                                                                              |                                                                                                                                                                                                                                |                                                                                     |       |  |  |  |  |  |  |  |
|                                     |                                                                                                              |                                                                                                                                                                                                                                |                                                                                     |       |  |  |  |  |  |  |  |
|                                     |                                                                                                              |                                                                                                                                                                                                                                |                                                                                     |       |  |  |  |  |  |  |  |
| <b>6</b>                            | Payment for expert testimony                                                                                 | <input checked="" type="checkbox"/> <b>None</b><br><table border="1"> <tr><td></td><td></td></tr> <tr><td></td><td></td></tr> <tr><td></td><td></td></tr> </table>                                                             |                                                                                     |       |  |  |  |  |  |  |  |
|                                     |                                                                                                              |                                                                                                                                                                                                                                |                                                                                     |       |  |  |  |  |  |  |  |
|                                     |                                                                                                              |                                                                                                                                                                                                                                |                                                                                     |       |  |  |  |  |  |  |  |
|                                     |                                                                                                              |                                                                                                                                                                                                                                |                                                                                     |       |  |  |  |  |  |  |  |
| <b>7</b>                            | Support for attending meetings and/or travel                                                                 | <input checked="" type="checkbox"/> <b>None</b><br><table border="1"> <tr><td></td><td></td></tr> <tr><td></td><td></td></tr> <tr><td></td><td></td></tr> </table>                                                             |                                                                                     |       |  |  |  |  |  |  |  |
|                                     |                                                                                                              |                                                                                                                                                                                                                                |                                                                                     |       |  |  |  |  |  |  |  |
|                                     |                                                                                                              |                                                                                                                                                                                                                                |                                                                                     |       |  |  |  |  |  |  |  |
|                                     |                                                                                                              |                                                                                                                                                                                                                                |                                                                                     |       |  |  |  |  |  |  |  |
| <b>8</b>                            | Patents planned, issued or pending                                                                           | <input checked="" type="checkbox"/> <b>None</b><br><table border="1"> <tr><td></td><td></td></tr> <tr><td></td><td></td></tr> <tr><td></td><td></td></tr> </table>                                                             |                                                                                     |       |  |  |  |  |  |  |  |
|                                     |                                                                                                              |                                                                                                                                                                                                                                |                                                                                     |       |  |  |  |  |  |  |  |
|                                     |                                                                                                              |                                                                                                                                                                                                                                |                                                                                     |       |  |  |  |  |  |  |  |
|                                     |                                                                                                              |                                                                                                                                                                                                                                |                                                                                     |       |  |  |  |  |  |  |  |
| <b>9</b>                            | Participation on a Data Safety Monitoring Board or Advisory Board                                            | <input checked="" type="checkbox"/> <b>None</b><br><table border="1"> <tr><td></td><td></td></tr> <tr><td></td><td></td></tr> <tr><td></td><td></td></tr> </table>                                                             |                                                                                     |       |  |  |  |  |  |  |  |
|                                     |                                                                                                              |                                                                                                                                                                                                                                |                                                                                     |       |  |  |  |  |  |  |  |
|                                     |                                                                                                              |                                                                                                                                                                                                                                |                                                                                     |       |  |  |  |  |  |  |  |
|                                     |                                                                                                              |                                                                                                                                                                                                                                |                                                                                     |       |  |  |  |  |  |  |  |
| <b>10</b>                           | Leadership or fiduciary role in other board,                                                                 | <input type="checkbox"/> <b>None</b><br><table border="1"> <tr> <td>Assistant Editor, JNIS</td> <td></td> </tr> </table>                                                                                                       | Assistant Editor, JNIS                                                              |       |  |  |  |  |  |  |  |
| Assistant Editor, JNIS              |                                                                                                              |                                                                                                                                                                                                                                |                                                                                     |       |  |  |  |  |  |  |  |

|                                                                                                                                                                                                                                                               |                                                                                  | Name all entities with whom you have this relationship or indicate none (add rows as needed) | Specifications/Comments (e.g., if payments were made to you or to your institution) |
|---------------------------------------------------------------------------------------------------------------------------------------------------------------------------------------------------------------------------------------------------------------|----------------------------------------------------------------------------------|----------------------------------------------------------------------------------------------|-------------------------------------------------------------------------------------|
|                                                                                                                                                                                                                                                               | society, committee or advocacy group, paid or unpaid                             |                                                                                              |                                                                                     |
| <b>11</b>                                                                                                                                                                                                                                                     | Stock or stock options                                                           | <input type="checkbox"/> <b>None</b>                                                         |                                                                                     |
|                                                                                                                                                                                                                                                               |                                                                                  | BrainQ, Endostream, Serenity medical, Synchron, Sim&Cure                                     |                                                                                     |
|                                                                                                                                                                                                                                                               |                                                                                  |                                                                                              |                                                                                     |
|                                                                                                                                                                                                                                                               |                                                                                  |                                                                                              |                                                                                     |
| <b>12</b>                                                                                                                                                                                                                                                     | Receipt of equipment, materials, drugs, medical writing, gifts or other services | <input checked="" type="checkbox"/> <b>None</b>                                              |                                                                                     |
|                                                                                                                                                                                                                                                               |                                                                                  |                                                                                              |                                                                                     |
|                                                                                                                                                                                                                                                               |                                                                                  |                                                                                              |                                                                                     |
|                                                                                                                                                                                                                                                               |                                                                                  |                                                                                              |                                                                                     |
| <b>13</b>                                                                                                                                                                                                                                                     | Other financial or non-financial interests                                       | <input checked="" type="checkbox"/> <b>None</b>                                              |                                                                                     |
|                                                                                                                                                                                                                                                               |                                                                                  |                                                                                              |                                                                                     |
|                                                                                                                                                                                                                                                               |                                                                                  |                                                                                              |                                                                                     |
|                                                                                                                                                                                                                                                               |                                                                                  |                                                                                              |                                                                                     |
| <p><b>Please place an "X" next to the following statement to indicate your agreement:</b></p> <p><input checked="" type="checkbox"/> I certify that I have answered every question and have not altered the wording of any of the questions on this form.</p> |                                                                                  |                                                                                              |                                                                                     |

## ICMJE DISCLOSURE FORM

**Date:** 1/25/2022

**Your Name:** C. Michael Cawley

**Manuscript Title:** Prospective Study on Embolization of Intracranial Aneurysms with the Pipeline Device (PREMIER study): 3-year results with the application of a flow diverter-specific occlusion classification

**Manuscript Number (if known):** neurintsurg-2021-018501

In the interest of transparency, we ask you to disclose all relationships/activities/interests listed below that are related to the content of your manuscript. "Related" means any relation with for-profit or not-for-profit third parties whose interests may be affected by the content of the manuscript. Disclosure represents a commitment to transparency and does not necessarily indicate a bias. If you are in doubt about whether to list a relationship/activity/interest, it is preferable that you do so.

The author's relationships/activities/interests should be defined broadly. For example, if your manuscript pertains to the epidemiology of hypertension, you should declare all relationships with manufacturers of antihypertensive medication, even if that medication is not mentioned in the manuscript.

In item #1 below, report all support for the work reported in this manuscript without time limit. For all other items, the time frame for disclosure is the past 36 months.

|                                                           | Name all entities with whom you have this relationship or indicate none (add rows as needed)                                                                                   | Specifications/Comments (e.g., if payments were made to you or to your institution)                                                                                                                          |  |  |  |  |  |  |
|-----------------------------------------------------------|--------------------------------------------------------------------------------------------------------------------------------------------------------------------------------|--------------------------------------------------------------------------------------------------------------------------------------------------------------------------------------------------------------|--|--|--|--|--|--|
| <b>Time frame: Since the initial planning of the work</b> |                                                                                                                                                                                |                                                                                                                                                                                                              |  |  |  |  |  |  |
| <b>1</b>                                                  | All support for the present manuscript (e.g., funding, provision of study materials, medical writing, article processing charges, etc.)<br><b>No time limit for this item.</b> | <input checked="" type="checkbox"/> <b>None</b><br><table border="1"> <tr><td></td><td></td></tr> <tr><td></td><td></td></tr> <tr><td></td><td></td></tr> </table> Click the tab key to add additional rows. |  |  |  |  |  |  |
|                                                           |                                                                                                                                                                                |                                                                                                                                                                                                              |  |  |  |  |  |  |
|                                                           |                                                                                                                                                                                |                                                                                                                                                                                                              |  |  |  |  |  |  |
|                                                           |                                                                                                                                                                                |                                                                                                                                                                                                              |  |  |  |  |  |  |
| <b>Time frame: past 36 months</b>                         |                                                                                                                                                                                |                                                                                                                                                                                                              |  |  |  |  |  |  |
| <b>2</b>                                                  | Grants or contracts from any entity (if not indicated in item #1 above).                                                                                                       | <input checked="" type="checkbox"/> <b>None</b><br><table border="1"> <tr><td></td><td></td></tr> <tr><td></td><td></td></tr> <tr><td></td><td></td></tr> </table>                                           |  |  |  |  |  |  |
|                                                           |                                                                                                                                                                                |                                                                                                                                                                                                              |  |  |  |  |  |  |
|                                                           |                                                                                                                                                                                |                                                                                                                                                                                                              |  |  |  |  |  |  |
|                                                           |                                                                                                                                                                                |                                                                                                                                                                                                              |  |  |  |  |  |  |
| <b>3</b>                                                  | Royalties or licenses                                                                                                                                                          | <input checked="" type="checkbox"/> <b>None</b><br><table border="1"> <tr><td></td><td></td></tr> <tr><td></td><td></td></tr> <tr><td></td><td></td></tr> </table>                                           |  |  |  |  |  |  |
|                                                           |                                                                                                                                                                                |                                                                                                                                                                                                              |  |  |  |  |  |  |
|                                                           |                                                                                                                                                                                |                                                                                                                                                                                                              |  |  |  |  |  |  |
|                                                           |                                                                                                                                                                                |                                                                                                                                                                                                              |  |  |  |  |  |  |



|    |                                                                                                              | Name all entities with whom you have this relationship or indicate none (add rows as needed)                                                                                                   | Specifications/Comments (e.g., if payments were made to you or to your institution) |  |  |  |  |  |  |  |  |
|----|--------------------------------------------------------------------------------------------------------------|------------------------------------------------------------------------------------------------------------------------------------------------------------------------------------------------|-------------------------------------------------------------------------------------|--|--|--|--|--|--|--|--|
| 4  | Consulting fees                                                                                              | <input checked="" type="checkbox"/> <b>None</b><br><table border="1"> <tr><td></td><td></td></tr> <tr><td></td><td></td></tr> <tr><td></td><td></td></tr> <tr><td></td><td></td></tr> </table> |                                                                                     |  |  |  |  |  |  |  |  |
|    |                                                                                                              |                                                                                                                                                                                                |                                                                                     |  |  |  |  |  |  |  |  |
|    |                                                                                                              |                                                                                                                                                                                                |                                                                                     |  |  |  |  |  |  |  |  |
|    |                                                                                                              |                                                                                                                                                                                                |                                                                                     |  |  |  |  |  |  |  |  |
|    |                                                                                                              |                                                                                                                                                                                                |                                                                                     |  |  |  |  |  |  |  |  |
| 5  | Payment or honoraria for lectures, presentations, speakers bureaus, manuscript writing or educational events | <input checked="" type="checkbox"/> <b>None</b><br><table border="1"> <tr><td></td><td></td></tr> <tr><td></td><td></td></tr> <tr><td></td><td></td></tr> </table>                             |                                                                                     |  |  |  |  |  |  |  |  |
|    |                                                                                                              |                                                                                                                                                                                                |                                                                                     |  |  |  |  |  |  |  |  |
|    |                                                                                                              |                                                                                                                                                                                                |                                                                                     |  |  |  |  |  |  |  |  |
|    |                                                                                                              |                                                                                                                                                                                                |                                                                                     |  |  |  |  |  |  |  |  |
| 6  | Payment for expert testimony                                                                                 | <input checked="" type="checkbox"/> <b>None</b><br><table border="1"> <tr><td></td><td></td></tr> <tr><td></td><td></td></tr> <tr><td></td><td></td></tr> </table>                             |                                                                                     |  |  |  |  |  |  |  |  |
|    |                                                                                                              |                                                                                                                                                                                                |                                                                                     |  |  |  |  |  |  |  |  |
|    |                                                                                                              |                                                                                                                                                                                                |                                                                                     |  |  |  |  |  |  |  |  |
|    |                                                                                                              |                                                                                                                                                                                                |                                                                                     |  |  |  |  |  |  |  |  |
| 7  | Support for attending meetings and/or travel                                                                 | <input checked="" type="checkbox"/> <b>None</b><br><table border="1"> <tr><td></td><td></td></tr> <tr><td></td><td></td></tr> <tr><td></td><td></td></tr> </table>                             |                                                                                     |  |  |  |  |  |  |  |  |
|    |                                                                                                              |                                                                                                                                                                                                |                                                                                     |  |  |  |  |  |  |  |  |
|    |                                                                                                              |                                                                                                                                                                                                |                                                                                     |  |  |  |  |  |  |  |  |
|    |                                                                                                              |                                                                                                                                                                                                |                                                                                     |  |  |  |  |  |  |  |  |
| 8  | Patents planned, issued or pending                                                                           | <input checked="" type="checkbox"/> <b>None</b><br><table border="1"> <tr><td></td><td></td></tr> <tr><td></td><td></td></tr> <tr><td></td><td></td></tr> </table>                             |                                                                                     |  |  |  |  |  |  |  |  |
|    |                                                                                                              |                                                                                                                                                                                                |                                                                                     |  |  |  |  |  |  |  |  |
|    |                                                                                                              |                                                                                                                                                                                                |                                                                                     |  |  |  |  |  |  |  |  |
|    |                                                                                                              |                                                                                                                                                                                                |                                                                                     |  |  |  |  |  |  |  |  |
| 9  | Participation on a Data Safety Monitoring Board or Advisory Board                                            | <input checked="" type="checkbox"/> <b>None</b><br><table border="1"> <tr><td></td><td></td></tr> <tr><td></td><td></td></tr> <tr><td></td><td></td></tr> </table>                             |                                                                                     |  |  |  |  |  |  |  |  |
|    |                                                                                                              |                                                                                                                                                                                                |                                                                                     |  |  |  |  |  |  |  |  |
|    |                                                                                                              |                                                                                                                                                                                                |                                                                                     |  |  |  |  |  |  |  |  |
|    |                                                                                                              |                                                                                                                                                                                                |                                                                                     |  |  |  |  |  |  |  |  |
| 10 | Leadership or fiduciary role in other board, society, committee or advocacy group, paid or unpaid            | <input checked="" type="checkbox"/> <b>None</b><br><table border="1"> <tr><td></td><td></td></tr> <tr><td></td><td></td></tr> <tr><td></td><td></td></tr> </table>                             |                                                                                     |  |  |  |  |  |  |  |  |
|    |                                                                                                              |                                                                                                                                                                                                |                                                                                     |  |  |  |  |  |  |  |  |
|    |                                                                                                              |                                                                                                                                                                                                |                                                                                     |  |  |  |  |  |  |  |  |
|    |                                                                                                              |                                                                                                                                                                                                |                                                                                     |  |  |  |  |  |  |  |  |

|                                                                                                                                                                                                                                                               |                                                                                  | Name all entities with whom you have this relationship or indicate none (add rows as needed)                                                                                            | Specifications/Comments (e.g., if payments were made to you or to your institution) |  |  |  |  |  |  |
|---------------------------------------------------------------------------------------------------------------------------------------------------------------------------------------------------------------------------------------------------------------|----------------------------------------------------------------------------------|-----------------------------------------------------------------------------------------------------------------------------------------------------------------------------------------|-------------------------------------------------------------------------------------|--|--|--|--|--|--|
| <b>11</b>                                                                                                                                                                                                                                                     | Stock or stock options                                                           | <input checked="" type="checkbox"/> <b>None</b><br><table border="1" style="width: 100%;"> <tr><td></td><td></td></tr> <tr><td></td><td></td></tr> <tr><td></td><td></td></tr> </table> |                                                                                     |  |  |  |  |  |  |
|                                                                                                                                                                                                                                                               |                                                                                  |                                                                                                                                                                                         |                                                                                     |  |  |  |  |  |  |
|                                                                                                                                                                                                                                                               |                                                                                  |                                                                                                                                                                                         |                                                                                     |  |  |  |  |  |  |
|                                                                                                                                                                                                                                                               |                                                                                  |                                                                                                                                                                                         |                                                                                     |  |  |  |  |  |  |
| <b>12</b>                                                                                                                                                                                                                                                     | Receipt of equipment, materials, drugs, medical writing, gifts or other services | <input checked="" type="checkbox"/> <b>None</b><br><table border="1" style="width: 100%;"> <tr><td></td><td></td></tr> <tr><td></td><td></td></tr> <tr><td></td><td></td></tr> </table> |                                                                                     |  |  |  |  |  |  |
|                                                                                                                                                                                                                                                               |                                                                                  |                                                                                                                                                                                         |                                                                                     |  |  |  |  |  |  |
|                                                                                                                                                                                                                                                               |                                                                                  |                                                                                                                                                                                         |                                                                                     |  |  |  |  |  |  |
|                                                                                                                                                                                                                                                               |                                                                                  |                                                                                                                                                                                         |                                                                                     |  |  |  |  |  |  |
| <b>13</b>                                                                                                                                                                                                                                                     | Other financial or non-financial interests                                       | <input checked="" type="checkbox"/> <b>None</b><br><table border="1" style="width: 100%;"> <tr><td></td><td></td></tr> <tr><td></td><td></td></tr> <tr><td></td><td></td></tr> </table> |                                                                                     |  |  |  |  |  |  |
|                                                                                                                                                                                                                                                               |                                                                                  |                                                                                                                                                                                         |                                                                                     |  |  |  |  |  |  |
|                                                                                                                                                                                                                                                               |                                                                                  |                                                                                                                                                                                         |                                                                                     |  |  |  |  |  |  |
|                                                                                                                                                                                                                                                               |                                                                                  |                                                                                                                                                                                         |                                                                                     |  |  |  |  |  |  |
| <p><b>Please place an "X" next to the following statement to indicate your agreement:</b></p> <p><input checked="" type="checkbox"/> I certify that I have answered every question and have not altered the wording of any of the questions on this form.</p> |                                                                                  |                                                                                                                                                                                         |                                                                                     |  |  |  |  |  |  |

ICMJE DISCLOSURE FORM

Date:

1/14/2022

Your Name:

Michael Chen

Manuscript Title:

Prospective Study on Embolization of Intracranial Aneurysms with the Pipeline Device (PREMIER study): 3-year results with the application of a flow diverter-specific occlusion classification

Manuscript Number (if known):

neurintsurg-2021-018501

In the interest of transparency, we ask you to disclose all relationships/activities/interests listed below that are related to the content of your manuscript. “Related” means any relation with for-profit or not-for-profit third parties whose interests may be affected by the content of the manuscript. Disclosure represents a commitment to transparency and does not necessarily indicate a bias. If you are in doubt about whether to list a relationship/activity/interest, it is preferable that you do so.

The author’s relationships/activities/interests should be defined broadly. For example, if your manuscript pertains to the epidemiology of hypertension, you should declare all relationships with manufacturers of antihypertensive medication, even if that medication is not mentioned in the manuscript.

In item #1 below, report all support for the work reported in this manuscript without time limit. For all other items, the time frame for disclosure is the past 36 months.

|                                                    | Name all entities with whom you have this relationship or indicate none (add rows as needed)                                                                                                                                                                                                                                                                                      | Specifications/Comments (e.g., if payments were made to you or to your institution) |  |  |  |  |                                           |  |
|----------------------------------------------------|-----------------------------------------------------------------------------------------------------------------------------------------------------------------------------------------------------------------------------------------------------------------------------------------------------------------------------------------------------------------------------------|-------------------------------------------------------------------------------------|--|--|--|--|-------------------------------------------|--|
| Time frame: Since the initial planning of the work |                                                                                                                                                                                                                                                                                                                                                                                   |                                                                                     |  |  |  |  |                                           |  |
| 1                                                  | <div>All support for the present manuscript (e.g., funding, provision of study materials, medical writing, article processing charges, etc.)<br/>No time limit for this item.</div> <div><input checked="" type="checkbox"/> None</div> <table><tr><td></td><td></td></tr><tr><td></td><td></td></tr><tr><td></td><td>Click the tab key to add additional rows.</td></tr></table> |                                                                                     |  |  |  |  | Click the tab key to add additional rows. |  |
|                                                    |                                                                                                                                                                                                                                                                                                                                                                                   |                                                                                     |  |  |  |  |                                           |  |
|                                                    |                                                                                                                                                                                                                                                                                                                                                                                   |                                                                                     |  |  |  |  |                                           |  |
|                                                    | Click the tab key to add additional rows.                                                                                                                                                                                                                                                                                                                                         |                                                                                     |  |  |  |  |                                           |  |
| Time frame: past 36 months                         |                                                                                                                                                                                                                                                                                                                                                                                   |                                                                                     |  |  |  |  |                                           |  |
| 2                                                  | <div>Grants or contracts from any entity (if not indicated in item #1 above).</div> <div><input checked="" type="checkbox"/> None</div> <table><tr><td></td><td></td></tr><tr><td></td><td></td></tr><tr><td></td><td></td></tr></table>                                                                                                                                          |                                                                                     |  |  |  |  |                                           |  |
|                                                    |                                                                                                                                                                                                                                                                                                                                                                                   |                                                                                     |  |  |  |  |                                           |  |
|                                                    |                                                                                                                                                                                                                                                                                                                                                                                   |                                                                                     |  |  |  |  |                                           |  |
|                                                    |                                                                                                                                                                                                                                                                                                                                                                                   |                                                                                     |  |  |  |  |                                           |  |
| 3                                                  | <div>Royalties or licenses</div> <div><input checked="" type="checkbox"/> None</div> <table><tr><td></td><td></td></tr><tr><td></td><td></td></tr><tr><td></td><td></td></tr></table>                                                                                                                                                                                             |                                                                                     |  |  |  |  |                                           |  |
|                                                    |                                                                                                                                                                                                                                                                                                                                                                                   |                                                                                     |  |  |  |  |                                           |  |
|                                                    |                                                                                                                                                                                                                                                                                                                                                                                   |                                                                                     |  |  |  |  |                                           |  |
|                                                    |                                                                                                                                                                                                                                                                                                                                                                                   |                                                                                     |  |  |  |  |                                           |  |

|           |                                                                                                              | Name all entities with whom you have this relationship or indicate none (add rows as needed)                                                                                                                                       | Specifications/Comments (e.g., if payments were made to you or to your institution) |                 |      |  |  |  |  |  |  |
|-----------|--------------------------------------------------------------------------------------------------------------|------------------------------------------------------------------------------------------------------------------------------------------------------------------------------------------------------------------------------------|-------------------------------------------------------------------------------------|-----------------|------|--|--|--|--|--|--|
| 4         | Consulting fees                                                                                              | <input checked="" type="checkbox"/> <b>None</b><br><table border="1"> <tr> <td>Medtronic</td> <td>Consulting fees</td> </tr> <tr> <td></td> <td></td> </tr> <tr> <td></td> <td></td> </tr> <tr> <td></td> <td></td> </tr> </table> | Medtronic                                                                           | Consulting fees |      |  |  |  |  |  |  |
| Medtronic | Consulting fees                                                                                              |                                                                                                                                                                                                                                    |                                                                                     |                 |      |  |  |  |  |  |  |
|           |                                                                                                              |                                                                                                                                                                                                                                    |                                                                                     |                 |      |  |  |  |  |  |  |
|           |                                                                                                              |                                                                                                                                                                                                                                    |                                                                                     |                 |      |  |  |  |  |  |  |
|           |                                                                                                              |                                                                                                                                                                                                                                    |                                                                                     |                 |      |  |  |  |  |  |  |
| 5         | Payment or honoraria for lectures, presentations, speakers bureaus, manuscript writing or educational events | <input checked="" type="checkbox"/> <b>None</b><br><table border="1"> <tr> <td></td> <td></td> </tr> <tr> <td></td> <td></td> </tr> <tr> <td></td> <td></td> </tr> </table>                                                        |                                                                                     |                 |      |  |  |  |  |  |  |
|           |                                                                                                              |                                                                                                                                                                                                                                    |                                                                                     |                 |      |  |  |  |  |  |  |
|           |                                                                                                              |                                                                                                                                                                                                                                    |                                                                                     |                 |      |  |  |  |  |  |  |
|           |                                                                                                              |                                                                                                                                                                                                                                    |                                                                                     |                 |      |  |  |  |  |  |  |
| 6         | Payment for expert testimony                                                                                 | <input checked="" type="checkbox"/> <b>None</b><br><table border="1"> <tr> <td></td> <td></td> </tr> <tr> <td></td> <td></td> </tr> <tr> <td></td> <td></td> </tr> </table>                                                        |                                                                                     |                 |      |  |  |  |  |  |  |
|           |                                                                                                              |                                                                                                                                                                                                                                    |                                                                                     |                 |      |  |  |  |  |  |  |
|           |                                                                                                              |                                                                                                                                                                                                                                    |                                                                                     |                 |      |  |  |  |  |  |  |
|           |                                                                                                              |                                                                                                                                                                                                                                    |                                                                                     |                 |      |  |  |  |  |  |  |
| 7         | Support for attending meetings and/or travel                                                                 | <input checked="" type="checkbox"/> <b>None</b><br><table border="1"> <tr> <td></td> <td></td> </tr> <tr> <td></td> <td></td> </tr> <tr> <td></td> <td></td> </tr> </table>                                                        |                                                                                     |                 |      |  |  |  |  |  |  |
|           |                                                                                                              |                                                                                                                                                                                                                                    |                                                                                     |                 |      |  |  |  |  |  |  |
|           |                                                                                                              |                                                                                                                                                                                                                                    |                                                                                     |                 |      |  |  |  |  |  |  |
|           |                                                                                                              |                                                                                                                                                                                                                                    |                                                                                     |                 |      |  |  |  |  |  |  |
| 8         | Patents planned, issued or pending                                                                           | <input checked="" type="checkbox"/> <b>None</b><br><table border="1"> <tr> <td></td> <td></td> </tr> <tr> <td></td> <td></td> </tr> <tr> <td></td> <td></td> </tr> </table>                                                        |                                                                                     |                 |      |  |  |  |  |  |  |
|           |                                                                                                              |                                                                                                                                                                                                                                    |                                                                                     |                 |      |  |  |  |  |  |  |
|           |                                                                                                              |                                                                                                                                                                                                                                    |                                                                                     |                 |      |  |  |  |  |  |  |
|           |                                                                                                              |                                                                                                                                                                                                                                    |                                                                                     |                 |      |  |  |  |  |  |  |
| 9         | Participation on a Data Safety Monitoring Board or Advisory Board                                            | <input checked="" type="checkbox"/> <b>None</b><br><table border="1"> <tr> <td></td> <td></td> </tr> <tr> <td></td> <td></td> </tr> <tr> <td></td> <td></td> </tr> </table>                                                        |                                                                                     |                 |      |  |  |  |  |  |  |
|           |                                                                                                              |                                                                                                                                                                                                                                    |                                                                                     |                 |      |  |  |  |  |  |  |
|           |                                                                                                              |                                                                                                                                                                                                                                    |                                                                                     |                 |      |  |  |  |  |  |  |
|           |                                                                                                              |                                                                                                                                                                                                                                    |                                                                                     |                 |      |  |  |  |  |  |  |
| 10        | Leadership or fiduciary role in other board, society, committee or advocacy group, paid or unpaid            | <input type="checkbox"/> <b>None</b><br><table border="1"> <tr> <td>SNIS</td> <td></td> </tr> <tr> <td>JNIS</td> <td></td> </tr> <tr> <td></td> <td></td> </tr> </table>                                                           | SNIS                                                                                |                 | JNIS |  |  |  |  |  |  |
| SNIS      |                                                                                                              |                                                                                                                                                                                                                                    |                                                                                     |                 |      |  |  |  |  |  |  |
| JNIS      |                                                                                                              |                                                                                                                                                                                                                                    |                                                                                     |                 |      |  |  |  |  |  |  |
|           |                                                                                                              |                                                                                                                                                                                                                                    |                                                                                     |                 |      |  |  |  |  |  |  |

|           |                                                                                  | Name all entities with whom you have this relationship or indicate none (add rows as needed)                                                                       | Specifications/Comments (e.g., if payments were made to you or to your institution) |  |  |  |  |  |  |
|-----------|----------------------------------------------------------------------------------|--------------------------------------------------------------------------------------------------------------------------------------------------------------------|-------------------------------------------------------------------------------------|--|--|--|--|--|--|
| <b>11</b> | Stock or stock options                                                           | <input type="checkbox"/> <b>None</b><br><table border="1"> <tr><td></td><td></td></tr> <tr><td></td><td></td></tr> <tr><td></td><td></td></tr> </table>            |                                                                                     |  |  |  |  |  |  |
|           |                                                                                  |                                                                                                                                                                    |                                                                                     |  |  |  |  |  |  |
|           |                                                                                  |                                                                                                                                                                    |                                                                                     |  |  |  |  |  |  |
|           |                                                                                  |                                                                                                                                                                    |                                                                                     |  |  |  |  |  |  |
| <b>12</b> | Receipt of equipment, materials, drugs, medical writing, gifts or other services | <input type="checkbox"/> <b>None</b><br><table border="1"> <tr><td></td><td></td></tr> <tr><td></td><td></td></tr> <tr><td></td><td></td></tr> </table>            |                                                                                     |  |  |  |  |  |  |
|           |                                                                                  |                                                                                                                                                                    |                                                                                     |  |  |  |  |  |  |
|           |                                                                                  |                                                                                                                                                                    |                                                                                     |  |  |  |  |  |  |
|           |                                                                                  |                                                                                                                                                                    |                                                                                     |  |  |  |  |  |  |
| <b>13</b> | Other financial or non-financial interests                                       | <input checked="" type="checkbox"/> <b>None</b><br><table border="1"> <tr><td></td><td></td></tr> <tr><td></td><td></td></tr> <tr><td></td><td></td></tr> </table> |                                                                                     |  |  |  |  |  |  |
|           |                                                                                  |                                                                                                                                                                    |                                                                                     |  |  |  |  |  |  |
|           |                                                                                  |                                                                                                                                                                    |                                                                                     |  |  |  |  |  |  |
|           |                                                                                  |                                                                                                                                                                    |                                                                                     |  |  |  |  |  |  |

**Please place an "X" next to the following statement to indicate your agreement:**

☒ I certify that I have answered every question and have not altered the wording of any of the questions on this form.

## ICMJE DISCLOSURE FORM

**Date:** 1/24/2022

**Your Name:** Osama O Zaidat

**Manuscript Title:** Prospective Study on Embolization of Intracranial Aneurysms with the Pipeline Device (PREMIER study): 3-year results with the application of a flow diverter-specific occlusion classification

**Manuscript Number (if known):** neurintsurg-2021-018501

In the interest of transparency, we ask you to disclose all relationships/activities/interests listed below that are related to the content of your manuscript. "Related" means any relation with for-profit or not-for-profit third parties whose interests may be affected by the content of the manuscript. Disclosure represents a commitment to transparency and does not necessarily indicate a bias. If you are in doubt about whether to list a relationship/activity/interest, it is preferable that you do so.

The author's relationships/activities/interests should be defined broadly. For example, if your manuscript pertains to the epidemiology of hypertension, you should declare all relationships with manufacturers of antihypertensive medication, even if that medication is not mentioned in the manuscript.

In item #1 below, report all support for the work reported in this manuscript without time limit. For all other items, the time frame for disclosure is the past 36 months.

|                                                           | Name all entities with whom you have this relationship or indicate none (add rows as needed)                                                                                   | Specifications/Comments (e.g., if payments were made to you or to your institution)                                                                                                                                                                       |                   |                                                       |              |         |  |                                           |
|-----------------------------------------------------------|--------------------------------------------------------------------------------------------------------------------------------------------------------------------------------|-----------------------------------------------------------------------------------------------------------------------------------------------------------------------------------------------------------------------------------------------------------|-------------------|-------------------------------------------------------|--------------|---------|--|-------------------------------------------|
| <b>Time frame: Since the initial planning of the work</b> |                                                                                                                                                                                |                                                                                                                                                                                                                                                           |                   |                                                       |              |         |  |                                           |
| <b>1</b>                                                  | All support for the present manuscript (e.g., funding, provision of study materials, medical writing, article processing charges, etc.)<br><b>No time limit for this item.</b> | <input checked="" type="checkbox"/> <b>None</b><br><table border="1"> <tr><td></td><td></td></tr> <tr><td></td><td></td></tr> <tr><td></td><td>Click the tab key to add additional rows.</td></tr> </table>                                               |                   |                                                       |              |         |  | Click the tab key to add additional rows. |
|                                                           |                                                                                                                                                                                |                                                                                                                                                                                                                                                           |                   |                                                       |              |         |  |                                           |
|                                                           |                                                                                                                                                                                |                                                                                                                                                                                                                                                           |                   |                                                       |              |         |  |                                           |
|                                                           | Click the tab key to add additional rows.                                                                                                                                      |                                                                                                                                                                                                                                                           |                   |                                                       |              |         |  |                                           |
| <b>Time frame: past 36 months</b>                         |                                                                                                                                                                                |                                                                                                                                                                                                                                                           |                   |                                                       |              |         |  |                                           |
| <b>2</b>                                                  | Grants or contracts from any entity (if not indicated in item #1 above).                                                                                                       | <input type="checkbox"/> <b>None</b><br><table border="1"> <tr> <td>TESLA Trial Grant</td> <td>Stryker, Penumbra, Medtronic, Cerenovus and Genentech</td> </tr> <tr> <td>Target study</td> <td>Stryker</td> </tr> <tr> <td></td> <td></td> </tr> </table> | TESLA Trial Grant | Stryker, Penumbra, Medtronic, Cerenovus and Genentech | Target study | Stryker |  |                                           |
| TESLA Trial Grant                                         | Stryker, Penumbra, Medtronic, Cerenovus and Genentech                                                                                                                          |                                                                                                                                                                                                                                                           |                   |                                                       |              |         |  |                                           |
| Target study                                              | Stryker                                                                                                                                                                        |                                                                                                                                                                                                                                                           |                   |                                                       |              |         |  |                                           |
|                                                           |                                                                                                                                                                                |                                                                                                                                                                                                                                                           |                   |                                                       |              |         |  |                                           |
| <b>3</b>                                                  | Royalties or licenses                                                                                                                                                          | <input checked="" type="checkbox"/> <b>None</b><br><table border="1"> <tr><td></td><td></td></tr> <tr><td></td><td></td></tr> <tr><td></td><td></td></tr> </table>                                                                                        |                   |                                                       |              |         |  |                                           |
|                                                           |                                                                                                                                                                                |                                                                                                                                                                                                                                                           |                   |                                                       |              |         |  |                                           |
|                                                           |                                                                                                                                                                                |                                                                                                                                                                                                                                                           |                   |                                                       |              |         |  |                                           |
|                                                           |                                                                                                                                                                                |                                                                                                                                                                                                                                                           |                   |                                                       |              |         |  |                                           |

|                           |                                                                                                              | Name all entities with whom you have this relationship or indicate none (add rows as needed)                                                                                                                                                           | Specifications/Comments (e.g., if payments were made to you or to your institution) |                   |                           |            |                       |            |            |            |  |
|---------------------------|--------------------------------------------------------------------------------------------------------------|--------------------------------------------------------------------------------------------------------------------------------------------------------------------------------------------------------------------------------------------------------|-------------------------------------------------------------------------------------|-------------------|---------------------------|------------|-----------------------|------------|------------|------------|--|
| 4                         | Consulting fees                                                                                              | <input type="checkbox"/> None<br><table border="1"> <tr><td>Medtronic</td><td>Consulting</td></tr> <tr><td>Stryker</td><td>Consulting</td></tr> <tr><td>Penumbra</td><td>Consulting</td></tr> <tr><td>Cerenovous</td><td>Consulting</td></tr> </table> | Medtronic                                                                           | Consulting        | Stryker                   | Consulting | Penumbra              | Consulting | Cerenovous | Consulting |  |
| Medtronic                 | Consulting                                                                                                   |                                                                                                                                                                                                                                                        |                                                                                     |                   |                           |            |                       |            |            |            |  |
| Stryker                   | Consulting                                                                                                   |                                                                                                                                                                                                                                                        |                                                                                     |                   |                           |            |                       |            |            |            |  |
| Penumbra                  | Consulting                                                                                                   |                                                                                                                                                                                                                                                        |                                                                                     |                   |                           |            |                       |            |            |            |  |
| Cerenovous                | Consulting                                                                                                   |                                                                                                                                                                                                                                                        |                                                                                     |                   |                           |            |                       |            |            |            |  |
| 5                         | Payment or honoraria for lectures, presentations, speakers bureaus, manuscript writing or educational events | <input type="checkbox"/> None<br><table border="1"> <tr><td>Medtronic</td><td>Consulting</td></tr> <tr><td>Stryker</td><td>Consulting</td></tr> <tr><td>Penumbra</td><td>Consulting</td></tr> <tr><td>Cerenovous</td><td>Consulting</td></tr> </table> | Medtronic                                                                           | Consulting        | Stryker                   | Consulting | Penumbra              | Consulting | Cerenovous | Consulting |  |
| Medtronic                 | Consulting                                                                                                   |                                                                                                                                                                                                                                                        |                                                                                     |                   |                           |            |                       |            |            |            |  |
| Stryker                   | Consulting                                                                                                   |                                                                                                                                                                                                                                                        |                                                                                     |                   |                           |            |                       |            |            |            |  |
| Penumbra                  | Consulting                                                                                                   |                                                                                                                                                                                                                                                        |                                                                                     |                   |                           |            |                       |            |            |            |  |
| Cerenovous                | Consulting                                                                                                   |                                                                                                                                                                                                                                                        |                                                                                     |                   |                           |            |                       |            |            |            |  |
| 6                         | Payment for expert testimony                                                                                 | <input checked="" type="checkbox"/> None<br><table border="1"> <tr><td></td><td></td></tr> <tr><td></td><td></td></tr> <tr><td></td><td></td></tr> </table>                                                                                            |                                                                                     |                   |                           |            |                       |            |            |            |  |
|                           |                                                                                                              |                                                                                                                                                                                                                                                        |                                                                                     |                   |                           |            |                       |            |            |            |  |
|                           |                                                                                                              |                                                                                                                                                                                                                                                        |                                                                                     |                   |                           |            |                       |            |            |            |  |
|                           |                                                                                                              |                                                                                                                                                                                                                                                        |                                                                                     |                   |                           |            |                       |            |            |            |  |
| 7                         | Support for attending meetings and/or travel                                                                 | <input checked="" type="checkbox"/> None<br><table border="1"> <tr><td></td><td></td></tr> <tr><td></td><td></td></tr> <tr><td></td><td></td></tr> </table>                                                                                            |                                                                                     |                   |                           |            |                       |            |            |            |  |
|                           |                                                                                                              |                                                                                                                                                                                                                                                        |                                                                                     |                   |                           |            |                       |            |            |            |  |
|                           |                                                                                                              |                                                                                                                                                                                                                                                        |                                                                                     |                   |                           |            |                       |            |            |            |  |
|                           |                                                                                                              |                                                                                                                                                                                                                                                        |                                                                                     |                   |                           |            |                       |            |            |            |  |
| 8                         | Patents planned, issued or pending                                                                           | <input type="checkbox"/> None<br><table border="1"> <tr><td>Aneurysm device</td><td></td></tr> <tr><td>Stroke device</td><td></td></tr> <tr><td></td><td></td></tr> </table>                                                                           | Aneurysm device                                                                     |                   | Stroke device             |            |                       |            |            |            |  |
| Aneurysm device           |                                                                                                              |                                                                                                                                                                                                                                                        |                                                                                     |                   |                           |            |                       |            |            |            |  |
| Stroke device             |                                                                                                              |                                                                                                                                                                                                                                                        |                                                                                     |                   |                           |            |                       |            |            |            |  |
|                           |                                                                                                              |                                                                                                                                                                                                                                                        |                                                                                     |                   |                           |            |                       |            |            |            |  |
| 9                         | Participation on a Data Safety Monitoring Board or Advisory Board                                            | <input type="checkbox"/> None<br><table border="1"> <tr><td>Premier DSMB</td><td>Chair of the DSMB</td></tr> <tr><td></td><td></td></tr> <tr><td></td><td></td></tr> </table>                                                                          | Premier DSMB                                                                        | Chair of the DSMB |                           |            |                       |            |            |            |  |
| Premier DSMB              | Chair of the DSMB                                                                                            |                                                                                                                                                                                                                                                        |                                                                                     |                   |                           |            |                       |            |            |            |  |
|                           |                                                                                                              |                                                                                                                                                                                                                                                        |                                                                                     |                   |                           |            |                       |            |            |            |  |
|                           |                                                                                                              |                                                                                                                                                                                                                                                        |                                                                                     |                   |                           |            |                       |            |            |            |  |
| 10                        | Leadership or fiduciary role in other board, society, committee or advocacy group, paid or unpaid            | <input type="checkbox"/> None<br><table border="1"> <tr><td>SVIN Education committee</td><td></td></tr> <tr><td>SVIN Guidelines committee</td><td></td></tr> <tr><td>SVIN Annual Committee</td><td></td></tr> </table>                                 | SVIN Education committee                                                            |                   | SVIN Guidelines committee |            | SVIN Annual Committee |            |            |            |  |
| SVIN Education committee  |                                                                                                              |                                                                                                                                                                                                                                                        |                                                                                     |                   |                           |            |                       |            |            |            |  |
| SVIN Guidelines committee |                                                                                                              |                                                                                                                                                                                                                                                        |                                                                                     |                   |                           |            |                       |            |            |            |  |
| SVIN Annual Committee     |                                                                                                              |                                                                                                                                                                                                                                                        |                                                                                     |                   |                           |            |                       |            |            |            |  |

|                                                                                                                                                                                                                                                               |                                                                                  | Name all entities with whom you have this relationship or indicate none (add rows as needed)                                                                                                    | Specifications/Comments (e.g., if payments were made to you or to your institution) |  |  |  |  |  |  |
|---------------------------------------------------------------------------------------------------------------------------------------------------------------------------------------------------------------------------------------------------------------|----------------------------------------------------------------------------------|-------------------------------------------------------------------------------------------------------------------------------------------------------------------------------------------------|-------------------------------------------------------------------------------------|--|--|--|--|--|--|
| <b>11</b>                                                                                                                                                                                                                                                     | Stock or stock options                                                           | <input checked="" type="checkbox"/> <b>None</b><br><table border="1" data-bbox="415 342 1437 434"> <tr><td></td><td></td></tr> <tr><td></td><td></td></tr> <tr><td></td><td></td></tr> </table> |                                                                                     |  |  |  |  |  |  |
|                                                                                                                                                                                                                                                               |                                                                                  |                                                                                                                                                                                                 |                                                                                     |  |  |  |  |  |  |
|                                                                                                                                                                                                                                                               |                                                                                  |                                                                                                                                                                                                 |                                                                                     |  |  |  |  |  |  |
|                                                                                                                                                                                                                                                               |                                                                                  |                                                                                                                                                                                                 |                                                                                     |  |  |  |  |  |  |
| <b>12</b>                                                                                                                                                                                                                                                     | Receipt of equipment, materials, drugs, medical writing, gifts or other services | <input checked="" type="checkbox"/> <b>None</b><br><table border="1" data-bbox="415 537 1437 630"> <tr><td></td><td></td></tr> <tr><td></td><td></td></tr> <tr><td></td><td></td></tr> </table> |                                                                                     |  |  |  |  |  |  |
|                                                                                                                                                                                                                                                               |                                                                                  |                                                                                                                                                                                                 |                                                                                     |  |  |  |  |  |  |
|                                                                                                                                                                                                                                                               |                                                                                  |                                                                                                                                                                                                 |                                                                                     |  |  |  |  |  |  |
|                                                                                                                                                                                                                                                               |                                                                                  |                                                                                                                                                                                                 |                                                                                     |  |  |  |  |  |  |
| <b>13</b>                                                                                                                                                                                                                                                     | Other financial or non-financial interests                                       | <input checked="" type="checkbox"/> <b>None</b><br><table border="1" data-bbox="415 730 1437 823"> <tr><td></td><td></td></tr> <tr><td></td><td></td></tr> <tr><td></td><td></td></tr> </table> |                                                                                     |  |  |  |  |  |  |
|                                                                                                                                                                                                                                                               |                                                                                  |                                                                                                                                                                                                 |                                                                                     |  |  |  |  |  |  |
|                                                                                                                                                                                                                                                               |                                                                                  |                                                                                                                                                                                                 |                                                                                     |  |  |  |  |  |  |
|                                                                                                                                                                                                                                                               |                                                                                  |                                                                                                                                                                                                 |                                                                                     |  |  |  |  |  |  |
| <p><b>Please place an "X" next to the following statement to indicate your agreement:</b></p> <p><input checked="" type="checkbox"/> I certify that I have answered every question and have not altered the wording of any of the questions on this form.</p> |                                                                                  |                                                                                                                                                                                                 |                                                                                     |  |  |  |  |  |  |



## ICMJE DISCLOSURE FORM

**Date:** 1/19/2022

**Your Name:** Orlando Diaz

**Manuscript Title:** Prospective Study on Embolization of Intracranial Aneurysms with the Pipeline Device (PREMIER study): 3-year results with the application of a flow diverter-specific occlusion classification

**Manuscript Number (if known):** neurintsurg-2021-018501

In the interest of transparency, we ask you to disclose all relationships/activities/interests listed below that are related to the content of your manuscript. "Related" means any relation with for-profit or not-for-profit third parties whose interests may be affected by the content of the manuscript. Disclosure represents a commitment to transparency and does not necessarily indicate a bias. If you are in doubt about whether to list a relationship/activity/interest, it is preferable that you do so.

The author's relationships/activities/interests should be defined broadly. For example, if your manuscript pertains to the epidemiology of hypertension, you should declare all relationships with manufacturers of antihypertensive medication, even if that medication is not mentioned in the manuscript.

In item #1 below, report all support for the work reported in this manuscript without time limit. For all other items, the time frame for disclosure is the past 36 months.

|                                                           | Name all entities with whom you have this relationship or indicate none (add rows as needed)                                                                                   | Specifications/Comments (e.g., if payments were made to you or to your institution)                                                                                                                          |  |  |  |  |  |  |
|-----------------------------------------------------------|--------------------------------------------------------------------------------------------------------------------------------------------------------------------------------|--------------------------------------------------------------------------------------------------------------------------------------------------------------------------------------------------------------|--|--|--|--|--|--|
| <b>Time frame: Since the initial planning of the work</b> |                                                                                                                                                                                |                                                                                                                                                                                                              |  |  |  |  |  |  |
| <b>1</b>                                                  | All support for the present manuscript (e.g., funding, provision of study materials, medical writing, article processing charges, etc.)<br><b>No time limit for this item.</b> | <input checked="" type="checkbox"/> <b>None</b><br><table border="1"> <tr><td></td><td></td></tr> <tr><td></td><td></td></tr> <tr><td></td><td></td></tr> </table> Click the tab key to add additional rows. |  |  |  |  |  |  |
|                                                           |                                                                                                                                                                                |                                                                                                                                                                                                              |  |  |  |  |  |  |
|                                                           |                                                                                                                                                                                |                                                                                                                                                                                                              |  |  |  |  |  |  |
|                                                           |                                                                                                                                                                                |                                                                                                                                                                                                              |  |  |  |  |  |  |
| <b>Time frame: past 36 months</b>                         |                                                                                                                                                                                |                                                                                                                                                                                                              |  |  |  |  |  |  |
| <b>2</b>                                                  | Grants or contracts from any entity (if not indicated in item #1 above).                                                                                                       | <input checked="" type="checkbox"/> <b>None</b><br><table border="1"> <tr><td></td><td></td></tr> <tr><td></td><td></td></tr> <tr><td></td><td></td></tr> </table>                                           |  |  |  |  |  |  |
|                                                           |                                                                                                                                                                                |                                                                                                                                                                                                              |  |  |  |  |  |  |
|                                                           |                                                                                                                                                                                |                                                                                                                                                                                                              |  |  |  |  |  |  |
|                                                           |                                                                                                                                                                                |                                                                                                                                                                                                              |  |  |  |  |  |  |
| <b>3</b>                                                  | Royalties or licenses                                                                                                                                                          | <input checked="" type="checkbox"/> <b>None</b><br><table border="1"> <tr><td></td><td></td></tr> <tr><td></td><td></td></tr> <tr><td></td><td></td></tr> </table>                                           |  |  |  |  |  |  |
|                                                           |                                                                                                                                                                                |                                                                                                                                                                                                              |  |  |  |  |  |  |
|                                                           |                                                                                                                                                                                |                                                                                                                                                                                                              |  |  |  |  |  |  |
|                                                           |                                                                                                                                                                                |                                                                                                                                                                                                              |  |  |  |  |  |  |

|    |                                                                                                              | Name all entities with whom you have this relationship or indicate none (add rows as needed)                                                                                                   | Specifications/Comments (e.g., if payments were made to you or to your institution) |  |  |  |  |  |  |  |  |
|----|--------------------------------------------------------------------------------------------------------------|------------------------------------------------------------------------------------------------------------------------------------------------------------------------------------------------|-------------------------------------------------------------------------------------|--|--|--|--|--|--|--|--|
| 4  | Consulting fees                                                                                              | <input checked="" type="checkbox"/> <b>None</b><br><table border="1"> <tr><td></td><td></td></tr> <tr><td></td><td></td></tr> <tr><td></td><td></td></tr> <tr><td></td><td></td></tr> </table> |                                                                                     |  |  |  |  |  |  |  |  |
|    |                                                                                                              |                                                                                                                                                                                                |                                                                                     |  |  |  |  |  |  |  |  |
|    |                                                                                                              |                                                                                                                                                                                                |                                                                                     |  |  |  |  |  |  |  |  |
|    |                                                                                                              |                                                                                                                                                                                                |                                                                                     |  |  |  |  |  |  |  |  |
|    |                                                                                                              |                                                                                                                                                                                                |                                                                                     |  |  |  |  |  |  |  |  |
| 5  | Payment or honoraria for lectures, presentations, speakers bureaus, manuscript writing or educational events | <input checked="" type="checkbox"/> <b>None</b><br><table border="1"> <tr><td></td><td></td></tr> <tr><td></td><td></td></tr> <tr><td></td><td></td></tr> </table>                             |                                                                                     |  |  |  |  |  |  |  |  |
|    |                                                                                                              |                                                                                                                                                                                                |                                                                                     |  |  |  |  |  |  |  |  |
|    |                                                                                                              |                                                                                                                                                                                                |                                                                                     |  |  |  |  |  |  |  |  |
|    |                                                                                                              |                                                                                                                                                                                                |                                                                                     |  |  |  |  |  |  |  |  |
| 6  | Payment for expert testimony                                                                                 | <input checked="" type="checkbox"/> <b>None</b><br><table border="1"> <tr><td></td><td></td></tr> <tr><td></td><td></td></tr> <tr><td></td><td></td></tr> </table>                             |                                                                                     |  |  |  |  |  |  |  |  |
|    |                                                                                                              |                                                                                                                                                                                                |                                                                                     |  |  |  |  |  |  |  |  |
|    |                                                                                                              |                                                                                                                                                                                                |                                                                                     |  |  |  |  |  |  |  |  |
|    |                                                                                                              |                                                                                                                                                                                                |                                                                                     |  |  |  |  |  |  |  |  |
| 7  | Support for attending meetings and/or travel                                                                 | <input type="checkbox"/> <b>None</b><br><table border="1"> <tr><td></td><td></td></tr> <tr><td></td><td></td></tr> <tr><td></td><td></td></tr> </table>                                        |                                                                                     |  |  |  |  |  |  |  |  |
|    |                                                                                                              |                                                                                                                                                                                                |                                                                                     |  |  |  |  |  |  |  |  |
|    |                                                                                                              |                                                                                                                                                                                                |                                                                                     |  |  |  |  |  |  |  |  |
|    |                                                                                                              |                                                                                                                                                                                                |                                                                                     |  |  |  |  |  |  |  |  |
| 8  | Patents planned, issued or pending                                                                           | <input checked="" type="checkbox"/> <b>None</b><br><table border="1"> <tr><td></td><td></td></tr> <tr><td></td><td></td></tr> <tr><td></td><td></td></tr> </table>                             |                                                                                     |  |  |  |  |  |  |  |  |
|    |                                                                                                              |                                                                                                                                                                                                |                                                                                     |  |  |  |  |  |  |  |  |
|    |                                                                                                              |                                                                                                                                                                                                |                                                                                     |  |  |  |  |  |  |  |  |
|    |                                                                                                              |                                                                                                                                                                                                |                                                                                     |  |  |  |  |  |  |  |  |
| 9  | Participation on a Data Safety Monitoring Board or Advisory Board                                            | <input checked="" type="checkbox"/> <b>None</b><br><table border="1"> <tr><td></td><td></td></tr> <tr><td></td><td></td></tr> <tr><td></td><td></td></tr> </table>                             |                                                                                     |  |  |  |  |  |  |  |  |
|    |                                                                                                              |                                                                                                                                                                                                |                                                                                     |  |  |  |  |  |  |  |  |
|    |                                                                                                              |                                                                                                                                                                                                |                                                                                     |  |  |  |  |  |  |  |  |
|    |                                                                                                              |                                                                                                                                                                                                |                                                                                     |  |  |  |  |  |  |  |  |
| 10 | Leadership or fiduciary role in other board, society, committee or advocacy group, paid or unpaid            | <input checked="" type="checkbox"/> <b>None</b><br><table border="1"> <tr><td></td><td></td></tr> <tr><td></td><td></td></tr> <tr><td></td><td></td></tr> </table>                             |                                                                                     |  |  |  |  |  |  |  |  |
|    |                                                                                                              |                                                                                                                                                                                                |                                                                                     |  |  |  |  |  |  |  |  |
|    |                                                                                                              |                                                                                                                                                                                                |                                                                                     |  |  |  |  |  |  |  |  |
|    |                                                                                                              |                                                                                                                                                                                                |                                                                                     |  |  |  |  |  |  |  |  |

|                                                                                                                                                                                                                                                               |                                                                                  | Name all entities with whom you have this relationship or indicate none (add rows as needed)                                                                                                    | Specifications/Comments (e.g., if payments were made to you or to your institution) |  |  |  |  |  |  |
|---------------------------------------------------------------------------------------------------------------------------------------------------------------------------------------------------------------------------------------------------------------|----------------------------------------------------------------------------------|-------------------------------------------------------------------------------------------------------------------------------------------------------------------------------------------------|-------------------------------------------------------------------------------------|--|--|--|--|--|--|
| <b>11</b>                                                                                                                                                                                                                                                     | Stock or stock options                                                           | <input checked="" type="checkbox"/> <b>None</b><br><table border="1" data-bbox="415 342 1437 434"> <tr><td></td><td></td></tr> <tr><td></td><td></td></tr> <tr><td></td><td></td></tr> </table> |                                                                                     |  |  |  |  |  |  |
|                                                                                                                                                                                                                                                               |                                                                                  |                                                                                                                                                                                                 |                                                                                     |  |  |  |  |  |  |
|                                                                                                                                                                                                                                                               |                                                                                  |                                                                                                                                                                                                 |                                                                                     |  |  |  |  |  |  |
|                                                                                                                                                                                                                                                               |                                                                                  |                                                                                                                                                                                                 |                                                                                     |  |  |  |  |  |  |
| <b>12</b>                                                                                                                                                                                                                                                     | Receipt of equipment, materials, drugs, medical writing, gifts or other services | <input checked="" type="checkbox"/> <b>None</b><br><table border="1" data-bbox="415 537 1437 630"> <tr><td></td><td></td></tr> <tr><td></td><td></td></tr> <tr><td></td><td></td></tr> </table> |                                                                                     |  |  |  |  |  |  |
|                                                                                                                                                                                                                                                               |                                                                                  |                                                                                                                                                                                                 |                                                                                     |  |  |  |  |  |  |
|                                                                                                                                                                                                                                                               |                                                                                  |                                                                                                                                                                                                 |                                                                                     |  |  |  |  |  |  |
|                                                                                                                                                                                                                                                               |                                                                                  |                                                                                                                                                                                                 |                                                                                     |  |  |  |  |  |  |
| <b>13</b>                                                                                                                                                                                                                                                     | Other financial or non-financial interests                                       | <input checked="" type="checkbox"/> <b>None</b><br><table border="1" data-bbox="415 730 1437 823"> <tr><td></td><td></td></tr> <tr><td></td><td></td></tr> <tr><td></td><td></td></tr> </table> |                                                                                     |  |  |  |  |  |  |
|                                                                                                                                                                                                                                                               |                                                                                  |                                                                                                                                                                                                 |                                                                                     |  |  |  |  |  |  |
|                                                                                                                                                                                                                                                               |                                                                                  |                                                                                                                                                                                                 |                                                                                     |  |  |  |  |  |  |
|                                                                                                                                                                                                                                                               |                                                                                  |                                                                                                                                                                                                 |                                                                                     |  |  |  |  |  |  |
| <p><b>Please place an "X" next to the following statement to indicate your agreement:</b></p> <p><input checked="" type="checkbox"/> I certify that I have answered every question and have not altered the wording of any of the questions on this form.</p> |                                                                                  |                                                                                                                                                                                                 |                                                                                     |  |  |  |  |  |  |

## ICMJE DISCLOSURE FORM

**Date:** 1/14/2022

**Your Name:** Pascal Jabbour

**Manuscript Title:** Prospective Study on Embolization of Intracranial Aneurysms with the Pipeline Device (PREMIER study): 3-year results with the application of a flow diverter-specific occlusion classification

**Manuscript Number (if known):** neurintsurg-2021-018501

In the interest of transparency, we ask you to disclose all relationships/activities/interests listed below that are related to the content of your manuscript. "Related" means any relation with for-profit or not-for-profit third parties whose interests may be affected by the content of the manuscript. Disclosure represents a commitment to transparency and does not necessarily indicate a bias. If you are in doubt about whether to list a relationship/activity/interest, it is preferable that you do so.

The author's relationships/activities/interests should be defined broadly. For example, if your manuscript pertains to the epidemiology of hypertension, you should declare all relationships with manufacturers of antihypertensive medication, even if that medication is not mentioned in the manuscript.

In item #1 below, report all support for the work reported in this manuscript without time limit. For all other items, the time frame for disclosure is the past 36 months.

|                                                    |                                                                                                                                                                                | Name all entities with whom you have this relationship or indicate none (add rows as needed)                                                                                                                                                                                                                                                                                                     | Specifications/Comments (e.g., if payments were made to you or to your institution) |                                      |  |  |  |  |  |
|----------------------------------------------------|--------------------------------------------------------------------------------------------------------------------------------------------------------------------------------|--------------------------------------------------------------------------------------------------------------------------------------------------------------------------------------------------------------------------------------------------------------------------------------------------------------------------------------------------------------------------------------------------|-------------------------------------------------------------------------------------|--------------------------------------|--|--|--|--|--|
| Time frame: Since the initial planning of the work |                                                                                                                                                                                |                                                                                                                                                                                                                                                                                                                                                                                                  |                                                                                     |                                      |  |  |  |  |  |
| 1                                                  | All support for the present manuscript (e.g., funding, provision of study materials, medical writing, article processing charges, etc.)<br><b>No time limit for this item.</b> | <input checked="" type="checkbox"/> <b>None</b><br><table border="1" style="width: 100%; border-collapse: collapse; margin-top: 5px;"> <tr><td style="height: 20px;"></td><td style="height: 20px;"></td></tr> <tr><td style="height: 20px;"></td><td style="height: 20px;"></td></tr> <tr><td style="height: 20px;"></td><td style="height: 20px;"></td></tr> </table>                          |                                                                                     |                                      |  |  |  |  |  |
|                                                    |                                                                                                                                                                                |                                                                                                                                                                                                                                                                                                                                                                                                  |                                                                                     |                                      |  |  |  |  |  |
|                                                    |                                                                                                                                                                                |                                                                                                                                                                                                                                                                                                                                                                                                  |                                                                                     |                                      |  |  |  |  |  |
|                                                    |                                                                                                                                                                                |                                                                                                                                                                                                                                                                                                                                                                                                  |                                                                                     |                                      |  |  |  |  |  |
| Time frame: past 36 months                         |                                                                                                                                                                                |                                                                                                                                                                                                                                                                                                                                                                                                  |                                                                                     |                                      |  |  |  |  |  |
| 2                                                  | Grants or contracts from any entity (if not indicated in item #1 above).                                                                                                       | <input type="checkbox"/> <b>None</b><br><table border="1" style="width: 100%; border-collapse: collapse; margin-top: 5px;"> <tr><td style="height: 20px;">Medtronic , Cerenovus , Microvention</td><td style="height: 20px;"></td></tr> <tr><td style="height: 20px;"></td><td style="height: 20px;"></td></tr> <tr><td style="height: 20px;"></td><td style="height: 20px;"></td></tr> </table> |                                                                                     | Medtronic , Cerenovus , Microvention |  |  |  |  |  |
| Medtronic , Cerenovus , Microvention               |                                                                                                                                                                                |                                                                                                                                                                                                                                                                                                                                                                                                  |                                                                                     |                                      |  |  |  |  |  |
|                                                    |                                                                                                                                                                                |                                                                                                                                                                                                                                                                                                                                                                                                  |                                                                                     |                                      |  |  |  |  |  |
|                                                    |                                                                                                                                                                                |                                                                                                                                                                                                                                                                                                                                                                                                  |                                                                                     |                                      |  |  |  |  |  |
| 3                                                  | Royalties or licenses                                                                                                                                                          | <input checked="" type="checkbox"/> <b>None</b><br><table border="1" style="width: 100%; border-collapse: collapse; margin-top: 5px;"> <tr><td style="height: 20px;"></td><td style="height: 20px;"></td></tr> <tr><td style="height: 20px;"></td><td style="height: 20px;"></td></tr> <tr><td style="height: 20px;"></td><td style="height: 20px;"></td></tr> </table>                          |                                                                                     |                                      |  |  |  |  |  |
|                                                    |                                                                                                                                                                                |                                                                                                                                                                                                                                                                                                                                                                                                  |                                                                                     |                                      |  |  |  |  |  |
|                                                    |                                                                                                                                                                                |                                                                                                                                                                                                                                                                                                                                                                                                  |                                                                                     |                                      |  |  |  |  |  |
|                                                    |                                                                                                                                                                                |                                                                                                                                                                                                                                                                                                                                                                                                  |                                                                                     |                                      |  |  |  |  |  |

|    |                                                                                                              | Name all entities with whom you have this relationship or indicate none (add rows as needed)                                                                                                   | Specifications/Comments (e.g., if payments were made to you or to your institution) |  |  |  |  |  |  |  |  |
|----|--------------------------------------------------------------------------------------------------------------|------------------------------------------------------------------------------------------------------------------------------------------------------------------------------------------------|-------------------------------------------------------------------------------------|--|--|--|--|--|--|--|--|
| 4  | Consulting fees                                                                                              | <input checked="" type="checkbox"/> <b>None</b><br><table border="1"> <tr><td></td><td></td></tr> <tr><td></td><td></td></tr> <tr><td></td><td></td></tr> <tr><td></td><td></td></tr> </table> |                                                                                     |  |  |  |  |  |  |  |  |
|    |                                                                                                              |                                                                                                                                                                                                |                                                                                     |  |  |  |  |  |  |  |  |
|    |                                                                                                              |                                                                                                                                                                                                |                                                                                     |  |  |  |  |  |  |  |  |
|    |                                                                                                              |                                                                                                                                                                                                |                                                                                     |  |  |  |  |  |  |  |  |
|    |                                                                                                              |                                                                                                                                                                                                |                                                                                     |  |  |  |  |  |  |  |  |
| 5  | Payment or honoraria for lectures, presentations, speakers bureaus, manuscript writing or educational events | <input checked="" type="checkbox"/> <b>None</b><br><table border="1"> <tr><td></td><td></td></tr> <tr><td></td><td></td></tr> <tr><td></td><td></td></tr> </table>                             |                                                                                     |  |  |  |  |  |  |  |  |
|    |                                                                                                              |                                                                                                                                                                                                |                                                                                     |  |  |  |  |  |  |  |  |
|    |                                                                                                              |                                                                                                                                                                                                |                                                                                     |  |  |  |  |  |  |  |  |
|    |                                                                                                              |                                                                                                                                                                                                |                                                                                     |  |  |  |  |  |  |  |  |
| 6  | Payment for expert testimony                                                                                 | <input checked="" type="checkbox"/> <b>None</b><br><table border="1"> <tr><td></td><td></td></tr> <tr><td></td><td></td></tr> <tr><td></td><td></td></tr> </table>                             |                                                                                     |  |  |  |  |  |  |  |  |
|    |                                                                                                              |                                                                                                                                                                                                |                                                                                     |  |  |  |  |  |  |  |  |
|    |                                                                                                              |                                                                                                                                                                                                |                                                                                     |  |  |  |  |  |  |  |  |
|    |                                                                                                              |                                                                                                                                                                                                |                                                                                     |  |  |  |  |  |  |  |  |
| 7  | Support for attending meetings and/or travel                                                                 | <input checked="" type="checkbox"/> <b>None</b><br><table border="1"> <tr><td></td><td></td></tr> <tr><td></td><td></td></tr> <tr><td></td><td></td></tr> </table>                             |                                                                                     |  |  |  |  |  |  |  |  |
|    |                                                                                                              |                                                                                                                                                                                                |                                                                                     |  |  |  |  |  |  |  |  |
|    |                                                                                                              |                                                                                                                                                                                                |                                                                                     |  |  |  |  |  |  |  |  |
|    |                                                                                                              |                                                                                                                                                                                                |                                                                                     |  |  |  |  |  |  |  |  |
| 8  | Patents planned, issued or pending                                                                           | <input checked="" type="checkbox"/> <b>None</b><br><table border="1"> <tr><td></td><td></td></tr> <tr><td></td><td></td></tr> <tr><td></td><td></td></tr> </table>                             |                                                                                     |  |  |  |  |  |  |  |  |
|    |                                                                                                              |                                                                                                                                                                                                |                                                                                     |  |  |  |  |  |  |  |  |
|    |                                                                                                              |                                                                                                                                                                                                |                                                                                     |  |  |  |  |  |  |  |  |
|    |                                                                                                              |                                                                                                                                                                                                |                                                                                     |  |  |  |  |  |  |  |  |
| 9  | Participation on a Data Safety Monitoring Board or Advisory Board                                            | <input checked="" type="checkbox"/> <b>None</b><br><table border="1"> <tr><td></td><td></td></tr> <tr><td></td><td></td></tr> <tr><td></td><td></td></tr> </table>                             |                                                                                     |  |  |  |  |  |  |  |  |
|    |                                                                                                              |                                                                                                                                                                                                |                                                                                     |  |  |  |  |  |  |  |  |
|    |                                                                                                              |                                                                                                                                                                                                |                                                                                     |  |  |  |  |  |  |  |  |
|    |                                                                                                              |                                                                                                                                                                                                |                                                                                     |  |  |  |  |  |  |  |  |
| 10 | Leadership or fiduciary role in other board, society, committee or advocacy group, paid or unpaid            | <input checked="" type="checkbox"/> <b>None</b><br><table border="1"> <tr><td></td><td></td></tr> <tr><td></td><td></td></tr> <tr><td></td><td></td></tr> </table>                             |                                                                                     |  |  |  |  |  |  |  |  |
|    |                                                                                                              |                                                                                                                                                                                                |                                                                                     |  |  |  |  |  |  |  |  |
|    |                                                                                                              |                                                                                                                                                                                                |                                                                                     |  |  |  |  |  |  |  |  |
|    |                                                                                                              |                                                                                                                                                                                                |                                                                                     |  |  |  |  |  |  |  |  |

|           |                                                                                  | Name all entities with whom you have this relationship or indicate none (add rows as needed)                                                                                | Specifications/Comments (e.g., if payments were made to you or to your institution) |  |  |  |  |  |  |
|-----------|----------------------------------------------------------------------------------|-----------------------------------------------------------------------------------------------------------------------------------------------------------------------------|-------------------------------------------------------------------------------------|--|--|--|--|--|--|
| <b>11</b> | Stock or stock options                                                           | <input type="checkbox"/> <b>None</b><br><table border="1"> <tr> <td>Q'apel</td> <td></td> </tr> <tr> <td></td> <td></td> </tr> <tr> <td></td> <td></td> </tr> </table>      | Q'apel                                                                              |  |  |  |  |  |  |
| Q'apel    |                                                                                  |                                                                                                                                                                             |                                                                                     |  |  |  |  |  |  |
|           |                                                                                  |                                                                                                                                                                             |                                                                                     |  |  |  |  |  |  |
|           |                                                                                  |                                                                                                                                                                             |                                                                                     |  |  |  |  |  |  |
| <b>12</b> | Receipt of equipment, materials, drugs, medical writing, gifts or other services | <input checked="" type="checkbox"/> <b>None</b><br><table border="1"> <tr> <td></td> <td></td> </tr> <tr> <td></td> <td></td> </tr> <tr> <td></td> <td></td> </tr> </table> |                                                                                     |  |  |  |  |  |  |
|           |                                                                                  |                                                                                                                                                                             |                                                                                     |  |  |  |  |  |  |
|           |                                                                                  |                                                                                                                                                                             |                                                                                     |  |  |  |  |  |  |
|           |                                                                                  |                                                                                                                                                                             |                                                                                     |  |  |  |  |  |  |
| <b>13</b> | Other financial or non-financial interests                                       | <input checked="" type="checkbox"/> <b>None</b><br><table border="1"> <tr> <td></td> <td></td> </tr> <tr> <td></td> <td></td> </tr> <tr> <td></td> <td></td> </tr> </table> |                                                                                     |  |  |  |  |  |  |
|           |                                                                                  |                                                                                                                                                                             |                                                                                     |  |  |  |  |  |  |
|           |                                                                                  |                                                                                                                                                                             |                                                                                     |  |  |  |  |  |  |
|           |                                                                                  |                                                                                                                                                                             |                                                                                     |  |  |  |  |  |  |

**Please place an "X" next to the following statement to indicate your agreement:**

☒ I certify that I have answered every question and have not altered the wording of any of the questions on this form.

ICMJE DISCLOSURE FORM

Date:

1/13/2022

Your Name:

Peter Kim Nelson

Manuscript Title:

Prospective Study on Embolization of Intracranial Aneurysms with the Pipeline Device (PREMIER study): 3-year results with the application of a flow diverter-specific occlusion classification

Manuscript Number (if known):

neurintsurg-2021-018501

In the interest of transparency, we ask you to disclose all relationships/activities/interests listed below that are related to the content of your manuscript. “Related” means any relation with for-profit or not-for-profit third parties whose interests may be affected by the content of the manuscript. Disclosure represents a commitment to transparency and does not necessarily indicate a bias. If you are in doubt about whether to list a relationship/activity/interest, it is preferable that you do so.

The author’s relationships/activities/interests should be defined broadly. For example, if your manuscript pertains to the epidemiology of hypertension, you should declare all relationships with manufacturers of antihypertensive medication, even if that medication is not mentioned in the manuscript.

In item #1 below, report all support for the work reported in this manuscript without time limit. For all other items, the time frame for disclosure is the past 36 months.

|                                                    | Name all entities with whom you have this relationship or indicate none (add rows as needed)                                                                                                                                                                                                                                                                                      | Specifications/Comments (e.g., if payments were made to you or to your institution) |  |  |  |  |                                           |  |
|----------------------------------------------------|-----------------------------------------------------------------------------------------------------------------------------------------------------------------------------------------------------------------------------------------------------------------------------------------------------------------------------------------------------------------------------------|-------------------------------------------------------------------------------------|--|--|--|--|-------------------------------------------|--|
| Time frame: Since the initial planning of the work |                                                                                                                                                                                                                                                                                                                                                                                   |                                                                                     |  |  |  |  |                                           |  |
| 1                                                  | <div>All support for the present manuscript (e.g., funding, provision of study materials, medical writing, article processing charges, etc.)<br/>No time limit for this item.</div> <div><input checked="" type="checkbox"/> None</div> <table><tr><td></td><td></td></tr><tr><td></td><td></td></tr><tr><td></td><td>Click the tab key to add additional rows.</td></tr></table> |                                                                                     |  |  |  |  | Click the tab key to add additional rows. |  |
|                                                    |                                                                                                                                                                                                                                                                                                                                                                                   |                                                                                     |  |  |  |  |                                           |  |
|                                                    |                                                                                                                                                                                                                                                                                                                                                                                   |                                                                                     |  |  |  |  |                                           |  |
|                                                    | Click the tab key to add additional rows.                                                                                                                                                                                                                                                                                                                                         |                                                                                     |  |  |  |  |                                           |  |
| Time frame: past 36 months                         |                                                                                                                                                                                                                                                                                                                                                                                   |                                                                                     |  |  |  |  |                                           |  |
| 2                                                  | <div>Grants or contracts from any entity (if not indicated in item #1 above).</div> <div><input checked="" type="checkbox"/> None</div> <table><tr><td></td><td></td></tr><tr><td></td><td></td></tr><tr><td></td><td></td></tr></table>                                                                                                                                          |                                                                                     |  |  |  |  |                                           |  |
|                                                    |                                                                                                                                                                                                                                                                                                                                                                                   |                                                                                     |  |  |  |  |                                           |  |
|                                                    |                                                                                                                                                                                                                                                                                                                                                                                   |                                                                                     |  |  |  |  |                                           |  |
|                                                    |                                                                                                                                                                                                                                                                                                                                                                                   |                                                                                     |  |  |  |  |                                           |  |
| 3                                                  | <div>Royalties or licenses</div> <div><input checked="" type="checkbox"/> None</div> <table><tr><td></td><td></td></tr><tr><td></td><td></td></tr><tr><td></td><td></td></tr></table>                                                                                                                                                                                             |                                                                                     |  |  |  |  |                                           |  |
|                                                    |                                                                                                                                                                                                                                                                                                                                                                                   |                                                                                     |  |  |  |  |                                           |  |
|                                                    |                                                                                                                                                                                                                                                                                                                                                                                   |                                                                                     |  |  |  |  |                                           |  |
|                                                    |                                                                                                                                                                                                                                                                                                                                                                                   |                                                                                     |  |  |  |  |                                           |  |

|              |                                                                                                              | Name all entities with whom you have this relationship or indicate none (add rows as needed)                                                                                                                                                                                       | Specifications/Comments (e.g., if payments were made to you or to your institution) |                                              |              |                           |  |  |  |  |  |
|--------------|--------------------------------------------------------------------------------------------------------------|------------------------------------------------------------------------------------------------------------------------------------------------------------------------------------------------------------------------------------------------------------------------------------|-------------------------------------------------------------------------------------|----------------------------------------------|--------------|---------------------------|--|--|--|--|--|
| 4            | Consulting fees                                                                                              | <input type="checkbox"/> None<br><table border="1"> <tr> <td>Medtronic</td> <td>Consultant and Proctorship fees through 2018</td> </tr> <tr> <td>Phenox, GmbH</td> <td>Consultant fees 2016-2022</td> </tr> <tr> <td></td> <td></td> </tr> <tr> <td></td> <td></td> </tr> </table> | Medtronic                                                                           | Consultant and Proctorship fees through 2018 | Phenox, GmbH | Consultant fees 2016-2022 |  |  |  |  |  |
| Medtronic    | Consultant and Proctorship fees through 2018                                                                 |                                                                                                                                                                                                                                                                                    |                                                                                     |                                              |              |                           |  |  |  |  |  |
| Phenox, GmbH | Consultant fees 2016-2022                                                                                    |                                                                                                                                                                                                                                                                                    |                                                                                     |                                              |              |                           |  |  |  |  |  |
|              |                                                                                                              |                                                                                                                                                                                                                                                                                    |                                                                                     |                                              |              |                           |  |  |  |  |  |
|              |                                                                                                              |                                                                                                                                                                                                                                                                                    |                                                                                     |                                              |              |                           |  |  |  |  |  |
| 5            | Payment or honoraria for lectures, presentations, speakers bureaus, manuscript writing or educational events | <input checked="" type="checkbox"/> None<br><table border="1"> <tr> <td></td> <td></td> </tr> <tr> <td></td> <td></td> </tr> <tr> <td></td> <td></td> </tr> </table>                                                                                                               |                                                                                     |                                              |              |                           |  |  |  |  |  |
|              |                                                                                                              |                                                                                                                                                                                                                                                                                    |                                                                                     |                                              |              |                           |  |  |  |  |  |
|              |                                                                                                              |                                                                                                                                                                                                                                                                                    |                                                                                     |                                              |              |                           |  |  |  |  |  |
|              |                                                                                                              |                                                                                                                                                                                                                                                                                    |                                                                                     |                                              |              |                           |  |  |  |  |  |
| 6            | Payment for expert testimony                                                                                 | <input checked="" type="checkbox"/> None<br><table border="1"> <tr> <td></td> <td></td> </tr> <tr> <td></td> <td></td> </tr> <tr> <td></td> <td></td> </tr> </table>                                                                                                               |                                                                                     |                                              |              |                           |  |  |  |  |  |
|              |                                                                                                              |                                                                                                                                                                                                                                                                                    |                                                                                     |                                              |              |                           |  |  |  |  |  |
|              |                                                                                                              |                                                                                                                                                                                                                                                                                    |                                                                                     |                                              |              |                           |  |  |  |  |  |
|              |                                                                                                              |                                                                                                                                                                                                                                                                                    |                                                                                     |                                              |              |                           |  |  |  |  |  |
| 7            | Support for attending meetings and/or travel                                                                 | <input checked="" type="checkbox"/> None<br><table border="1"> <tr> <td></td> <td></td> </tr> <tr> <td></td> <td></td> </tr> <tr> <td></td> <td></td> </tr> </table>                                                                                                               |                                                                                     |                                              |              |                           |  |  |  |  |  |
|              |                                                                                                              |                                                                                                                                                                                                                                                                                    |                                                                                     |                                              |              |                           |  |  |  |  |  |
|              |                                                                                                              |                                                                                                                                                                                                                                                                                    |                                                                                     |                                              |              |                           |  |  |  |  |  |
|              |                                                                                                              |                                                                                                                                                                                                                                                                                    |                                                                                     |                                              |              |                           |  |  |  |  |  |
| 8            | Patents planned, issued or pending                                                                           | <input checked="" type="checkbox"/> None<br><table border="1"> <tr> <td></td> <td></td> </tr> <tr> <td></td> <td></td> </tr> <tr> <td></td> <td></td> </tr> </table>                                                                                                               |                                                                                     |                                              |              |                           |  |  |  |  |  |
|              |                                                                                                              |                                                                                                                                                                                                                                                                                    |                                                                                     |                                              |              |                           |  |  |  |  |  |
|              |                                                                                                              |                                                                                                                                                                                                                                                                                    |                                                                                     |                                              |              |                           |  |  |  |  |  |
|              |                                                                                                              |                                                                                                                                                                                                                                                                                    |                                                                                     |                                              |              |                           |  |  |  |  |  |
| 9            | Participation on a Data Safety Monitoring Board or Advisory Board                                            | <input checked="" type="checkbox"/> None<br><table border="1"> <tr> <td></td> <td></td> </tr> <tr> <td></td> <td></td> </tr> <tr> <td></td> <td></td> </tr> </table>                                                                                                               |                                                                                     |                                              |              |                           |  |  |  |  |  |
|              |                                                                                                              |                                                                                                                                                                                                                                                                                    |                                                                                     |                                              |              |                           |  |  |  |  |  |
|              |                                                                                                              |                                                                                                                                                                                                                                                                                    |                                                                                     |                                              |              |                           |  |  |  |  |  |
|              |                                                                                                              |                                                                                                                                                                                                                                                                                    |                                                                                     |                                              |              |                           |  |  |  |  |  |
| 10           | Leadership or fiduciary role in other board, society, committee or advocacy group, paid or unpaid            | <input checked="" type="checkbox"/> None<br><table border="1"> <tr> <td></td> <td></td> </tr> <tr> <td></td> <td></td> </tr> <tr> <td></td> <td></td> </tr> </table>                                                                                                               |                                                                                     |                                              |              |                           |  |  |  |  |  |
|              |                                                                                                              |                                                                                                                                                                                                                                                                                    |                                                                                     |                                              |              |                           |  |  |  |  |  |
|              |                                                                                                              |                                                                                                                                                                                                                                                                                    |                                                                                     |                                              |              |                           |  |  |  |  |  |
|              |                                                                                                              |                                                                                                                                                                                                                                                                                    |                                                                                     |                                              |              |                           |  |  |  |  |  |



|                                                                                                                                                                                                                                                               |                                                                                  | Name all entities with whom you have this relationship or indicate none (add rows as needed)                                                                                            | Specifications/Comments (e.g., if payments were made to you or to your institution) |  |  |  |  |  |  |
|---------------------------------------------------------------------------------------------------------------------------------------------------------------------------------------------------------------------------------------------------------------|----------------------------------------------------------------------------------|-----------------------------------------------------------------------------------------------------------------------------------------------------------------------------------------|-------------------------------------------------------------------------------------|--|--|--|--|--|--|
| <b>11</b>                                                                                                                                                                                                                                                     | Stock or stock options                                                           | <input checked="" type="checkbox"/> <b>None</b><br><table border="1" style="width: 100%;"> <tr><td></td><td></td></tr> <tr><td></td><td></td></tr> <tr><td></td><td></td></tr> </table> |                                                                                     |  |  |  |  |  |  |
|                                                                                                                                                                                                                                                               |                                                                                  |                                                                                                                                                                                         |                                                                                     |  |  |  |  |  |  |
|                                                                                                                                                                                                                                                               |                                                                                  |                                                                                                                                                                                         |                                                                                     |  |  |  |  |  |  |
|                                                                                                                                                                                                                                                               |                                                                                  |                                                                                                                                                                                         |                                                                                     |  |  |  |  |  |  |
| <b>12</b>                                                                                                                                                                                                                                                     | Receipt of equipment, materials, drugs, medical writing, gifts or other services | <input checked="" type="checkbox"/> <b>None</b><br><table border="1" style="width: 100%;"> <tr><td></td><td></td></tr> <tr><td></td><td></td></tr> <tr><td></td><td></td></tr> </table> |                                                                                     |  |  |  |  |  |  |
|                                                                                                                                                                                                                                                               |                                                                                  |                                                                                                                                                                                         |                                                                                     |  |  |  |  |  |  |
|                                                                                                                                                                                                                                                               |                                                                                  |                                                                                                                                                                                         |                                                                                     |  |  |  |  |  |  |
|                                                                                                                                                                                                                                                               |                                                                                  |                                                                                                                                                                                         |                                                                                     |  |  |  |  |  |  |
| <b>13</b>                                                                                                                                                                                                                                                     | Other financial or non-financial interests                                       | <input checked="" type="checkbox"/> <b>None</b><br><table border="1" style="width: 100%;"> <tr><td></td><td></td></tr> <tr><td></td><td></td></tr> <tr><td></td><td></td></tr> </table> |                                                                                     |  |  |  |  |  |  |
|                                                                                                                                                                                                                                                               |                                                                                  |                                                                                                                                                                                         |                                                                                     |  |  |  |  |  |  |
|                                                                                                                                                                                                                                                               |                                                                                  |                                                                                                                                                                                         |                                                                                     |  |  |  |  |  |  |
|                                                                                                                                                                                                                                                               |                                                                                  |                                                                                                                                                                                         |                                                                                     |  |  |  |  |  |  |
| <p><b>Please place an "X" next to the following statement to indicate your agreement:</b></p> <p><input checked="" type="checkbox"/> I certify that I have answered every question and have not altered the wording of any of the questions on this form.</p> |                                                                                  |                                                                                                                                                                                         |                                                                                     |  |  |  |  |  |  |

## ICMJE DISCLOSURE FORM

**Date:** 1/13/2022

**Your Name:** Peter Kan

**Manuscript Title:** Prospective Study on Embolization of Intracranial Aneurysms with the Pipeline Device (PREMIER study): 3-year results with the application of a flow diverter-specific occlusion classification

**Manuscript Number (if known):** neurintsurg-2021-018501

In the interest of transparency, we ask you to disclose all relationships/activities/interests listed below that are related to the content of your manuscript. "Related" means any relation with for-profit or not-for-profit third parties whose interests may be affected by the content of the manuscript. Disclosure represents a commitment to transparency and does not necessarily indicate a bias. If you are in doubt about whether to list a relationship/activity/interest, it is preferable that you do so.

The author's relationships/activities/interests should be defined broadly. For example, if your manuscript pertains to the epidemiology of hypertension, you should declare all relationships with manufacturers of antihypertensive medication, even if that medication is not mentioned in the manuscript.

In item #1 below, report all support for the work reported in this manuscript without time limit. For all other items, the time frame for disclosure is the past 36 months.

|                                                    |                                                                                                                                                                                | Name all entities with whom you have this relationship or indicate none (add rows as needed)                                                                                                                                                                                                                                                                                                                                                                              | Specifications/Comments (e.g., if payments were made to you or to your institution) |                 |                                          |                |                                     |          |                                           |
|----------------------------------------------------|--------------------------------------------------------------------------------------------------------------------------------------------------------------------------------|---------------------------------------------------------------------------------------------------------------------------------------------------------------------------------------------------------------------------------------------------------------------------------------------------------------------------------------------------------------------------------------------------------------------------------------------------------------------------|-------------------------------------------------------------------------------------|-----------------|------------------------------------------|----------------|-------------------------------------|----------|-------------------------------------------|
| Time frame: Since the initial planning of the work |                                                                                                                                                                                |                                                                                                                                                                                                                                                                                                                                                                                                                                                                           |                                                                                     |                 |                                          |                |                                     |          |                                           |
| 1                                                  | All support for the present manuscript (e.g., funding, provision of study materials, medical writing, article processing charges, etc.)<br><b>No time limit for this item.</b> | <input checked="" type="checkbox"/> <b>None</b><br><br><table border="1" style="width: 100%; border-collapse: collapse;"> <tr><td style="height: 20px;"></td><td style="height: 20px;"></td></tr> <tr><td style="height: 20px;"></td><td style="height: 20px;"></td></tr> <tr><td style="height: 20px;"></td><td style="height: 20px;"></td></tr> </table> <div style="text-align: right; font-size: small; color: #ccc;">Click the tab key to add additional rows.</div> |                                                                                     |                 |                                          |                |                                     |          |                                           |
|                                                    |                                                                                                                                                                                |                                                                                                                                                                                                                                                                                                                                                                                                                                                                           |                                                                                     |                 |                                          |                |                                     |          |                                           |
|                                                    |                                                                                                                                                                                |                                                                                                                                                                                                                                                                                                                                                                                                                                                                           |                                                                                     |                 |                                          |                |                                     |          |                                           |
|                                                    |                                                                                                                                                                                |                                                                                                                                                                                                                                                                                                                                                                                                                                                                           |                                                                                     |                 |                                          |                |                                     |          |                                           |
| Time frame: past 36 months                         |                                                                                                                                                                                |                                                                                                                                                                                                                                                                                                                                                                                                                                                                           |                                                                                     |                 |                                          |                |                                     |          |                                           |
| 2                                                  | Grants or contracts from any entity (if not indicated in item #1 above).                                                                                                       | <input type="checkbox"/> <b>None</b><br><br><table border="1" style="width: 100%; border-collapse: collapse;"> <tr> <td style="width: 50%;">1U18EB029353-01</td> <td style="width: 50%;">NIH grant through NINDS, 9/30/19-6/30/22</td> </tr> <tr> <td>ERP-2019-12070</td> <td>Medtronic research grant, unrelated</td> </tr> <tr> <td>18RDM007</td> <td>Roderick D. MacDonald Research Foundation</td> </tr> </table>                                                     |                                                                                     | 1U18EB029353-01 | NIH grant through NINDS, 9/30/19-6/30/22 | ERP-2019-12070 | Medtronic research grant, unrelated | 18RDM007 | Roderick D. MacDonald Research Foundation |
| 1U18EB029353-01                                    | NIH grant through NINDS, 9/30/19-6/30/22                                                                                                                                       |                                                                                                                                                                                                                                                                                                                                                                                                                                                                           |                                                                                     |                 |                                          |                |                                     |          |                                           |
| ERP-2019-12070                                     | Medtronic research grant, unrelated                                                                                                                                            |                                                                                                                                                                                                                                                                                                                                                                                                                                                                           |                                                                                     |                 |                                          |                |                                     |          |                                           |
| 18RDM007                                           | Roderick D. MacDonald Research Foundation                                                                                                                                      |                                                                                                                                                                                                                                                                                                                                                                                                                                                                           |                                                                                     |                 |                                          |                |                                     |          |                                           |
| 3                                                  | Royalties or licenses                                                                                                                                                          | <input checked="" type="checkbox"/> <b>None</b><br><br><table border="1" style="width: 100%; border-collapse: collapse;"> <tr><td style="height: 20px;"></td><td style="height: 20px;"></td></tr> <tr><td style="height: 20px;"></td><td style="height: 20px;"></td></tr> <tr><td style="height: 20px;"></td><td style="height: 20px;"></td></tr> </table>                                                                                                                |                                                                                     |                 |                                          |                |                                     |          |                                           |
|                                                    |                                                                                                                                                                                |                                                                                                                                                                                                                                                                                                                                                                                                                                                                           |                                                                                     |                 |                                          |                |                                     |          |                                           |
|                                                    |                                                                                                                                                                                |                                                                                                                                                                                                                                                                                                                                                                                                                                                                           |                                                                                     |                 |                                          |                |                                     |          |                                           |
|                                                    |                                                                                                                                                                                |                                                                                                                                                                                                                                                                                                                                                                                                                                                                           |                                                                                     |                 |                                          |                |                                     |          |                                           |

|                                               |                                                                                                              | Name all entities with whom you have this relationship or indicate none (add rows as needed)                                                                                                                                                          | Specifications/Comments (e.g., if payments were made to you or to your institution) |                                               |                 |                 |           |  |  |  |  |
|-----------------------------------------------|--------------------------------------------------------------------------------------------------------------|-------------------------------------------------------------------------------------------------------------------------------------------------------------------------------------------------------------------------------------------------------|-------------------------------------------------------------------------------------|-----------------------------------------------|-----------------|-----------------|-----------|--|--|--|--|
| 4                                             | Consulting fees                                                                                              | <input type="checkbox"/> <b>None</b><br><table border="1"> <tr> <td>Stryker Neurovascular</td> <td>Unrelated</td> </tr> <tr> <td>Imperative Care</td> <td>Unrelated</td> </tr> <tr> <td></td> <td></td> </tr> <tr> <td></td> <td></td> </tr> </table> |                                                                                     | Stryker Neurovascular                         | Unrelated       | Imperative Care | Unrelated |  |  |  |  |
| Stryker Neurovascular                         | Unrelated                                                                                                    |                                                                                                                                                                                                                                                       |                                                                                     |                                               |                 |                 |           |  |  |  |  |
| Imperative Care                               | Unrelated                                                                                                    |                                                                                                                                                                                                                                                       |                                                                                     |                                               |                 |                 |           |  |  |  |  |
|                                               |                                                                                                              |                                                                                                                                                                                                                                                       |                                                                                     |                                               |                 |                 |           |  |  |  |  |
|                                               |                                                                                                              |                                                                                                                                                                                                                                                       |                                                                                     |                                               |                 |                 |           |  |  |  |  |
| 5                                             | Payment or honoraria for lectures, presentations, speakers bureaus, manuscript writing or educational events | <input checked="" type="checkbox"/> <b>None</b><br><table border="1"> <tr> <td></td> <td></td> </tr> <tr> <td></td> <td></td> </tr> <tr> <td></td> <td></td> </tr> </table>                                                                           |                                                                                     |                                               |                 |                 |           |  |  |  |  |
|                                               |                                                                                                              |                                                                                                                                                                                                                                                       |                                                                                     |                                               |                 |                 |           |  |  |  |  |
|                                               |                                                                                                              |                                                                                                                                                                                                                                                       |                                                                                     |                                               |                 |                 |           |  |  |  |  |
|                                               |                                                                                                              |                                                                                                                                                                                                                                                       |                                                                                     |                                               |                 |                 |           |  |  |  |  |
| 6                                             | Payment for expert testimony                                                                                 | <input checked="" type="checkbox"/> <b>None</b><br><table border="1"> <tr> <td></td> <td></td> </tr> <tr> <td></td> <td></td> </tr> <tr> <td></td> <td></td> </tr> </table>                                                                           |                                                                                     |                                               |                 |                 |           |  |  |  |  |
|                                               |                                                                                                              |                                                                                                                                                                                                                                                       |                                                                                     |                                               |                 |                 |           |  |  |  |  |
|                                               |                                                                                                              |                                                                                                                                                                                                                                                       |                                                                                     |                                               |                 |                 |           |  |  |  |  |
|                                               |                                                                                                              |                                                                                                                                                                                                                                                       |                                                                                     |                                               |                 |                 |           |  |  |  |  |
| 7                                             | Support for attending meetings and/or travel                                                                 | <input checked="" type="checkbox"/> <b>None</b><br><table border="1"> <tr> <td></td> <td></td> </tr> <tr> <td></td> <td></td> </tr> <tr> <td></td> <td></td> </tr> </table>                                                                           |                                                                                     |                                               |                 |                 |           |  |  |  |  |
|                                               |                                                                                                              |                                                                                                                                                                                                                                                       |                                                                                     |                                               |                 |                 |           |  |  |  |  |
|                                               |                                                                                                              |                                                                                                                                                                                                                                                       |                                                                                     |                                               |                 |                 |           |  |  |  |  |
|                                               |                                                                                                              |                                                                                                                                                                                                                                                       |                                                                                     |                                               |                 |                 |           |  |  |  |  |
| 8                                             | Patents planned, issued or pending                                                                           | <input checked="" type="checkbox"/> <b>None</b><br><table border="1"> <tr> <td></td> <td></td> </tr> <tr> <td></td> <td></td> </tr> <tr> <td></td> <td></td> </tr> </table>                                                                           |                                                                                     |                                               |                 |                 |           |  |  |  |  |
|                                               |                                                                                                              |                                                                                                                                                                                                                                                       |                                                                                     |                                               |                 |                 |           |  |  |  |  |
|                                               |                                                                                                              |                                                                                                                                                                                                                                                       |                                                                                     |                                               |                 |                 |           |  |  |  |  |
|                                               |                                                                                                              |                                                                                                                                                                                                                                                       |                                                                                     |                                               |                 |                 |           |  |  |  |  |
| 9                                             | Participation on a Data Safety Monitoring Board or Advisory Board                                            | <input checked="" type="checkbox"/> <b>None</b><br><table border="1"> <tr> <td></td> <td></td> </tr> <tr> <td></td> <td></td> </tr> <tr> <td></td> <td></td> </tr> </table>                                                                           |                                                                                     |                                               |                 |                 |           |  |  |  |  |
|                                               |                                                                                                              |                                                                                                                                                                                                                                                       |                                                                                     |                                               |                 |                 |           |  |  |  |  |
|                                               |                                                                                                              |                                                                                                                                                                                                                                                       |                                                                                     |                                               |                 |                 |           |  |  |  |  |
|                                               |                                                                                                              |                                                                                                                                                                                                                                                       |                                                                                     |                                               |                 |                 |           |  |  |  |  |
| 10                                            | Leadership or fiduciary role in other board, society, committee or advocacy group, paid or unpaid            | <input type="checkbox"/> <b>None</b><br><table border="1"> <tr> <td>Journal of Neurointerventional Surgery (JNIS)</td> <td>Editorial Board</td> </tr> <tr> <td></td> <td></td> </tr> <tr> <td></td> <td></td> </tr> </table>                          |                                                                                     | Journal of Neurointerventional Surgery (JNIS) | Editorial Board |                 |           |  |  |  |  |
| Journal of Neurointerventional Surgery (JNIS) | Editorial Board                                                                                              |                                                                                                                                                                                                                                                       |                                                                                     |                                               |                 |                 |           |  |  |  |  |
|                                               |                                                                                                              |                                                                                                                                                                                                                                                       |                                                                                     |                                               |                 |                 |           |  |  |  |  |
|                                               |                                                                                                              |                                                                                                                                                                                                                                                       |                                                                                     |                                               |                 |                 |           |  |  |  |  |

|           |                                                                                  | Name all entities with whom you have this relationship or indicate none (add rows as needed)                                                                       | Specifications/Comments (e.g., if payments were made to you or to your institution) |  |  |  |  |  |  |
|-----------|----------------------------------------------------------------------------------|--------------------------------------------------------------------------------------------------------------------------------------------------------------------|-------------------------------------------------------------------------------------|--|--|--|--|--|--|
| <b>11</b> | Stock or stock options                                                           | <input checked="" type="checkbox"/> <b>None</b><br><table border="1"> <tr><td></td><td></td></tr> <tr><td></td><td></td></tr> <tr><td></td><td></td></tr> </table> |                                                                                     |  |  |  |  |  |  |
|           |                                                                                  |                                                                                                                                                                    |                                                                                     |  |  |  |  |  |  |
|           |                                                                                  |                                                                                                                                                                    |                                                                                     |  |  |  |  |  |  |
|           |                                                                                  |                                                                                                                                                                    |                                                                                     |  |  |  |  |  |  |
| <b>12</b> | Receipt of equipment, materials, drugs, medical writing, gifts or other services | <input checked="" type="checkbox"/> <b>None</b><br><table border="1"> <tr><td></td><td></td></tr> <tr><td></td><td></td></tr> <tr><td></td><td></td></tr> </table> |                                                                                     |  |  |  |  |  |  |
|           |                                                                                  |                                                                                                                                                                    |                                                                                     |  |  |  |  |  |  |
|           |                                                                                  |                                                                                                                                                                    |                                                                                     |  |  |  |  |  |  |
|           |                                                                                  |                                                                                                                                                                    |                                                                                     |  |  |  |  |  |  |
| <b>13</b> | Other financial or non-financial interests                                       | <input checked="" type="checkbox"/> <b>None</b><br><table border="1"> <tr><td></td><td></td></tr> <tr><td></td><td></td></tr> <tr><td></td><td></td></tr> </table> |                                                                                     |  |  |  |  |  |  |
|           |                                                                                  |                                                                                                                                                                    |                                                                                     |  |  |  |  |  |  |
|           |                                                                                  |                                                                                                                                                                    |                                                                                     |  |  |  |  |  |  |
|           |                                                                                  |                                                                                                                                                                    |                                                                                     |  |  |  |  |  |  |

**Please place an "X" next to the following statement to indicate your agreement:**

☒ I certify that I have answered every question and have not altered the wording of any of the questions on this form.

## ICMJE DISCLOSURE FORM

**Date:** 1/13/2022

**Your Name:** Philipp Taussky

**Manuscript Title:** Prospective Study on Embolization of Intracranial Aneurysms with the Pipeline Device (PREMIER study): 3-year results with the application of a flow diverter-specific occlusion classification

**Manuscript Number (if known):** neurintsurg-2021-018501

In the interest of transparency, we ask you to disclose all relationships/activities/interests listed below that are related to the content of your manuscript. "Related" means any relation with for-profit or not-for-profit third parties whose interests may be affected by the content of the manuscript. Disclosure represents a commitment to transparency and does not necessarily indicate a bias. If you are in doubt about whether to list a relationship/activity/interest, it is preferable that you do so.

The author's relationships/activities/interests should be defined broadly. For example, if your manuscript pertains to the epidemiology of hypertension, you should declare all relationships with manufacturers of antihypertensive medication, even if that medication is not mentioned in the manuscript.

In item #1 below, report all support for the work reported in this manuscript without time limit. For all other items, the time frame for disclosure is the past 36 months.

|                                                           | Name all entities with whom you have this relationship or indicate none (add rows as needed)                                                                                   | Specifications/Comments (e.g., if payments were made to you or to your institution)                                                                                                                          |  |  |  |  |  |  |
|-----------------------------------------------------------|--------------------------------------------------------------------------------------------------------------------------------------------------------------------------------|--------------------------------------------------------------------------------------------------------------------------------------------------------------------------------------------------------------|--|--|--|--|--|--|
| <b>Time frame: Since the initial planning of the work</b> |                                                                                                                                                                                |                                                                                                                                                                                                              |  |  |  |  |  |  |
| <b>1</b>                                                  | All support for the present manuscript (e.g., funding, provision of study materials, medical writing, article processing charges, etc.)<br><b>No time limit for this item.</b> | <input checked="" type="checkbox"/> <b>None</b><br><table border="1"> <tr><td></td><td></td></tr> <tr><td></td><td></td></tr> <tr><td></td><td></td></tr> </table> Click the tab key to add additional rows. |  |  |  |  |  |  |
|                                                           |                                                                                                                                                                                |                                                                                                                                                                                                              |  |  |  |  |  |  |
|                                                           |                                                                                                                                                                                |                                                                                                                                                                                                              |  |  |  |  |  |  |
|                                                           |                                                                                                                                                                                |                                                                                                                                                                                                              |  |  |  |  |  |  |
| <b>Time frame: past 36 months</b>                         |                                                                                                                                                                                |                                                                                                                                                                                                              |  |  |  |  |  |  |
| <b>2</b>                                                  | Grants or contracts from any entity (if not indicated in item #1 above).                                                                                                       | <input checked="" type="checkbox"/> <b>None</b><br><table border="1"> <tr><td></td><td></td></tr> <tr><td></td><td></td></tr> <tr><td></td><td></td></tr> </table>                                           |  |  |  |  |  |  |
|                                                           |                                                                                                                                                                                |                                                                                                                                                                                                              |  |  |  |  |  |  |
|                                                           |                                                                                                                                                                                |                                                                                                                                                                                                              |  |  |  |  |  |  |
|                                                           |                                                                                                                                                                                |                                                                                                                                                                                                              |  |  |  |  |  |  |
| <b>3</b>                                                  | Royalties or licenses                                                                                                                                                          | <input checked="" type="checkbox"/> <b>None</b><br><table border="1"> <tr><td></td><td></td></tr> <tr><td></td><td></td></tr> <tr><td></td><td></td></tr> </table>                                           |  |  |  |  |  |  |
|                                                           |                                                                                                                                                                                |                                                                                                                                                                                                              |  |  |  |  |  |  |
|                                                           |                                                                                                                                                                                |                                                                                                                                                                                                              |  |  |  |  |  |  |
|                                                           |                                                                                                                                                                                |                                                                                                                                                                                                              |  |  |  |  |  |  |

|                       |                                                                                                              | Name all entities with whom you have this relationship or indicate none (add rows as needed)                                                                                                                                                                  | Specifications/Comments (e.g., if payments were made to you or to your institution) |            |           |            |           |            |  |  |  |
|-----------------------|--------------------------------------------------------------------------------------------------------------|---------------------------------------------------------------------------------------------------------------------------------------------------------------------------------------------------------------------------------------------------------------|-------------------------------------------------------------------------------------|------------|-----------|------------|-----------|------------|--|--|--|
| 4                     | Consulting fees                                                                                              | <input type="checkbox"/> None<br><table border="1"> <tr> <td>Stryker Neurovascular</td> <td>Consultant</td> </tr> <tr> <td>Cerenovus</td> <td>Consultant</td> </tr> <tr> <td>Medtronic</td> <td>Consultant</td> </tr> <tr> <td></td> <td></td> </tr> </table> | Stryker Neurovascular                                                               | Consultant | Cerenovus | Consultant | Medtronic | Consultant |  |  |  |
| Stryker Neurovascular | Consultant                                                                                                   |                                                                                                                                                                                                                                                               |                                                                                     |            |           |            |           |            |  |  |  |
| Cerenovus             | Consultant                                                                                                   |                                                                                                                                                                                                                                                               |                                                                                     |            |           |            |           |            |  |  |  |
| Medtronic             | Consultant                                                                                                   |                                                                                                                                                                                                                                                               |                                                                                     |            |           |            |           |            |  |  |  |
|                       |                                                                                                              |                                                                                                                                                                                                                                                               |                                                                                     |            |           |            |           |            |  |  |  |
| 5                     | Payment or honoraria for lectures, presentations, speakers bureaus, manuscript writing or educational events | <input checked="" type="checkbox"/> None<br><table border="1"> <tr> <td></td> <td></td> </tr> <tr> <td></td> <td></td> </tr> <tr> <td></td> <td></td> </tr> </table>                                                                                          |                                                                                     |            |           |            |           |            |  |  |  |
|                       |                                                                                                              |                                                                                                                                                                                                                                                               |                                                                                     |            |           |            |           |            |  |  |  |
|                       |                                                                                                              |                                                                                                                                                                                                                                                               |                                                                                     |            |           |            |           |            |  |  |  |
|                       |                                                                                                              |                                                                                                                                                                                                                                                               |                                                                                     |            |           |            |           |            |  |  |  |
| 6                     | Payment for expert testimony                                                                                 | <input checked="" type="checkbox"/> None<br><table border="1"> <tr> <td></td> <td></td> </tr> <tr> <td></td> <td></td> </tr> <tr> <td></td> <td></td> </tr> </table>                                                                                          |                                                                                     |            |           |            |           |            |  |  |  |
|                       |                                                                                                              |                                                                                                                                                                                                                                                               |                                                                                     |            |           |            |           |            |  |  |  |
|                       |                                                                                                              |                                                                                                                                                                                                                                                               |                                                                                     |            |           |            |           |            |  |  |  |
|                       |                                                                                                              |                                                                                                                                                                                                                                                               |                                                                                     |            |           |            |           |            |  |  |  |
| 7                     | Support for attending meetings and/or travel                                                                 | <input checked="" type="checkbox"/> None<br><table border="1"> <tr> <td></td> <td></td> </tr> <tr> <td></td> <td></td> </tr> <tr> <td></td> <td></td> </tr> </table>                                                                                          |                                                                                     |            |           |            |           |            |  |  |  |
|                       |                                                                                                              |                                                                                                                                                                                                                                                               |                                                                                     |            |           |            |           |            |  |  |  |
|                       |                                                                                                              |                                                                                                                                                                                                                                                               |                                                                                     |            |           |            |           |            |  |  |  |
|                       |                                                                                                              |                                                                                                                                                                                                                                                               |                                                                                     |            |           |            |           |            |  |  |  |
| 8                     | Patents planned, issued or pending                                                                           | <input checked="" type="checkbox"/> None<br><table border="1"> <tr> <td></td> <td></td> </tr> <tr> <td></td> <td></td> </tr> <tr> <td></td> <td></td> </tr> </table>                                                                                          |                                                                                     |            |           |            |           |            |  |  |  |
|                       |                                                                                                              |                                                                                                                                                                                                                                                               |                                                                                     |            |           |            |           |            |  |  |  |
|                       |                                                                                                              |                                                                                                                                                                                                                                                               |                                                                                     |            |           |            |           |            |  |  |  |
|                       |                                                                                                              |                                                                                                                                                                                                                                                               |                                                                                     |            |           |            |           |            |  |  |  |
| 9                     | Participation on a Data Safety Monitoring Board or Advisory Board                                            | <input checked="" type="checkbox"/> None<br><table border="1"> <tr> <td></td> <td></td> </tr> <tr> <td></td> <td></td> </tr> <tr> <td></td> <td></td> </tr> </table>                                                                                          |                                                                                     |            |           |            |           |            |  |  |  |
|                       |                                                                                                              |                                                                                                                                                                                                                                                               |                                                                                     |            |           |            |           |            |  |  |  |
|                       |                                                                                                              |                                                                                                                                                                                                                                                               |                                                                                     |            |           |            |           |            |  |  |  |
|                       |                                                                                                              |                                                                                                                                                                                                                                                               |                                                                                     |            |           |            |           |            |  |  |  |
| 10                    | Leadership or fiduciary role in other board, society, committee or advocacy group, paid or unpaid            | <input checked="" type="checkbox"/> None<br><table border="1"> <tr> <td></td> <td></td> </tr> <tr> <td></td> <td></td> </tr> <tr> <td></td> <td></td> </tr> </table>                                                                                          |                                                                                     |            |           |            |           |            |  |  |  |
|                       |                                                                                                              |                                                                                                                                                                                                                                                               |                                                                                     |            |           |            |           |            |  |  |  |
|                       |                                                                                                              |                                                                                                                                                                                                                                                               |                                                                                     |            |           |            |           |            |  |  |  |
|                       |                                                                                                              |                                                                                                                                                                                                                                                               |                                                                                     |            |           |            |           |            |  |  |  |

|                                                                                                                                                                                                                                                               |                                                                                  | Name all entities with whom you have this relationship or indicate none (add rows as needed)                                                                                                    | Specifications/Comments (e.g., if payments were made to you or to your institution) |  |  |  |  |  |  |
|---------------------------------------------------------------------------------------------------------------------------------------------------------------------------------------------------------------------------------------------------------------|----------------------------------------------------------------------------------|-------------------------------------------------------------------------------------------------------------------------------------------------------------------------------------------------|-------------------------------------------------------------------------------------|--|--|--|--|--|--|
| <b>11</b>                                                                                                                                                                                                                                                     | Stock or stock options                                                           | <input checked="" type="checkbox"/> <b>None</b><br><table border="1" data-bbox="415 342 1437 434"> <tr><td></td><td></td></tr> <tr><td></td><td></td></tr> <tr><td></td><td></td></tr> </table> |                                                                                     |  |  |  |  |  |  |
|                                                                                                                                                                                                                                                               |                                                                                  |                                                                                                                                                                                                 |                                                                                     |  |  |  |  |  |  |
|                                                                                                                                                                                                                                                               |                                                                                  |                                                                                                                                                                                                 |                                                                                     |  |  |  |  |  |  |
|                                                                                                                                                                                                                                                               |                                                                                  |                                                                                                                                                                                                 |                                                                                     |  |  |  |  |  |  |
| <b>12</b>                                                                                                                                                                                                                                                     | Receipt of equipment, materials, drugs, medical writing, gifts or other services | <input checked="" type="checkbox"/> <b>None</b><br><table border="1" data-bbox="415 537 1437 630"> <tr><td></td><td></td></tr> <tr><td></td><td></td></tr> <tr><td></td><td></td></tr> </table> |                                                                                     |  |  |  |  |  |  |
|                                                                                                                                                                                                                                                               |                                                                                  |                                                                                                                                                                                                 |                                                                                     |  |  |  |  |  |  |
|                                                                                                                                                                                                                                                               |                                                                                  |                                                                                                                                                                                                 |                                                                                     |  |  |  |  |  |  |
|                                                                                                                                                                                                                                                               |                                                                                  |                                                                                                                                                                                                 |                                                                                     |  |  |  |  |  |  |
| <b>13</b>                                                                                                                                                                                                                                                     | Other financial or non-financial interests                                       | <input checked="" type="checkbox"/> <b>None</b><br><table border="1" data-bbox="415 730 1437 823"> <tr><td></td><td></td></tr> <tr><td></td><td></td></tr> <tr><td></td><td></td></tr> </table> |                                                                                     |  |  |  |  |  |  |
|                                                                                                                                                                                                                                                               |                                                                                  |                                                                                                                                                                                                 |                                                                                     |  |  |  |  |  |  |
|                                                                                                                                                                                                                                                               |                                                                                  |                                                                                                                                                                                                 |                                                                                     |  |  |  |  |  |  |
|                                                                                                                                                                                                                                                               |                                                                                  |                                                                                                                                                                                                 |                                                                                     |  |  |  |  |  |  |
| <p><b>Please place an "X" next to the following statement to indicate your agreement:</b></p> <p><input checked="" type="checkbox"/> I certify that I have answered every question and have not altered the wording of any of the questions on this form.</p> |                                                                                  |                                                                                                                                                                                                 |                                                                                     |  |  |  |  |  |  |

## ICMJE DISCLOSURE FORM

**Date:** 1/11/2021

**Your Name:** Ricardo A. Hanel, MD, PhD

**Manuscript Title:** Prospective Study on Embolization of Intracranial Aneurysms with the Pipeline Device (PREMIER study): 3-year results with the application of a flow diverter-specific occlusion classification

**Manuscript Number (if known):** neurintsurg-2021-018501

In the interest of transparency, we ask you to disclose all relationships/activities/interests listed below that are related to the content of your manuscript. "Related" means any relation with for-profit or not-for-profit third parties whose interests may be affected by the content of the manuscript. Disclosure represents a commitment to transparency and does not necessarily indicate a bias. If you are in doubt about whether to list a relationship/activity/interest, it is preferable that you do so.

The author's relationships/activities/interests should be defined broadly. For example, if your manuscript pertains to the epidemiology of hypertension, you should declare all relationships with manufacturers of antihypertensive medication, even if that medication is not mentioned in the manuscript.

In item #1 below, report all support for the work reported in this manuscript without time limit. For all other items, the time frame for disclosure is the past 36 months.

|                                                           | Name all entities with whom you have this relationship or indicate none (add rows as needed)                                                                                   | Specifications/Comments (e.g., if payments were made to you or to your institution)                                                                                                                                                                         |     |  |                     |  |              |  |         |  |     |  |
|-----------------------------------------------------------|--------------------------------------------------------------------------------------------------------------------------------------------------------------------------------|-------------------------------------------------------------------------------------------------------------------------------------------------------------------------------------------------------------------------------------------------------------|-----|--|---------------------|--|--------------|--|---------|--|-----|--|
| <b>Time frame: Since the initial planning of the work</b> |                                                                                                                                                                                |                                                                                                                                                                                                                                                             |     |  |                     |  |              |  |         |  |     |  |
| <b>1</b>                                                  | All support for the present manuscript (e.g., funding, provision of study materials, medical writing, article processing charges, etc.)<br><b>No time limit for this item.</b> | <input checked="" type="checkbox"/> <b>None</b><br><table border="1"> <tr><td></td><td></td></tr> <tr><td></td><td></td></tr> <tr><td></td><td></td></tr> </table> Click the tab key to add additional rows.                                                |     |  |                     |  |              |  |         |  |     |  |
|                                                           |                                                                                                                                                                                |                                                                                                                                                                                                                                                             |     |  |                     |  |              |  |         |  |     |  |
|                                                           |                                                                                                                                                                                |                                                                                                                                                                                                                                                             |     |  |                     |  |              |  |         |  |     |  |
|                                                           |                                                                                                                                                                                |                                                                                                                                                                                                                                                             |     |  |                     |  |              |  |         |  |     |  |
| <b>Time frame: past 36 months</b>                         |                                                                                                                                                                                |                                                                                                                                                                                                                                                             |     |  |                     |  |              |  |         |  |     |  |
| <b>2</b>                                                  | Grants or contracts from any entity (if not indicated in item #1 above).                                                                                                       | <input type="checkbox"/> <b>None</b><br><table border="1"> <tr><td>NIH</td><td></td></tr> <tr><td>Interline Endowment</td><td></td></tr> <tr><td>Microvention</td><td></td></tr> <tr><td>Stryker</td><td></td></tr> <tr><td>CNX</td><td></td></tr> </table> | NIH |  | Interline Endowment |  | Microvention |  | Stryker |  | CNX |  |
| NIH                                                       |                                                                                                                                                                                |                                                                                                                                                                                                                                                             |     |  |                     |  |              |  |         |  |     |  |
| Interline Endowment                                       |                                                                                                                                                                                |                                                                                                                                                                                                                                                             |     |  |                     |  |              |  |         |  |     |  |
| Microvention                                              |                                                                                                                                                                                |                                                                                                                                                                                                                                                             |     |  |                     |  |              |  |         |  |     |  |
| Stryker                                                   |                                                                                                                                                                                |                                                                                                                                                                                                                                                             |     |  |                     |  |              |  |         |  |     |  |
| CNX                                                       |                                                                                                                                                                                |                                                                                                                                                                                                                                                             |     |  |                     |  |              |  |         |  |     |  |
| <b>3</b>                                                  | Royalties or licenses                                                                                                                                                          | <input checked="" type="checkbox"/> <b>None</b><br><table border="1"> <tr><td></td><td></td></tr> <tr><td></td><td></td></tr> <tr><td></td><td></td></tr> </table>                                                                                          |     |  |                     |  |              |  |         |  |     |  |
|                                                           |                                                                                                                                                                                |                                                                                                                                                                                                                                                             |     |  |                     |  |              |  |         |  |     |  |
|                                                           |                                                                                                                                                                                |                                                                                                                                                                                                                                                             |     |  |                     |  |              |  |         |  |     |  |
|                                                           |                                                                                                                                                                                |                                                                                                                                                                                                                                                             |     |  |                     |  |              |  |         |  |     |  |



|                      |                                                                                                              | Name all entities with whom you have this relationship or indicate none (add rows as needed)                                                                                                                                                                                                                                                                                                                                                                                                                                                                                                                          | Specifications/Comments (e.g., if payments were made to you or to your institution) |                        |      |            |              |                        |                     |            |                    |            |           |            |              |            |                      |            |             |            |               |            |  |
|----------------------|--------------------------------------------------------------------------------------------------------------|-----------------------------------------------------------------------------------------------------------------------------------------------------------------------------------------------------------------------------------------------------------------------------------------------------------------------------------------------------------------------------------------------------------------------------------------------------------------------------------------------------------------------------------------------------------------------------------------------------------------------|-------------------------------------------------------------------------------------|------------------------|------|------------|--------------|------------------------|---------------------|------------|--------------------|------------|-----------|------------|--------------|------------|----------------------|------------|-------------|------------|---------------|------------|--|
| 4                    | Consulting fees                                                                                              | <input type="checkbox"/> <b>None</b><br><table border="1"> <tr><td>Medtronic</td><td>Consultant and proctor</td></tr> <tr><td>Balt</td><td>Consultant</td></tr> <tr><td>Stryker</td><td>Consultant and proctor</td></tr> <tr><td>Q'Apel Medical, Inc</td><td>Consultant</td></tr> <tr><td>Codman Neuro (J&amp;J)</td><td>Consultant</td></tr> <tr><td>Cerenovus</td><td>Consultant</td></tr> <tr><td>Microvention</td><td>Consultant</td></tr> <tr><td>Imperative Care, Inc</td><td>Consultant</td></tr> <tr><td>Phenox, Inc</td><td>Consultant</td></tr> <tr><td>Rapid Medical</td><td>Consultant</td></tr> </table> | Medtronic                                                                           | Consultant and proctor | Balt | Consultant | Stryker      | Consultant and proctor | Q'Apel Medical, Inc | Consultant | Codman Neuro (J&J) | Consultant | Cerenovus | Consultant | Microvention | Consultant | Imperative Care, Inc | Consultant | Phenox, Inc | Consultant | Rapid Medical | Consultant |  |
| Medtronic            | Consultant and proctor                                                                                       |                                                                                                                                                                                                                                                                                                                                                                                                                                                                                                                                                                                                                       |                                                                                     |                        |      |            |              |                        |                     |            |                    |            |           |            |              |            |                      |            |             |            |               |            |  |
| Balt                 | Consultant                                                                                                   |                                                                                                                                                                                                                                                                                                                                                                                                                                                                                                                                                                                                                       |                                                                                     |                        |      |            |              |                        |                     |            |                    |            |           |            |              |            |                      |            |             |            |               |            |  |
| Stryker              | Consultant and proctor                                                                                       |                                                                                                                                                                                                                                                                                                                                                                                                                                                                                                                                                                                                                       |                                                                                     |                        |      |            |              |                        |                     |            |                    |            |           |            |              |            |                      |            |             |            |               |            |  |
| Q'Apel Medical, Inc  | Consultant                                                                                                   |                                                                                                                                                                                                                                                                                                                                                                                                                                                                                                                                                                                                                       |                                                                                     |                        |      |            |              |                        |                     |            |                    |            |           |            |              |            |                      |            |             |            |               |            |  |
| Codman Neuro (J&J)   | Consultant                                                                                                   |                                                                                                                                                                                                                                                                                                                                                                                                                                                                                                                                                                                                                       |                                                                                     |                        |      |            |              |                        |                     |            |                    |            |           |            |              |            |                      |            |             |            |               |            |  |
| Cerenovus            | Consultant                                                                                                   |                                                                                                                                                                                                                                                                                                                                                                                                                                                                                                                                                                                                                       |                                                                                     |                        |      |            |              |                        |                     |            |                    |            |           |            |              |            |                      |            |             |            |               |            |  |
| Microvention         | Consultant                                                                                                   |                                                                                                                                                                                                                                                                                                                                                                                                                                                                                                                                                                                                                       |                                                                                     |                        |      |            |              |                        |                     |            |                    |            |           |            |              |            |                      |            |             |            |               |            |  |
| Imperative Care, Inc | Consultant                                                                                                   |                                                                                                                                                                                                                                                                                                                                                                                                                                                                                                                                                                                                                       |                                                                                     |                        |      |            |              |                        |                     |            |                    |            |           |            |              |            |                      |            |             |            |               |            |  |
| Phenox, Inc          | Consultant                                                                                                   |                                                                                                                                                                                                                                                                                                                                                                                                                                                                                                                                                                                                                       |                                                                                     |                        |      |            |              |                        |                     |            |                    |            |           |            |              |            |                      |            |             |            |               |            |  |
| Rapid Medical        | Consultant                                                                                                   |                                                                                                                                                                                                                                                                                                                                                                                                                                                                                                                                                                                                                       |                                                                                     |                        |      |            |              |                        |                     |            |                    |            |           |            |              |            |                      |            |             |            |               |            |  |
| 5                    | Payment or honoraria for lectures, presentations, speakers bureaus, manuscript writing or educational events | <input checked="" type="checkbox"/> <b>None</b><br><table border="1"> <tr><td></td><td></td></tr> <tr><td></td><td></td></tr> <tr><td></td><td></td></tr> </table>                                                                                                                                                                                                                                                                                                                                                                                                                                                    |                                                                                     |                        |      |            |              |                        |                     |            |                    |            |           |            |              |            |                      |            |             |            |               |            |  |
|                      |                                                                                                              |                                                                                                                                                                                                                                                                                                                                                                                                                                                                                                                                                                                                                       |                                                                                     |                        |      |            |              |                        |                     |            |                    |            |           |            |              |            |                      |            |             |            |               |            |  |
|                      |                                                                                                              |                                                                                                                                                                                                                                                                                                                                                                                                                                                                                                                                                                                                                       |                                                                                     |                        |      |            |              |                        |                     |            |                    |            |           |            |              |            |                      |            |             |            |               |            |  |
|                      |                                                                                                              |                                                                                                                                                                                                                                                                                                                                                                                                                                                                                                                                                                                                                       |                                                                                     |                        |      |            |              |                        |                     |            |                    |            |           |            |              |            |                      |            |             |            |               |            |  |
| 6                    | Payment for expert testimony                                                                                 | <input checked="" type="checkbox"/> <b>None</b><br><table border="1"> <tr><td></td><td></td></tr> <tr><td></td><td></td></tr> <tr><td></td><td></td></tr> </table>                                                                                                                                                                                                                                                                                                                                                                                                                                                    |                                                                                     |                        |      |            |              |                        |                     |            |                    |            |           |            |              |            |                      |            |             |            |               |            |  |
|                      |                                                                                                              |                                                                                                                                                                                                                                                                                                                                                                                                                                                                                                                                                                                                                       |                                                                                     |                        |      |            |              |                        |                     |            |                    |            |           |            |              |            |                      |            |             |            |               |            |  |
|                      |                                                                                                              |                                                                                                                                                                                                                                                                                                                                                                                                                                                                                                                                                                                                                       |                                                                                     |                        |      |            |              |                        |                     |            |                    |            |           |            |              |            |                      |            |             |            |               |            |  |
|                      |                                                                                                              |                                                                                                                                                                                                                                                                                                                                                                                                                                                                                                                                                                                                                       |                                                                                     |                        |      |            |              |                        |                     |            |                    |            |           |            |              |            |                      |            |             |            |               |            |  |
| 7                    | Support for attending meetings and/or travel                                                                 | <input checked="" type="checkbox"/> <b>None</b><br><table border="1"> <tr><td></td><td></td></tr> <tr><td></td><td></td></tr> <tr><td></td><td></td></tr> </table>                                                                                                                                                                                                                                                                                                                                                                                                                                                    |                                                                                     |                        |      |            |              |                        |                     |            |                    |            |           |            |              |            |                      |            |             |            |               |            |  |
|                      |                                                                                                              |                                                                                                                                                                                                                                                                                                                                                                                                                                                                                                                                                                                                                       |                                                                                     |                        |      |            |              |                        |                     |            |                    |            |           |            |              |            |                      |            |             |            |               |            |  |
|                      |                                                                                                              |                                                                                                                                                                                                                                                                                                                                                                                                                                                                                                                                                                                                                       |                                                                                     |                        |      |            |              |                        |                     |            |                    |            |           |            |              |            |                      |            |             |            |               |            |  |
|                      |                                                                                                              |                                                                                                                                                                                                                                                                                                                                                                                                                                                                                                                                                                                                                       |                                                                                     |                        |      |            |              |                        |                     |            |                    |            |           |            |              |            |                      |            |             |            |               |            |  |
| 8                    | Patents planned, issued or pending                                                                           | <input checked="" type="checkbox"/> <b>None</b><br><table border="1"> <tr><td></td><td></td></tr> <tr><td></td><td></td></tr> <tr><td></td><td></td></tr> </table>                                                                                                                                                                                                                                                                                                                                                                                                                                                    |                                                                                     |                        |      |            |              |                        |                     |            |                    |            |           |            |              |            |                      |            |             |            |               |            |  |
|                      |                                                                                                              |                                                                                                                                                                                                                                                                                                                                                                                                                                                                                                                                                                                                                       |                                                                                     |                        |      |            |              |                        |                     |            |                    |            |           |            |              |            |                      |            |             |            |               |            |  |
|                      |                                                                                                              |                                                                                                                                                                                                                                                                                                                                                                                                                                                                                                                                                                                                                       |                                                                                     |                        |      |            |              |                        |                     |            |                    |            |           |            |              |            |                      |            |             |            |               |            |  |
|                      |                                                                                                              |                                                                                                                                                                                                                                                                                                                                                                                                                                                                                                                                                                                                                       |                                                                                     |                        |      |            |              |                        |                     |            |                    |            |           |            |              |            |                      |            |             |            |               |            |  |
| 9                    | Participation on a Data Safety Monitoring Board or Advisory Board                                            | <input type="checkbox"/> <b>None</b><br><table border="1"> <tr><td>MiVI</td><td></td></tr> <tr><td>eLum</td><td></td></tr> <tr><td>Three Rivers</td><td></td></tr> <tr><td>Shape Medical</td><td></td></tr> <tr><td>Corindus</td><td></td></tr> </table>                                                                                                                                                                                                                                                                                                                                                              | MiVI                                                                                |                        | eLum |            | Three Rivers |                        | Shape Medical       |            | Corindus           |            |           |            |              |            |                      |            |             |            |               |            |  |
| MiVI                 |                                                                                                              |                                                                                                                                                                                                                                                                                                                                                                                                                                                                                                                                                                                                                       |                                                                                     |                        |      |            |              |                        |                     |            |                    |            |           |            |              |            |                      |            |             |            |               |            |  |
| eLum                 |                                                                                                              |                                                                                                                                                                                                                                                                                                                                                                                                                                                                                                                                                                                                                       |                                                                                     |                        |      |            |              |                        |                     |            |                    |            |           |            |              |            |                      |            |             |            |               |            |  |
| Three Rivers         |                                                                                                              |                                                                                                                                                                                                                                                                                                                                                                                                                                                                                                                                                                                                                       |                                                                                     |                        |      |            |              |                        |                     |            |                    |            |           |            |              |            |                      |            |             |            |               |            |  |
| Shape Medical        |                                                                                                              |                                                                                                                                                                                                                                                                                                                                                                                                                                                                                                                                                                                                                       |                                                                                     |                        |      |            |              |                        |                     |            |                    |            |           |            |              |            |                      |            |             |            |               |            |  |
| Corindus             |                                                                                                              |                                                                                                                                                                                                                                                                                                                                                                                                                                                                                                                                                                                                                       |                                                                                     |                        |      |            |              |                        |                     |            |                    |            |           |            |              |            |                      |            |             |            |               |            |  |
| 10                   | Leadership or fiduciary role in other board,                                                                 | <input type="checkbox"/> <b>None</b>                                                                                                                                                                                                                                                                                                                                                                                                                                                                                                                                                                                  |                                                                                     |                        |      |            |              |                        |                     |            |                    |            |           |            |              |            |                      |            |             |            |               |            |  |

|                                                                                                                                                                                                                                                               |                                                                                  | Name all entities with whom you have this relationship or indicate none (add rows as needed) | Specifications/Comments (e.g., if payments were made to you or to your institution) |
|---------------------------------------------------------------------------------------------------------------------------------------------------------------------------------------------------------------------------------------------------------------|----------------------------------------------------------------------------------|----------------------------------------------------------------------------------------------|-------------------------------------------------------------------------------------|
|                                                                                                                                                                                                                                                               | society, committee or advocacy group, paid or unpaid                             | InNeuroCo                                                                                    |                                                                                     |
|                                                                                                                                                                                                                                                               |                                                                                  | Cerebrotech                                                                                  |                                                                                     |
|                                                                                                                                                                                                                                                               |                                                                                  | eLum                                                                                         |                                                                                     |
|                                                                                                                                                                                                                                                               |                                                                                  | Endostream                                                                                   |                                                                                     |
|                                                                                                                                                                                                                                                               |                                                                                  | Three Rivers Medical Inc                                                                     |                                                                                     |
|                                                                                                                                                                                                                                                               |                                                                                  | Scientia                                                                                     |                                                                                     |
|                                                                                                                                                                                                                                                               |                                                                                  | RisT                                                                                         |                                                                                     |
|                                                                                                                                                                                                                                                               |                                                                                  | Blink TBI                                                                                    |                                                                                     |
|                                                                                                                                                                                                                                                               |                                                                                  | Corindus                                                                                     |                                                                                     |
| <b>11</b>                                                                                                                                                                                                                                                     | Stock or stock options                                                           | <input checked="" type="checkbox"/> <b>None</b>                                              |                                                                                     |
|                                                                                                                                                                                                                                                               |                                                                                  |                                                                                              |                                                                                     |
|                                                                                                                                                                                                                                                               |                                                                                  |                                                                                              |                                                                                     |
|                                                                                                                                                                                                                                                               |                                                                                  |                                                                                              |                                                                                     |
| <b>12</b>                                                                                                                                                                                                                                                     | Receipt of equipment, materials, drugs, medical writing, gifts or other services | <input checked="" type="checkbox"/> <b>None</b>                                              |                                                                                     |
|                                                                                                                                                                                                                                                               |                                                                                  |                                                                                              |                                                                                     |
|                                                                                                                                                                                                                                                               |                                                                                  |                                                                                              |                                                                                     |
|                                                                                                                                                                                                                                                               |                                                                                  |                                                                                              |                                                                                     |
| <b>13</b>                                                                                                                                                                                                                                                     | Other financial or non-financial interests                                       | <input checked="" type="checkbox"/> <b>None</b>                                              |                                                                                     |
|                                                                                                                                                                                                                                                               |                                                                                  |                                                                                              |                                                                                     |
|                                                                                                                                                                                                                                                               |                                                                                  |                                                                                              |                                                                                     |
|                                                                                                                                                                                                                                                               |                                                                                  |                                                                                              |                                                                                     |
| <p><b>Please place an "X" next to the following statement to indicate your agreement:</b></p> <p><input checked="" type="checkbox"/> I certify that I have answered every question and have not altered the wording of any of the questions on this form.</p> |                                                                                  |                                                                                              |                                                                                     |

ICMJE DISCLOSURE FORM

Date:

1/13/2022

Your Name:

Ryan Priest

Manuscript Title:

Prospective Study on Embolization of Intracranial Aneurysms with the Pipeline Device (PREMIER study): 3-year results with the application of a flow diverter-specific occlusion classification

Manuscript Number (if known):

neurintsurg-2021-018501

In the interest of transparency, we ask you to disclose all relationships/activities/interests listed below that are related to the content of your manuscript. “Related” means any relation with for-profit or not-for-profit third parties whose interests may be affected by the content of the manuscript. Disclosure represents a commitment to transparency and does not necessarily indicate a bias. If you are in doubt about whether to list a relationship/activity/interest, it is preferable that you do so.

The author’s relationships/activities/interests should be defined broadly. For example, if your manuscript pertains to the epidemiology of hypertension, you should declare all relationships with manufacturers of antihypertensive medication, even if that medication is not mentioned in the manuscript.

In item #1 below, report all support for the work reported in this manuscript without time limit. For all other items, the time frame for disclosure is the past 36 months.

|                                                    | Name all entities with whom you have this relationship or indicate none (add rows as needed)                                                                                                                                                                                                                                                                                      | Specifications/Comments (e.g., if payments were made to you or to your institution) |  |  |  |  |                                           |  |
|----------------------------------------------------|-----------------------------------------------------------------------------------------------------------------------------------------------------------------------------------------------------------------------------------------------------------------------------------------------------------------------------------------------------------------------------------|-------------------------------------------------------------------------------------|--|--|--|--|-------------------------------------------|--|
| Time frame: Since the initial planning of the work |                                                                                                                                                                                                                                                                                                                                                                                   |                                                                                     |  |  |  |  |                                           |  |
| 1                                                  | <div>All support for the present manuscript (e.g., funding, provision of study materials, medical writing, article processing charges, etc.)<br/>No time limit for this item.</div> <div><input checked="" type="checkbox"/> None</div> <table><tr><td></td><td></td></tr><tr><td></td><td></td></tr><tr><td></td><td>Click the tab key to add additional rows.</td></tr></table> |                                                                                     |  |  |  |  | Click the tab key to add additional rows. |  |
|                                                    |                                                                                                                                                                                                                                                                                                                                                                                   |                                                                                     |  |  |  |  |                                           |  |
|                                                    |                                                                                                                                                                                                                                                                                                                                                                                   |                                                                                     |  |  |  |  |                                           |  |
|                                                    | Click the tab key to add additional rows.                                                                                                                                                                                                                                                                                                                                         |                                                                                     |  |  |  |  |                                           |  |
| Time frame: past 36 months                         |                                                                                                                                                                                                                                                                                                                                                                                   |                                                                                     |  |  |  |  |                                           |  |
| 2                                                  | <div>Grants or contracts from any entity (if not indicated in item #1 above).</div> <div><input checked="" type="checkbox"/> None</div> <table><tr><td></td><td></td></tr><tr><td></td><td></td></tr><tr><td></td><td></td></tr></table>                                                                                                                                          |                                                                                     |  |  |  |  |                                           |  |
|                                                    |                                                                                                                                                                                                                                                                                                                                                                                   |                                                                                     |  |  |  |  |                                           |  |
|                                                    |                                                                                                                                                                                                                                                                                                                                                                                   |                                                                                     |  |  |  |  |                                           |  |
|                                                    |                                                                                                                                                                                                                                                                                                                                                                                   |                                                                                     |  |  |  |  |                                           |  |
| 3                                                  | <div>Royalties or licenses</div> <div><input checked="" type="checkbox"/> None</div> <table><tr><td></td><td></td></tr><tr><td></td><td></td></tr><tr><td></td><td></td></tr></table>                                                                                                                                                                                             |                                                                                     |  |  |  |  |                                           |  |
|                                                    |                                                                                                                                                                                                                                                                                                                                                                                   |                                                                                     |  |  |  |  |                                           |  |
|                                                    |                                                                                                                                                                                                                                                                                                                                                                                   |                                                                                     |  |  |  |  |                                           |  |
|                                                    |                                                                                                                                                                                                                                                                                                                                                                                   |                                                                                     |  |  |  |  |                                           |  |

|                         |                                                                                                              | Name all entities with whom you have this relationship or indicate none (add rows as needed)                                                                                                                                                                                                             | Specifications/Comments (e.g., if payments were made to you or to your institution) |                 |                       |                 |                         |                 |  |  |  |
|-------------------------|--------------------------------------------------------------------------------------------------------------|----------------------------------------------------------------------------------------------------------------------------------------------------------------------------------------------------------------------------------------------------------------------------------------------------------|-------------------------------------------------------------------------------------|-----------------|-----------------------|-----------------|-------------------------|-----------------|--|--|--|
| 4                       | Consulting fees                                                                                              | <input type="checkbox"/> None<br><table border="1"> <tr> <td>Medtronic Neurovascular</td> <td>Direct payments</td> </tr> <tr> <td>Stryker Neurovascular</td> <td>Direct payments</td> </tr> <tr> <td>Cerenovus Neurovascular</td> <td>Direct payments</td> </tr> <tr> <td></td> <td></td> </tr> </table> | Medtronic Neurovascular                                                             | Direct payments | Stryker Neurovascular | Direct payments | Cerenovus Neurovascular | Direct payments |  |  |  |
| Medtronic Neurovascular | Direct payments                                                                                              |                                                                                                                                                                                                                                                                                                          |                                                                                     |                 |                       |                 |                         |                 |  |  |  |
| Stryker Neurovascular   | Direct payments                                                                                              |                                                                                                                                                                                                                                                                                                          |                                                                                     |                 |                       |                 |                         |                 |  |  |  |
| Cerenovus Neurovascular | Direct payments                                                                                              |                                                                                                                                                                                                                                                                                                          |                                                                                     |                 |                       |                 |                         |                 |  |  |  |
|                         |                                                                                                              |                                                                                                                                                                                                                                                                                                          |                                                                                     |                 |                       |                 |                         |                 |  |  |  |
| 5                       | Payment or honoraria for lectures, presentations, speakers bureaus, manuscript writing or educational events | <input type="checkbox"/> None<br><table border="1"> <tr> <td></td> <td></td> </tr> <tr> <td></td> <td></td> </tr> <tr> <td></td> <td></td> </tr> </table>                                                                                                                                                |                                                                                     |                 |                       |                 |                         |                 |  |  |  |
|                         |                                                                                                              |                                                                                                                                                                                                                                                                                                          |                                                                                     |                 |                       |                 |                         |                 |  |  |  |
|                         |                                                                                                              |                                                                                                                                                                                                                                                                                                          |                                                                                     |                 |                       |                 |                         |                 |  |  |  |
|                         |                                                                                                              |                                                                                                                                                                                                                                                                                                          |                                                                                     |                 |                       |                 |                         |                 |  |  |  |
| 6                       | Payment for expert testimony                                                                                 | <input type="checkbox"/> None<br><table border="1"> <tr> <td></td> <td></td> </tr> <tr> <td></td> <td></td> </tr> <tr> <td></td> <td></td> </tr> </table>                                                                                                                                                |                                                                                     |                 |                       |                 |                         |                 |  |  |  |
|                         |                                                                                                              |                                                                                                                                                                                                                                                                                                          |                                                                                     |                 |                       |                 |                         |                 |  |  |  |
|                         |                                                                                                              |                                                                                                                                                                                                                                                                                                          |                                                                                     |                 |                       |                 |                         |                 |  |  |  |
|                         |                                                                                                              |                                                                                                                                                                                                                                                                                                          |                                                                                     |                 |                       |                 |                         |                 |  |  |  |
| 7                       | Support for attending meetings and/or travel                                                                 | <input type="checkbox"/> None<br><table border="1"> <tr> <td>Medtronic Neurovascular</td> <td></td> </tr> <tr> <td>Stryker Neurovascular</td> <td></td> </tr> <tr> <td>Cerenovus Neurovascular</td> <td></td> </tr> </table>                                                                             | Medtronic Neurovascular                                                             |                 | Stryker Neurovascular |                 | Cerenovus Neurovascular |                 |  |  |  |
| Medtronic Neurovascular |                                                                                                              |                                                                                                                                                                                                                                                                                                          |                                                                                     |                 |                       |                 |                         |                 |  |  |  |
| Stryker Neurovascular   |                                                                                                              |                                                                                                                                                                                                                                                                                                          |                                                                                     |                 |                       |                 |                         |                 |  |  |  |
| Cerenovus Neurovascular |                                                                                                              |                                                                                                                                                                                                                                                                                                          |                                                                                     |                 |                       |                 |                         |                 |  |  |  |
| 8                       | Patents planned, issued or pending                                                                           | <input type="checkbox"/> None<br><table border="1"> <tr> <td></td> <td></td> </tr> <tr> <td></td> <td></td> </tr> <tr> <td></td> <td></td> </tr> </table>                                                                                                                                                |                                                                                     |                 |                       |                 |                         |                 |  |  |  |
|                         |                                                                                                              |                                                                                                                                                                                                                                                                                                          |                                                                                     |                 |                       |                 |                         |                 |  |  |  |
|                         |                                                                                                              |                                                                                                                                                                                                                                                                                                          |                                                                                     |                 |                       |                 |                         |                 |  |  |  |
|                         |                                                                                                              |                                                                                                                                                                                                                                                                                                          |                                                                                     |                 |                       |                 |                         |                 |  |  |  |
| 9                       | Participation on a Data Safety Monitoring Board or Advisory Board                                            | <input type="checkbox"/> None<br><table border="1"> <tr> <td></td> <td></td> </tr> <tr> <td></td> <td></td> </tr> <tr> <td></td> <td></td> </tr> </table>                                                                                                                                                |                                                                                     |                 |                       |                 |                         |                 |  |  |  |
|                         |                                                                                                              |                                                                                                                                                                                                                                                                                                          |                                                                                     |                 |                       |                 |                         |                 |  |  |  |
|                         |                                                                                                              |                                                                                                                                                                                                                                                                                                          |                                                                                     |                 |                       |                 |                         |                 |  |  |  |
|                         |                                                                                                              |                                                                                                                                                                                                                                                                                                          |                                                                                     |                 |                       |                 |                         |                 |  |  |  |
| 10                      | Leadership or fiduciary role in other board, society, committee or advocacy group, paid or unpaid            | <input type="checkbox"/> None<br><table border="1"> <tr> <td></td> <td></td> </tr> <tr> <td></td> <td></td> </tr> <tr> <td></td> <td></td> </tr> </table>                                                                                                                                                |                                                                                     |                 |                       |                 |                         |                 |  |  |  |
|                         |                                                                                                              |                                                                                                                                                                                                                                                                                                          |                                                                                     |                 |                       |                 |                         |                 |  |  |  |
|                         |                                                                                                              |                                                                                                                                                                                                                                                                                                          |                                                                                     |                 |                       |                 |                         |                 |  |  |  |
|                         |                                                                                                              |                                                                                                                                                                                                                                                                                                          |                                                                                     |                 |                       |                 |                         |                 |  |  |  |

|           |                                                                                  | Name all entities with whom you have this relationship or indicate none (add rows as needed)                                                                       | Specifications/Comments (e.g., if payments were made to you or to your institution) |  |  |  |  |  |  |
|-----------|----------------------------------------------------------------------------------|--------------------------------------------------------------------------------------------------------------------------------------------------------------------|-------------------------------------------------------------------------------------|--|--|--|--|--|--|
| <b>11</b> | Stock or stock options                                                           | <input type="checkbox"/> <b>None</b><br><table border="1"> <tr><td></td><td></td></tr> <tr><td></td><td></td></tr> <tr><td></td><td></td></tr> </table>            |                                                                                     |  |  |  |  |  |  |
|           |                                                                                  |                                                                                                                                                                    |                                                                                     |  |  |  |  |  |  |
|           |                                                                                  |                                                                                                                                                                    |                                                                                     |  |  |  |  |  |  |
|           |                                                                                  |                                                                                                                                                                    |                                                                                     |  |  |  |  |  |  |
| <b>12</b> | Receipt of equipment, materials, drugs, medical writing, gifts or other services | <input type="checkbox"/> <b>None</b><br><table border="1"> <tr><td></td><td></td></tr> <tr><td></td><td></td></tr> <tr><td></td><td></td></tr> </table>            |                                                                                     |  |  |  |  |  |  |
|           |                                                                                  |                                                                                                                                                                    |                                                                                     |  |  |  |  |  |  |
|           |                                                                                  |                                                                                                                                                                    |                                                                                     |  |  |  |  |  |  |
|           |                                                                                  |                                                                                                                                                                    |                                                                                     |  |  |  |  |  |  |
| <b>13</b> | Other financial or non-financial interests                                       | <input checked="" type="checkbox"/> <b>None</b><br><table border="1"> <tr><td></td><td></td></tr> <tr><td></td><td></td></tr> <tr><td></td><td></td></tr> </table> |                                                                                     |  |  |  |  |  |  |
|           |                                                                                  |                                                                                                                                                                    |                                                                                     |  |  |  |  |  |  |
|           |                                                                                  |                                                                                                                                                                    |                                                                                     |  |  |  |  |  |  |
|           |                                                                                  |                                                                                                                                                                    |                                                                                     |  |  |  |  |  |  |

**Please place an "X" next to the following statement to indicate your agreement:**

☒ I certify that I have answered every question and have not altered the wording of any of the questions on this form.

## ICMJE DISCLOSURE FORM

**Date:** 1/18/2022

**Your Name:** Dr. Timo Krings

**Manuscript Title:** Prospective Study on Embolization of Intracranial Aneurysms with the Pipeline Device (PREMIER study): 3-year results with the application of a flow diverter-specific occlusion classification

**Manuscript Number (if known):** neurintsurg-2021-018501

In the interest of transparency, we ask you to disclose all relationships/activities/interests listed below that are related to the content of your manuscript. "Related" means any relation with for-profit or not-for-profit third parties whose interests may be affected by the content of the manuscript. Disclosure represents a commitment to transparency and does not necessarily indicate a bias. If you are in doubt about whether to list a relationship/activity/interest, it is preferable that you do so.

The author's relationships/activities/interests should be defined broadly. For example, if your manuscript pertains to the epidemiology of hypertension, you should declare all relationships with manufacturers of antihypertensive medication, even if that medication is not mentioned in the manuscript.

In item #1 below, report all support for the work reported in this manuscript without time limit. For all other items, the time frame for disclosure is the past 36 months.

|                                                           | Name all entities with whom you have this relationship or indicate none (add rows as needed)                                                                                   | Specifications/Comments (e.g., if payments were made to you or to your institution)                                                                                                                                             |        |                                                                 |  |  |  |                                           |
|-----------------------------------------------------------|--------------------------------------------------------------------------------------------------------------------------------------------------------------------------------|---------------------------------------------------------------------------------------------------------------------------------------------------------------------------------------------------------------------------------|--------|-----------------------------------------------------------------|--|--|--|-------------------------------------------|
| <b>Time frame: Since the initial planning of the work</b> |                                                                                                                                                                                |                                                                                                                                                                                                                                 |        |                                                                 |  |  |  |                                           |
| <b>1</b>                                                  | All support for the present manuscript (e.g., funding, provision of study materials, medical writing, article processing charges, etc.)<br><b>No time limit for this item.</b> | <input checked="" type="checkbox"/> <b>None</b><br><table border="1"> <tr><td></td><td></td></tr> <tr><td></td><td></td></tr> <tr><td></td><td>Click the tab key to add additional rows.</td></tr> </table>                     |        |                                                                 |  |  |  | Click the tab key to add additional rows. |
|                                                           |                                                                                                                                                                                |                                                                                                                                                                                                                                 |        |                                                                 |  |  |  |                                           |
|                                                           |                                                                                                                                                                                |                                                                                                                                                                                                                                 |        |                                                                 |  |  |  |                                           |
|                                                           | Click the tab key to add additional rows.                                                                                                                                      |                                                                                                                                                                                                                                 |        |                                                                 |  |  |  |                                           |
| <b>Time frame: past 36 months</b>                         |                                                                                                                                                                                |                                                                                                                                                                                                                                 |        |                                                                 |  |  |  |                                           |
| <b>2</b>                                                  | Grants or contracts from any entity (if not indicated in item #1 above).                                                                                                       | <input checked="" type="checkbox"/> <b>None</b><br><table border="1"> <tr><td></td><td></td></tr> <tr><td></td><td></td></tr> <tr><td></td><td></td></tr> </table>                                                              |        |                                                                 |  |  |  |                                           |
|                                                           |                                                                                                                                                                                |                                                                                                                                                                                                                                 |        |                                                                 |  |  |  |                                           |
|                                                           |                                                                                                                                                                                |                                                                                                                                                                                                                                 |        |                                                                 |  |  |  |                                           |
|                                                           |                                                                                                                                                                                |                                                                                                                                                                                                                                 |        |                                                                 |  |  |  |                                           |
| <b>3</b>                                                  | Royalties or licenses                                                                                                                                                          | <input type="checkbox"/> <b>None</b><br><table border="1"> <tr> <td>Thieme</td> <td>Royalties for 4 textbooks on Neurovascular Diseases and Anatomy</td> </tr> <tr><td></td><td></td></tr> <tr><td></td><td></td></tr> </table> | Thieme | Royalties for 4 textbooks on Neurovascular Diseases and Anatomy |  |  |  |                                           |
| Thieme                                                    | Royalties for 4 textbooks on Neurovascular Diseases and Anatomy                                                                                                                |                                                                                                                                                                                                                                 |        |                                                                 |  |  |  |                                           |
|                                                           |                                                                                                                                                                                |                                                                                                                                                                                                                                 |        |                                                                 |  |  |  |                                           |
|                                                           |                                                                                                                                                                                |                                                                                                                                                                                                                                 |        |                                                                 |  |  |  |                                           |

|                                         |                                                                                                              | Name all entities with whom you have this relationship or indicate none (add rows as needed)                                                                                                                        | Specifications/Comments (e.g., if payments were made to you or to your institution) |  |  |  |  |  |  |  |  |
|-----------------------------------------|--------------------------------------------------------------------------------------------------------------|---------------------------------------------------------------------------------------------------------------------------------------------------------------------------------------------------------------------|-------------------------------------------------------------------------------------|--|--|--|--|--|--|--|--|
| 4                                       | Consulting fees                                                                                              | <input type="checkbox"/> None<br><table border="1"> <tr><td>Stryker, Cerenovus, Penumbra, Medtronic</td><td></td></tr> <tr><td></td><td></td></tr> <tr><td></td><td></td></tr> <tr><td></td><td></td></tr> </table> | Stryker, Cerenovus, Penumbra, Medtronic                                             |  |  |  |  |  |  |  |  |
| Stryker, Cerenovus, Penumbra, Medtronic |                                                                                                              |                                                                                                                                                                                                                     |                                                                                     |  |  |  |  |  |  |  |  |
|                                         |                                                                                                              |                                                                                                                                                                                                                     |                                                                                     |  |  |  |  |  |  |  |  |
|                                         |                                                                                                              |                                                                                                                                                                                                                     |                                                                                     |  |  |  |  |  |  |  |  |
|                                         |                                                                                                              |                                                                                                                                                                                                                     |                                                                                     |  |  |  |  |  |  |  |  |
| 5                                       | Payment or honoraria for lectures, presentations, speakers bureaus, manuscript writing or educational events | <input checked="" type="checkbox"/> None<br><table border="1"> <tr><td></td><td></td></tr> <tr><td></td><td></td></tr> <tr><td></td><td></td></tr> </table>                                                         |                                                                                     |  |  |  |  |  |  |  |  |
|                                         |                                                                                                              |                                                                                                                                                                                                                     |                                                                                     |  |  |  |  |  |  |  |  |
|                                         |                                                                                                              |                                                                                                                                                                                                                     |                                                                                     |  |  |  |  |  |  |  |  |
|                                         |                                                                                                              |                                                                                                                                                                                                                     |                                                                                     |  |  |  |  |  |  |  |  |
| 6                                       | Payment for expert testimony                                                                                 | <input type="checkbox"/> None<br><table border="1"> <tr><td>CMPA</td><td></td></tr> <tr><td></td><td></td></tr> <tr><td></td><td></td></tr> </table>                                                                | CMPA                                                                                |  |  |  |  |  |  |  |  |
| CMPA                                    |                                                                                                              |                                                                                                                                                                                                                     |                                                                                     |  |  |  |  |  |  |  |  |
|                                         |                                                                                                              |                                                                                                                                                                                                                     |                                                                                     |  |  |  |  |  |  |  |  |
|                                         |                                                                                                              |                                                                                                                                                                                                                     |                                                                                     |  |  |  |  |  |  |  |  |
| 7                                       | Support for attending meetings and/or travel                                                                 | <input checked="" type="checkbox"/> None<br><table border="1"> <tr><td></td><td></td></tr> <tr><td></td><td></td></tr> <tr><td></td><td></td></tr> </table>                                                         |                                                                                     |  |  |  |  |  |  |  |  |
|                                         |                                                                                                              |                                                                                                                                                                                                                     |                                                                                     |  |  |  |  |  |  |  |  |
|                                         |                                                                                                              |                                                                                                                                                                                                                     |                                                                                     |  |  |  |  |  |  |  |  |
|                                         |                                                                                                              |                                                                                                                                                                                                                     |                                                                                     |  |  |  |  |  |  |  |  |
| 8                                       | Patents planned, issued or pending                                                                           | <input checked="" type="checkbox"/> None<br><table border="1"> <tr><td></td><td></td></tr> <tr><td></td><td></td></tr> <tr><td></td><td></td></tr> </table>                                                         |                                                                                     |  |  |  |  |  |  |  |  |
|                                         |                                                                                                              |                                                                                                                                                                                                                     |                                                                                     |  |  |  |  |  |  |  |  |
|                                         |                                                                                                              |                                                                                                                                                                                                                     |                                                                                     |  |  |  |  |  |  |  |  |
|                                         |                                                                                                              |                                                                                                                                                                                                                     |                                                                                     |  |  |  |  |  |  |  |  |
| 9                                       | Participation on a Data Safety Monitoring Board or Advisory Board                                            | <input type="checkbox"/> None<br><table border="1"> <tr><td>Stryker</td><td></td></tr> <tr><td></td><td></td></tr> <tr><td></td><td></td></tr> </table>                                                             | Stryker                                                                             |  |  |  |  |  |  |  |  |
| Stryker                                 |                                                                                                              |                                                                                                                                                                                                                     |                                                                                     |  |  |  |  |  |  |  |  |
|                                         |                                                                                                              |                                                                                                                                                                                                                     |                                                                                     |  |  |  |  |  |  |  |  |
|                                         |                                                                                                              |                                                                                                                                                                                                                     |                                                                                     |  |  |  |  |  |  |  |  |
| 10                                      | Leadership or fiduciary role in other board, society, committee or advocacy group, paid or unpaid            | <input type="checkbox"/> None<br><table border="1"> <tr><td>Brain Vascular Malformation Consortium</td><td></td></tr> <tr><td></td><td></td></tr> <tr><td></td><td></td></tr> </table>                              | Brain Vascular Malformation Consortium                                              |  |  |  |  |  |  |  |  |
| Brain Vascular Malformation Consortium  |                                                                                                              |                                                                                                                                                                                                                     |                                                                                     |  |  |  |  |  |  |  |  |
|                                         |                                                                                                              |                                                                                                                                                                                                                     |                                                                                     |  |  |  |  |  |  |  |  |
|                                         |                                                                                                              |                                                                                                                                                                                                                     |                                                                                     |  |  |  |  |  |  |  |  |

|            |                                                                                  | Name all entities with whom you have this relationship or indicate none (add rows as needed)                                                                                | Specifications/Comments (e.g., if payments were made to you or to your institution) |  |  |  |  |  |  |
|------------|----------------------------------------------------------------------------------|-----------------------------------------------------------------------------------------------------------------------------------------------------------------------------|-------------------------------------------------------------------------------------|--|--|--|--|--|--|
| <b>11</b>  | Stock or stock options                                                           | <input type="checkbox"/> <b>None</b><br><table border="1"> <tr> <td>Marblehead</td> <td></td> </tr> <tr> <td></td> <td></td> </tr> <tr> <td></td> <td></td> </tr> </table>  | Marblehead                                                                          |  |  |  |  |  |  |
| Marblehead |                                                                                  |                                                                                                                                                                             |                                                                                     |  |  |  |  |  |  |
|            |                                                                                  |                                                                                                                                                                             |                                                                                     |  |  |  |  |  |  |
|            |                                                                                  |                                                                                                                                                                             |                                                                                     |  |  |  |  |  |  |
| <b>12</b>  | Receipt of equipment, materials, drugs, medical writing, gifts or other services | <input checked="" type="checkbox"/> <b>None</b><br><table border="1"> <tr> <td></td> <td></td> </tr> <tr> <td></td> <td></td> </tr> <tr> <td></td> <td></td> </tr> </table> |                                                                                     |  |  |  |  |  |  |
|            |                                                                                  |                                                                                                                                                                             |                                                                                     |  |  |  |  |  |  |
|            |                                                                                  |                                                                                                                                                                             |                                                                                     |  |  |  |  |  |  |
|            |                                                                                  |                                                                                                                                                                             |                                                                                     |  |  |  |  |  |  |
| <b>13</b>  | Other financial or non-financial interests                                       | <input checked="" type="checkbox"/> <b>None</b><br><table border="1"> <tr> <td></td> <td></td> </tr> <tr> <td></td> <td></td> </tr> <tr> <td></td> <td></td> </tr> </table> |                                                                                     |  |  |  |  |  |  |
|            |                                                                                  |                                                                                                                                                                             |                                                                                     |  |  |  |  |  |  |
|            |                                                                                  |                                                                                                                                                                             |                                                                                     |  |  |  |  |  |  |
|            |                                                                                  |                                                                                                                                                                             |                                                                                     |  |  |  |  |  |  |

**Please place an "X" next to the following statement to indicate your agreement:**

☒ I certify that I have answered every question and have not altered the wording of any of the questions on this form.



## ICMJE DISCLOSURE FORM

**Date:** 1/20/2022

**Your Name:** Vitor Mendes Pereira

**Manuscript Title:** Prospective Study on Embolization of Intracranial Aneurysms with the Pipeline Device (PREMIER study): 3-year results with the application of a flow diverter-specific occlusion classification

**Manuscript Number (if known):** neurintsurg-2021-018501

In the interest of transparency, we ask you to disclose all relationships/activities/interests listed below that are related to the content of your manuscript. "Related" means any relation with for-profit or not-for-profit third parties whose interests may be affected by the content of the manuscript. Disclosure represents a commitment to transparency and does not necessarily indicate a bias. If you are in doubt about whether to list a relationship/activity/interest, it is preferable that you do so.

The author's relationships/activities/interests should be defined broadly. For example, if your manuscript pertains to the epidemiology of hypertension, you should declare all relationships with manufacturers of antihypertensive medication, even if that medication is not mentioned in the manuscript.

In item #1 below, report all support for the work reported in this manuscript without time limit. For all other items, the time frame for disclosure is the past 36 months.

|                                                           | Name all entities with whom you have this relationship or indicate none (add rows as needed)                                                                                   | Specifications/Comments (e.g., if payments were made to you or to your institution)                                                                                                                                             |           |                     |  |  |  |                                           |
|-----------------------------------------------------------|--------------------------------------------------------------------------------------------------------------------------------------------------------------------------------|---------------------------------------------------------------------------------------------------------------------------------------------------------------------------------------------------------------------------------|-----------|---------------------|--|--|--|-------------------------------------------|
| <b>Time frame: Since the initial planning of the work</b> |                                                                                                                                                                                |                                                                                                                                                                                                                                 |           |                     |  |  |  |                                           |
| <b>1</b>                                                  | All support for the present manuscript (e.g., funding, provision of study materials, medical writing, article processing charges, etc.)<br><b>No time limit for this item.</b> | <input type="checkbox"/> <b>None</b><br><table border="1"> <tr> <td>Medtronic</td><td>Sponsored the study</td></tr> <tr> <td></td><td></td></tr> <tr> <td></td><td>Click the tab key to add additional rows.</td></tr> </table> | Medtronic | Sponsored the study |  |  |  | Click the tab key to add additional rows. |
| Medtronic                                                 | Sponsored the study                                                                                                                                                            |                                                                                                                                                                                                                                 |           |                     |  |  |  |                                           |
|                                                           |                                                                                                                                                                                |                                                                                                                                                                                                                                 |           |                     |  |  |  |                                           |
|                                                           | Click the tab key to add additional rows.                                                                                                                                      |                                                                                                                                                                                                                                 |           |                     |  |  |  |                                           |
| <b>Time frame: past 36 months</b>                         |                                                                                                                                                                                |                                                                                                                                                                                                                                 |           |                     |  |  |  |                                           |
| <b>2</b>                                                  | Grants or contracts from any entity (if not indicated in item #1 above).                                                                                                       | <input checked="" type="checkbox"/> <b>None</b><br><table border="1"> <tr><td></td><td></td></tr> <tr><td></td><td></td></tr> <tr><td></td><td></td></tr> </table>                                                              |           |                     |  |  |  |                                           |
|                                                           |                                                                                                                                                                                |                                                                                                                                                                                                                                 |           |                     |  |  |  |                                           |
|                                                           |                                                                                                                                                                                |                                                                                                                                                                                                                                 |           |                     |  |  |  |                                           |
|                                                           |                                                                                                                                                                                |                                                                                                                                                                                                                                 |           |                     |  |  |  |                                           |
| <b>3</b>                                                  | Royalties or licenses                                                                                                                                                          | <input checked="" type="checkbox"/> <b>None</b><br><table border="1"> <tr><td></td><td></td></tr> <tr><td></td><td></td></tr> <tr><td></td><td></td></tr> </table>                                                              |           |                     |  |  |  |                                           |
|                                                           |                                                                                                                                                                                |                                                                                                                                                                                                                                 |           |                     |  |  |  |                                           |
|                                                           |                                                                                                                                                                                |                                                                                                                                                                                                                                 |           |                     |  |  |  |                                           |
|                                                           |                                                                                                                                                                                |                                                                                                                                                                                                                                 |           |                     |  |  |  |                                           |

|            |                                                                                                              | Name all entities with whom you have this relationship or indicate none (add rows as needed)                                                                                                                      | Specifications/Comments (e.g., if payments were made to you or to your institution) |                 |  |  |  |  |  |  |  |
|------------|--------------------------------------------------------------------------------------------------------------|-------------------------------------------------------------------------------------------------------------------------------------------------------------------------------------------------------------------|-------------------------------------------------------------------------------------|-----------------|--|--|--|--|--|--|--|
| 4          | Consulting fees                                                                                              | <input type="checkbox"/> None<br><table border="1"> <tr> <td>Proctoring</td> <td>Consultant fees</td> </tr> <tr> <td></td> <td></td> </tr> <tr> <td></td> <td></td> </tr> <tr> <td></td> <td></td> </tr> </table> | Proctoring                                                                          | Consultant fees |  |  |  |  |  |  |  |
| Proctoring | Consultant fees                                                                                              |                                                                                                                                                                                                                   |                                                                                     |                 |  |  |  |  |  |  |  |
|            |                                                                                                              |                                                                                                                                                                                                                   |                                                                                     |                 |  |  |  |  |  |  |  |
|            |                                                                                                              |                                                                                                                                                                                                                   |                                                                                     |                 |  |  |  |  |  |  |  |
|            |                                                                                                              |                                                                                                                                                                                                                   |                                                                                     |                 |  |  |  |  |  |  |  |
| 5          | Payment or honoraria for lectures, presentations, speakers bureaus, manuscript writing or educational events | <input checked="" type="checkbox"/> None<br><table border="1"> <tr> <td></td> <td></td> </tr> <tr> <td></td> <td></td> </tr> <tr> <td></td> <td></td> </tr> </table>                                              |                                                                                     |                 |  |  |  |  |  |  |  |
|            |                                                                                                              |                                                                                                                                                                                                                   |                                                                                     |                 |  |  |  |  |  |  |  |
|            |                                                                                                              |                                                                                                                                                                                                                   |                                                                                     |                 |  |  |  |  |  |  |  |
|            |                                                                                                              |                                                                                                                                                                                                                   |                                                                                     |                 |  |  |  |  |  |  |  |
| 6          | Payment for expert testimony                                                                                 | <input checked="" type="checkbox"/> None<br><table border="1"> <tr> <td></td> <td></td> </tr> <tr> <td></td> <td></td> </tr> <tr> <td></td> <td></td> </tr> </table>                                              |                                                                                     |                 |  |  |  |  |  |  |  |
|            |                                                                                                              |                                                                                                                                                                                                                   |                                                                                     |                 |  |  |  |  |  |  |  |
|            |                                                                                                              |                                                                                                                                                                                                                   |                                                                                     |                 |  |  |  |  |  |  |  |
|            |                                                                                                              |                                                                                                                                                                                                                   |                                                                                     |                 |  |  |  |  |  |  |  |
| 7          | Support for attending meetings and/or travel                                                                 | <input checked="" type="checkbox"/> None<br><table border="1"> <tr> <td></td> <td></td> </tr> <tr> <td></td> <td></td> </tr> <tr> <td></td> <td></td> </tr> </table>                                              |                                                                                     |                 |  |  |  |  |  |  |  |
|            |                                                                                                              |                                                                                                                                                                                                                   |                                                                                     |                 |  |  |  |  |  |  |  |
|            |                                                                                                              |                                                                                                                                                                                                                   |                                                                                     |                 |  |  |  |  |  |  |  |
|            |                                                                                                              |                                                                                                                                                                                                                   |                                                                                     |                 |  |  |  |  |  |  |  |
| 8          | Patents planned, issued or pending                                                                           | <input checked="" type="checkbox"/> None<br><table border="1"> <tr> <td></td> <td></td> </tr> <tr> <td></td> <td></td> </tr> <tr> <td></td> <td></td> </tr> </table>                                              |                                                                                     |                 |  |  |  |  |  |  |  |
|            |                                                                                                              |                                                                                                                                                                                                                   |                                                                                     |                 |  |  |  |  |  |  |  |
|            |                                                                                                              |                                                                                                                                                                                                                   |                                                                                     |                 |  |  |  |  |  |  |  |
|            |                                                                                                              |                                                                                                                                                                                                                   |                                                                                     |                 |  |  |  |  |  |  |  |
| 9          | Participation on a Data Safety Monitoring Board or Advisory Board                                            | <input type="checkbox"/> None<br><table border="1"> <tr> <td></td> <td></td> </tr> <tr> <td></td> <td></td> </tr> <tr> <td></td> <td></td> </tr> </table>                                                         |                                                                                     |                 |  |  |  |  |  |  |  |
|            |                                                                                                              |                                                                                                                                                                                                                   |                                                                                     |                 |  |  |  |  |  |  |  |
|            |                                                                                                              |                                                                                                                                                                                                                   |                                                                                     |                 |  |  |  |  |  |  |  |
|            |                                                                                                              |                                                                                                                                                                                                                   |                                                                                     |                 |  |  |  |  |  |  |  |
| 10         | Leadership or fiduciary role in other board, society, committee or advocacy group, paid or unpaid            | <input checked="" type="checkbox"/> None<br><table border="1"> <tr> <td></td> <td></td> </tr> <tr> <td></td> <td></td> </tr> <tr> <td></td> <td></td> </tr> </table>                                              |                                                                                     |                 |  |  |  |  |  |  |  |
|            |                                                                                                              |                                                                                                                                                                                                                   |                                                                                     |                 |  |  |  |  |  |  |  |
|            |                                                                                                              |                                                                                                                                                                                                                   |                                                                                     |                 |  |  |  |  |  |  |  |
|            |                                                                                                              |                                                                                                                                                                                                                   |                                                                                     |                 |  |  |  |  |  |  |  |

|                                                                                                                                                                                                                                                               |                                                                                  | Name all entities with whom you have this relationship or indicate none (add rows as needed)                                                                                            | Specifications/Comments (e.g., if payments were made to you or to your institution) |  |  |  |  |  |  |
|---------------------------------------------------------------------------------------------------------------------------------------------------------------------------------------------------------------------------------------------------------------|----------------------------------------------------------------------------------|-----------------------------------------------------------------------------------------------------------------------------------------------------------------------------------------|-------------------------------------------------------------------------------------|--|--|--|--|--|--|
| <b>11</b>                                                                                                                                                                                                                                                     | Stock or stock options                                                           | <input checked="" type="checkbox"/> <b>None</b><br><table border="1" style="width: 100%;"> <tr><td></td><td></td></tr> <tr><td></td><td></td></tr> <tr><td></td><td></td></tr> </table> |                                                                                     |  |  |  |  |  |  |
|                                                                                                                                                                                                                                                               |                                                                                  |                                                                                                                                                                                         |                                                                                     |  |  |  |  |  |  |
|                                                                                                                                                                                                                                                               |                                                                                  |                                                                                                                                                                                         |                                                                                     |  |  |  |  |  |  |
|                                                                                                                                                                                                                                                               |                                                                                  |                                                                                                                                                                                         |                                                                                     |  |  |  |  |  |  |
| <b>12</b>                                                                                                                                                                                                                                                     | Receipt of equipment, materials, drugs, medical writing, gifts or other services | <input checked="" type="checkbox"/> <b>None</b><br><table border="1" style="width: 100%;"> <tr><td></td><td></td></tr> <tr><td></td><td></td></tr> <tr><td></td><td></td></tr> </table> |                                                                                     |  |  |  |  |  |  |
|                                                                                                                                                                                                                                                               |                                                                                  |                                                                                                                                                                                         |                                                                                     |  |  |  |  |  |  |
|                                                                                                                                                                                                                                                               |                                                                                  |                                                                                                                                                                                         |                                                                                     |  |  |  |  |  |  |
|                                                                                                                                                                                                                                                               |                                                                                  |                                                                                                                                                                                         |                                                                                     |  |  |  |  |  |  |
| <b>13</b>                                                                                                                                                                                                                                                     | Other financial or non-financial interests                                       | <input checked="" type="checkbox"/> <b>None</b><br><table border="1" style="width: 100%;"> <tr><td></td><td></td></tr> <tr><td></td><td></td></tr> <tr><td></td><td></td></tr> </table> |                                                                                     |  |  |  |  |  |  |
|                                                                                                                                                                                                                                                               |                                                                                  |                                                                                                                                                                                         |                                                                                     |  |  |  |  |  |  |
|                                                                                                                                                                                                                                                               |                                                                                  |                                                                                                                                                                                         |                                                                                     |  |  |  |  |  |  |
|                                                                                                                                                                                                                                                               |                                                                                  |                                                                                                                                                                                         |                                                                                     |  |  |  |  |  |  |
| <p><b>Please place an "X" next to the following statement to indicate your agreement:</b></p> <p><input checked="" type="checkbox"/> I certify that I have answered every question and have not altered the wording of any of the questions on this form.</p> |                                                                                  |                                                                                                                                                                                         |                                                                                     |  |  |  |  |  |  |
